1 **Article title:**

2 Phloem structure and development in *Illicium parviflorum*, a basal angiosperm shrub

3 **Authors:**

4 Juan M. Losada<sup>1,2\*</sup> and N. Michele Holbrook<sup>1,2</sup>

5 **Affiliations:**

6 <sup>1</sup>Department of Organismic and Evolutionary Biology, Harvard University. 16 Divinity Av.,  
7 Cambridge, MA, 02138, USA.

8 <sup>2</sup>Arnold Arboretum of Harvard University. 1300 Centre St., Boston, MA, 02130, USA.

9 \* Author for correspondence.

10 Phone: + 1 (617) 384 5631

11 E-mail: [juan.losada.r@gmail.com](mailto:juan.losada.r@gmail.com)

12

13 **WORD AND FIGURE COUNTS:**

14 Total word count: 5,882

15 Introduction: 835

16 Materials and Methods: 1,530

17 Results: 1,412

18 Discussion: 1,939

19 Number of color figures: 8

20 Supporting information figures: 2

21

22

23

24 **SUMMARY**

25 **Recent studies in canopy-dominant trees revealed a structure-function scaling of the**  
26 **phloem. However, whether axial scaling is conserved in woody plants of the understory, the**  
27 **environments of most basal-grade angiosperms, remains mysterious. We used seedlings**  
28 **and adult plants of the shrub *Illicium parviflorum* to explore the anatomy and physiology of**  
29 **the phloem in their aerial parts, and possible changes through ontogeny. Adult plants**  
30 **maintain a similar proportion of phloem tissue across stem diameters, but scaling of**  
31 **conduit dimensions and number decreases the hydraulic resistance towards the base of the**  
32 **plant. Yet, the small sieve plate pores resulted in an overall higher sieve tube hydraulic**  
33 **resistance than has been reported in other woody angiosperms. Sieve elements scaled from**  
34 **minor to major leaf veins, but were shorter and narrower in petioles. The low carbon**  
35 **assimilation rates of seedlings and mature plants contrasted with a three-fold higher**  
36 **phloem sap velocity in seedlings, suggesting that phloem transport velocity is modulated**  
37 **through ontogeny. While the overall architecture of the phloem tissue in basal-angiosperm**  
38 **understory shrubs scales in a manner consistent with trees, modification of conduit**  
39 **connections may have allowed woody angiosperms to extend beyond their understory**  
40 **origins.**

41  
42  
43  
44  
45  
46  
47  
48  
49

50 **Keywords:** Basal angiosperms, hydraulic conductivity, *Illicium parviflorum*, leaves, phloem,  
51 sieve tube element, vasculature, xylem.

## 52 INTRODUCTION

53 The ecological context in which angiosperms evolved has been hotly debated in the last decades.  
54 This is, in part, due to the apparent contradiction between the relative recent rise of angiosperms,  
55 measured in geological time (approximately 125 million years ago), and the rapid diversification  
56 that led to their ecological dominance (Feild *et al.*, 2003a; 2004). The success of flowering plants  
57 correlates with the evolution of anatomical innovations that improved their physiological  
58 performance in different environmental scenarios, such as leaf reticulate venation and large  
59 xylem vessels (Zwieniecki & Boyce, 2014; Boyce & Lee, 2017). Observations of fossils from  
60 ancestral angiosperm lineages revealed that their anatomical features mirror those of living  
61 members of the basal grade, which include a small vessel lumen fraction in the stems (Bailey &  
62 Nast, 1948; Carlquist, 1982; Carlquist & Schneider, 2002), leaves with thick cuticles and large  
63 stomata, as well as irregular leaf venation (Hickey & Doyle, 1977; Upchurch *et al.*, 1984;  
64 Carpenter, 2005; Coiffard *et al.* 2006). These data, combined with recent morpho-physiological  
65 measurements using extant taxa from the basal grade, point to wet, understory and disturbed  
66 habitats as a credible niche for the rise of angiosperms (Feild *et al.* 2003b, 2004; Feild & Arens,  
67 2005, 2007; Barral *et al.*, 2013). Most extant lineages of woody basal flowering plants are  
68 restricted to the understory areas of a few tropical environments. Understanding the structure and  
69 physiology of basal grade angiosperm phloem may shed light on growth constraints during their  
70 initial expansion in the Cretaceous, as well as bring information onto the hydraulic properties of  
71 the phloem of woody plants in the understory, so far overlooked.

72 A critical constraint of understory growth is the low availability of light and the consequent low  
73 rates of photosynthesis. Indeed, *in situ* measurements of the maximum photosynthetic activity in  
74 these conditions confirmed that low primary productivity is associated with a similarly low  
75 xylem hydraulic performance (Feild *et al.*, 2005). While the hydraulics of the xylem are coupled  
76 with the sugar loading of the phloem in the mesophyll (Hölttä *et al.* 2006; Liesche *et al.* 2011;  
77 Nikinmaa *et al.* 2013; Rockwell *et al.*, 2018), the performance of the phloem in leaves is still  
78 poorly understood. With a recent exception (Carvalho *et al.*, 2017a), detailed evaluations of  
79 phloem architecture in leaves with reticulate venation are lacking. This is in part due to the

80 challenging manipulations required to quantify the geometry of the sieve tubes in the tapering  
81 veins, as well as difficulties in evaluating the velocity of the sap inside the sieve tubes, typically  
82 measured by a fluorescent dye tracer (Jensen *et al.*, 2011, Etxeberria *et al.*, 2016) or radiolabeled  
83 compounds (Knoblauch *et al.*, 2016). Thus far, phloem sap velocities in leaves (including  
84 petioles) have been measured in only a handful of adult plant species (Jensen *et al.*, 2011), and in  
85 the seedlings of the family Cucurbitaceae (Savage *et al.*, 2013). Surprisingly, despite the critical  
86 interplay between development and physiological performance of woody plants during their  
87 ontogeny, comparisons between seedlings and adult plants have been missing so far.

88 The widely accepted mechanism of phloem transport is the differential osmotic gradient  
89 generated between sources and sinks (Münch, 1930; Thompson & Holbrook, 2003; Pickard,  
90 2012; Knoblauch & Peters, 2017), but the validity of this hypothesis has only recently been  
91 tested in herbaceous vines (Knoblauch *et al.*, 2016), and trees (Liesche *et al.*, 2017; Savage *et al.*,  
92 2017). In canopy dominant tree species, long distance geometrical scaling of the sieve elements  
93 of the phloem is conserved, resulting in a reduced resistivity of the individual collecting tubes  
94 towards the base of the tree (Savage *et al.*, 2017). Yet, understanding the overall flow capacity of  
95 the phloem requires quantification of sieve tube numbers alongside vascular tapering (i.e.  
96 tree/shrub branching). Sieve tube quantification has only been explored at single points of the  
97 stems in a few trees (Lawton & Canny, 1970; Ghouse *et al.*, 1976; Ghouse & Jamal, 1979; Khan  
98 *et al.*, 1992), but never comparing different stem diameters, essential to evaluate whole plant  
99 transport.

100 Pursuing these questions, we investigated the angiosperm shrub *Illicium parviflorum* to gain a  
101 better understanding of phloem structure and function in the aerial parts of plants adapted to  
102 understory environments and through their ontogeny. Despite a restricted distributional range in  
103 the tropics of America and Asia, the family Illicaceae is the largest within Austrobaileyales, one  
104 of the three lineages that compose the basal grade of flowering plants, only predated by  
105 Nymphaeales and the monotypic Amborellales (Mathews & Donoghue, 1999; Parkinson *et al.*,  
106 1999; Qiu *et al.*, 2000; Soltis *et al.*, 1999; 2018). Little is known of the phloem in these lineages  
107 (Bailey & Nast, 1948) and this information could bring insights into their growth patterns and  
108 ecological adaptations. Our results include a novel quantification of sieve tube element number

109 per cross sectional area of the stems and major veins of leaves, and characterization of phloem  
110 architectural traits related to the hydraulic efficiency of carbohydrate transport.

111

## 112 **MATERIALS AND METHODS**

### 113 **Plant materials and growth conditions**

114 Mature plants of *Illicium parviflorum* were grown in plastic pots in the greenhouses of the  
115 Arnold Arboretum of Harvard University, using high porosity growing medium PRO-MIX  
116 (PremierTech Horticulture and Agriculture Group, Riviere-du-Loup, QC, Canada), and under  
117 conditions of  $25\text{ }^{\circ}\text{C} \pm 2^{\circ}\text{C}$  and RH of 75% (Fig. 1). Plants were watered to field capacity every  
118 morning. Three seeds per pot were sown, and first seedlings (with two cotyledons) were visible  
119 four months after sowing. They were repotted individually and grown for three more months  
120 until the emergence of the first true leaves (approximately 3cm long), which were used for the  
121 measurements described below. Due to the understory habit of these plants and based on our  
122 previous observations, high sun exposure was avoided with a dark net between the greenhouse  
123 roof and the plants (average PAR  $100\text{ }\mu\text{mol m}^{-2}\text{ s}^{-1}$ ).

### 124 **Measurements of carbon assimilation**

125 Gas exchange was measured in three exposed leaves from three branches oriented in all  
126 directions in each mature plant (n=3 adult plants), as well as two leaves from each seedling (n=4  
127 seedlings). Measurements were done at three time points during the day (8:30am, 12:30am, and  
128 4:30pm), once per week during February and March 2017. We used a LI-COR 6400 (with light  
129 source) configured to track ambient PAR conditions at each measurement (average  $100\text{ }\mu\text{mol m}^{-2}\text{ s}^{-1}$ ).  
130 The reference  $\text{CO}_2$  was  $400\text{ }\mu\text{mol mol}^{-1}$ , the average leaf temperature  $20.0^{\circ}\text{C} \pm 0.16^{\circ}\text{C}$   
131 (SD), and vapor pressure deficit  $1.06 \pm 0.06\text{ kPa}$  (SD).

### 132 **Sample preparation for stem anatomy**

133 Due to the shrubby nature of mature *Illicium parviflorum* plants, lateral branches were divided  
134 into four stem diameter classes (see Fig. 1): <2mm (primary growth), 4-6mm (green shoots with  
135 secondary growth), 9-11mm (stems with bark), and >21mm (main stem). The length of each  
136 branch segment was measured, and the number and area of the leaves per unit length evaluated

137 (n=30). To observe changes in the vascular tissues with increasing stem diameters, 5-10cm long  
138 stem sections from each diameter class and three different plants were cut with clippers and kept  
139 in 1X Tris-buffered saline (TBS). 50 $\mu$ m thick cross-sections were then obtained with a Reichert-  
140 Jung Hn-40 sliding microtome (Austria), immediately mounted onto glass slides, and stained  
141 with a solution of 0.1% aniline blue PO<sub>4</sub> K<sub>3</sub> (Linskens & Esser, 1957), which stains callose of the  
142 sieve plates. Samples were observed with either a Zeiss Axiophot microscope with  
143 epifluorescence and an AxioCam 512 Color connected to the AxioVision software (Zeiss,  
144 Oberkochen, Germany), using the DAPI narrow filter band (excitation 365nm, bandpass 12 nm;  
145 dichroic mirror FT 395nm; barrier filter LP397nm). Individual images of the stem cross sections  
146 (taken with the 5x/0.15 Plan-Neofluar objective) were aligned and merged into a composite  
147 image to visualize and measure the areas of the whole stem with the Adobe Photoshop software  
148 (Adobe Systems Inc., Newton, MA, USA).

#### 149 **Evaluation of sieve tube geometry in stems**

150 To evaluate the length and the radius of the sieve tube elements, a second set of samples from the  
151 same stem diameters described above were hand-sectioned with a micro-scalpel, mounted on  
152 slides and stained with a mixture of 0.1% aniline blue in PO<sub>4</sub> K<sub>3</sub>, and 0.1% calcofluor white in  
153 10mM CHES buffer with 100mM KCl (pH=10), which stains the cellulose from the cell walls of  
154 the sieve tube elements, prior to microscopic observations.

155 In order to quantify the number of sieve tube elements, a third set of samples (2, 4, 6 and 11mm  
156 diameter) of about 0.5cm thickness were collected and then fixed in 4% acrolein (Polysciences  
157 Inc., Warrington, PA, USA) in a modified piperazine-N,N'-bis (2-ethanesulfonic acid) (PIPES)  
158 buffer adjusted to pH 6.8 (50 mM PIPES and 1 mM MgSO<sub>4</sub> from BDH, London, UK; and 5 mM  
159 EGTA from Research Organics Inc., Cleveland, OH, USA) for 24 hours, then rinsed thrice in the  
160 same buffer, and finally dehydrated through a series of increasing ethanol concentrations (10%,  
161 30%, 50%, 70%, 80%, and 100%), one hour each. Samples were incubated in the catalyzed  
162 solution of the resin Technovit 8100 (Electron Microscopy Sciences, Hatfield, PA, USA) for at  
163 least three months, and finally embedded under anoxic conditions and at 4°C. Later, blocks were  
164 mounted in microtome studs and serially sectioned at 4 $\mu$ m with a Leica RM2155 rotary  
165 Microtome (Leica Microsystems Inc., Germany). After mounting them in Superfrost slides, they  
166 were stained with aniline blue and calcofluor as described previously to quantify both the

167 number of sieve tube elements and the total number of cells per phloem sectional cluster (the  
168 areas of the phloem separated by ray parenchyma).

169 All samples were imaged with a Zeiss LSM700 Confocal Microscope (20x/0.8 M27 Plan-  
170 Apochromat objective for cross-sections and 63x/1.40 Oil DIC M27 Plan-Apochromat objective  
171 for longitudinal sections) using the 405nm laser band to excite the sample, and a Zen Black 2010  
172 software connected to a Zeiss HR camera to create the final compound tiles (Zeiss, Oberkoche,  
173 Germany). Serial tile images obtained from resin sections were aligned with the Adobe  
174 Photoshop software (Adobe Systems Inc., Newton, MA, USA), and then both parenchyma cells  
175 as well as sieve tube elements quantified. To estimate the total number of sieve tubes per stem  
176 diameter, we calculated the tube number per cluster area, multiplied by the calculated area of the  
177 phloem at each stem diameter. Note that this will slightly overestimate the number of sieve  
178 tubes, as the phloem clusters are separated by typically uniseriate rays.

#### 179 **Evaluation of sieve plate geometry**

180 To evaluate in detail the size of pores that make up the sieve plates, another batch of wood  
181 sections were cut and immediately frozen in liquid nitrogen, transferred to super-chilled ethanol,  
182 and then sectioned in the same orientation of the sieve plates at each diameter. After that, the cut  
183 sections were incubated within a mixture of 0.1% proteinase K dissolved in 50mM Tris-HCl  
184 buffer, 1.5mM Ca<sup>2+</sup> acetate and 8% Triton X-100, pH 8.0 (Mullendore *et al.*, 2010), using a  
185 water bath at 60°C for a period of two weeks. After rinsing with ethanol to deactivate the  
186 proteinase and washing them thrice with water, they were incubated with a 1% aqueous solution  
187 of  $\alpha$ -amylase for at least two days at 60°C, then rinsed thrice in water and finally freeze dried for  
188 24 hours. Following, samples were mounted on SEM studs, and sputter coated with gold-  
189 palladium using a Denton Vacuum Desk II Sputter Coater for 180 secs at 20Volts and 50militor  
190 pressure. Studs with samples coated with gold-palladium were imaged with a JEOL-6010LV  
191 scanning electron microscopy (SEM) (JEOL Inc., Peabody, Massachusetts, USA) using high  
192 vacuum and an accelerating voltage of 10-15kV. Pore size was evaluated in at least ten samples  
193 (n=50 pores) of the largest stem diameters (11mm and 21mm).

#### 194 **Sample preparation for leaf anatomy**

195 Transverse hand sections of the petiole, the midrib, and the secondary veins of mature *I.*  
196 *parviflorum* leaves were serially obtained, stained with aniline blue and calcofluor, and finally  
197 imaged with a confocal microscope (details below). To understand changes in the area of the  
198 xylem, phloem and sclerenchyma along the major vein of mature leaves, three sequential cross-  
199 sections of the petiole, the midrib and the tip of the major vein were obtained from five different  
200 mature leaves, then imaged and manually outlined with the Image J software (Supporting  
201 Information Fig. S1). Longitudinal sections of the same vein areas from the petiole, the midrib,  
202 second and third order veins were obtained from five different leaves and imaged with the  
203 protocol described below for quantification of length and radius of the sieve tube elements.

204 Due to the small size of leaves from seedlings, leaf material fixed in 4% acrolein, followed by  
205 embedding in Technovit 8100 prior to serial sectioning with a microtome as previously  
206 described. Variation among areas, sieve tube lengths, radius, and numbers from leaves were  
207 averaged and means compared among the different vein orders using a one way ANOVA and  
208 Tukey test at a  $P < 0.05$ . All statistical analysis were performed with SPSS software (SPSS Inc.,  
209 Chicago, USA).

### 210 **Measurements of phloem sap velocity**

211 Phloem transport velocity was measured by tracking the movement of the fluorescent dye  
212 carboxyfluorescein (CF) (reviewed in Knoblauch *et al.*, 2015), in the secondary veins of both  
213 living mature plants and seedlings at 11:00am each day. After saturating the soil with water,  
214 three mature plants and nine seedlings were taken to the lab and the leaves were immobilized to  
215 the microscope stage with the abaxial surface exposed upwards. A 10 $\mu$ L droplet of a mixture  
216 containing 0.01 M CF diacetate in 1:10 mixture of acetone and distilled, deionized water,  
217 supplemented with and 0.1% of the surfactant SilEnergy (RedRiver Specialties Inc., Shreveport,  
218 LA, USA) was applied with a micropipette to the distal most part of the secondary veins  
219 (adapted from Jensen *et al.*, 2011, Savage *et al.*, 2013). To allow a better permeabilization of the  
220 dye, the tip of the pipette was used to slightly abrade the thick cuticle, and the small window  
221 opened (approximately 1mm<sup>2</sup>) was covered with the liquid during the course of the experiment  
222 to prevent desiccation. To track the movement of the dye, we used a portable Stereo Microscope  
223 Fluorescence Adapter with 510-540nm excitation wavelength, and a long pass 600nm filter band  
224 (Nightsea, Lexington, MA, USA). Time-lapse images were obtained every ten seconds for a



225 period that spanned from 20 to 40 minutes with a Zeiss v12 Dissecting microscope using the  
226 0.63X PlanApo objective and an AxioCam 512 Color camera connected to the AxioVision  
227 software (Zeiss, Oberkochen, Germany). Velocity was calculated by tracking the time taken by  
228 the dye front to travel a known distance.

229

## 230 **RESULTS**

### 231 **Anatomy of the stems in *Illicium parviflorum***

232 *Illicium parviflorum* shrubs have numerous lateral branches and a short thicker stem (Fig. 1).  
233 Younger branches are green (2-10mm diameter) and support spirally arranged leaves, whereas  
234 older branches (>10mm diameter) are barky and seldom retain leaves. The length of the branches  
235 scales proportionally with their diameter, and thus the stems with 2mm diameter reach up to  
236 10cm long, whereas 6-10mm diameter stems extend through 50cm. While the ratio of leaf  
237 number to stem length is higher in the youngest stems ( $0.7 \pm 0.07SE$ ) compared with older ones  
238 ( $0.5 \pm 0.03SE$ ), the average leaf area increases from  $13.4cm^2$  in the thinner stems (2mm diameter,  
239 primary growth) to  $20.7cm^2$  in older ones (6mm diameter). Given the width-length relationship,  
240 we considered the diameter of the stem as a proxy to infer the distance from the base of the plant.

241 To understand the area that each tissue occupies in the cross section of the stems, we measured  
242 the radius of the ring formed by the cortex, the phloem, the xylem, and the pith, and calculated  
243 the area:  $A = \pi (R^2 - R_n^2)$ , being  $A$  area,  $R_n$  the radius of each ring tissue, and  $R$  the total radius of  
244 the stem. We then normalized these areas to the percentage of total cross sectional area occupied,  
245 which revealed a decreasing percentage of the cross sectional area occupied by the cortical tissue  
246 as the stems increase in diameter (Fig. 2a-c), and an opposite pattern for the xylem tissue.  
247 Strikingly, the proportion of the cross-sectional area occupied by the phloem tissue was  
248 maintained in all stem diameters evaluated (Fig. 2d). Because the phloem tissue is composed of  
249 clusters of sieve tubes and other cells separated by ray parenchyma, we quantified the proportion  
250 of sieve tubes per cluster in different stem diameters to infer the total number of tubes. While the  
251 proportion of conductive cells (number of sieve tubes/total number of phloem cells in each  
252 cluster) was maintained at approximately 30% in all of the stem diameters evaluated, the

253 estimated total number of sieve tubes increased linearly with stem diameter ( $r^2=0.99$ ;  $p<0.05$ ;  
254 Fig. 2d).

255 The morphology of the individual sieve tube elements further exhibit variation across stem  
256 diameters, increasing the number of sieve areas per plate connections between tubes as stem  
257 diameters increase (Fig. 3a-c). The length ( $l$ ) and radius ( $r$ ) of individual sieve tube element  
258 showed a logarithmic positive relationship with stem diameter ( $p<0.05$ ; Fig. 3d). Similarly, both  
259 the areas of sieve plates as well as their number follow a positive logarithmic relationship with  
260 stem diameter ( $p<0.05$ ; Fig. 3e). The average radius of sieve plate pores in the two large stem  
261 diameter classes was  $0.22\mu\text{m}^2 \pm 0.005$  SE. We were unable to quantify the pore size of smaller  
262 diameter stems because the sieve pores were occluded with an amorphous material.

### 263 **Leaf vascular anatomy in *Illicium parviflorum***

264 The mature leaves of *I. parviflorum* have reticulate venation; veins range from a small petiole  
265 (1cm long on average), midrib through fourth order veins, with higher vein orders difficult to  
266 disentangle (Fig. 4a). Cross sections of the major veins in leaves from adult plants revealed that  
267 both the phloem and the xylem organize in clusters of conduits, which are axially separated by  
268 rays of parenchymatous cells (Fig. 4b), similar to the organization observed in the stem  
269 vasculature. While the vascular tissue is mainly composed of xylem and phloem in the petiole, a  
270 sheath of thick-walled fibers surrounds the vasculature of the primary and higher order veins in  
271 the leaf lamina (Fig. 4c, d). Interestingly, despite the reduction in the total area occupied by the  
272 vascular tissues from the petiole towards the tip of the midrib (Fig. S1), the number of phloem  
273 and xylem cells in each cluster, as well as their respective lumen areas, is maintained along the  
274 entire midrib (Fig. S2). These results suggest that the increase in the conductive areas of the  
275 major vein towards the petiole is due solely to the increasing number of vascular clusters, and  
276 thus conduits. But it also points to the intercalary growth of the leaf ray parenchyma as a major  
277 cause of vein tapering. Although the 1:1 xylem-phloem cell number maintains at the secondary  
278 veins, their number and lumen areas are reduced by almost an order of magnitude compared with  
279 the major vein. Leaf vasculature is markedly different in seedlings, where the xylem and phloem  
280 cells are still differentiating. Between them, several rows of square and thin walled cells likely  
281 correspond with cambial tissue (Fig. 4f-h).

282 Quantifications of the length and radius of sieve tube elements in leaves of *Illicium parviflorum*  
283 reveals that both parameters decrease from the major vein to the higher order veins (Fig. 5a), yet  
284 their dimensions are conserved between the midrib and the petiole (Fig. 5b). Unfortunately,  
285 detecting the sieve tube elements at fourth vein orders was impossible due to the massive  
286 presence of sieve areas along their lateral cell walls (Fig. 5c). Strikingly, the sieve tube elements  
287 of the leaves from seedlings were longer and wider compared with mature leaves (Fig. 5d,e).

### 288 **Assimilation rates and phloem sap velocity**

289 Photosynthetic activity was not significantly different between adult plants and seedlings of  
290 *Illicium parviflorum*. Maximum rates of 4-5  $\mu\text{mol CO}_2 \text{ m}^{-2} \text{ s}^{-1}$  were observed at midday (Fig. 6).  
291 To evaluate the velocity of transport through the phloem, we monitored the fluorescence front of  
292 a dye tracer along the secondary veins of both adult plants and seedlings (Fig. 7). While this  
293 velocity was very low for adult plants,  $4.94 \pm 1.10 \mu\text{m s}^{-1}$  (n=3) (compared with other  
294 angiosperm species), the veins of seedlings exhibited a velocity that was nearly three times  
295 higher ( $14.44 \pm 1.70 \mu\text{m s}^{-1}$ ), pointing to a regulation of sap flow velocity through the phloem in  
296 *I. parviflorum* plants depending on their developmental stage.

### 297 **Sieve tube hydraulic resistance in stems and leaves**

298 From the collected anatomical data, we computed the hydraulic resistance of sieve tubes from  
299 thinner and shorter branches, which have the smallest tubes, to the stems at the base of the shrub,  
300 which exhibit the widest diameters and bigger sieve tubes. Sieve tube resistance can be  
301 expressed as  $R_{\text{tube}} = R_{\text{lumen}} + R_{\text{plate}}$ .  $R_{\text{lumen}}$  depends on both the geometry of the tubes themselves and  
302 the viscosity of the sap flowing within, which we assume here as  $\eta = 1.7 \text{ mPa}$ , an estimate  
303 obtained in previous measurements (Knoblauch *et al.*, 2016).  $R_{\text{plate}}$  is determined by the number  
304 and size of sieve pores (Jensen *et al.*, 2012), with pore radius the most influential parameter  
305 affecting resistance (see also Jensen *et al.*, 2014; Savage *et al.*, 2017). Note that because we were  
306 unable to measure the pore diameters of the smaller stems, for our calculations we assume that  
307 pore size does not vary.

308 Sieve tube hydraulic resistance per length in *I. parviflorum* has an inverse relationship with the  
309 diameter of the stems (Fig. 8a), but the magnitude of this decrease is modest compared to  
310 patterns recently reported for trees (Savage *et al.*, 2017). To understand the influence of this

311 decreasing resistance on the pressure required to drive sap flow in the leaves, we used the  
312 resistor analogy recently applied to trees (Savage *et al.*, 2017). This model assumes that the  
313 differential pressure across transport length  $L$  is proportional to the hydraulic resistance per  
314 length of sieve tubes [ $R$  ( $\text{Pa s m}^{-4}$ )] and the sap flow rate [ $Q$  ( $\text{m}^3\text{s}^{-1}$ )] expressed as  $\Delta p/L = QR$ .  
315 We calculated  $\Delta p$  across a transport length ( $L$ ) for different diameter stems, assuming a constant  
316 linear flow velocity ( $U$ ), and the average sieve element radius ( $r$ ) and length ( $l$ ), and our estimate  
317 of sieve tube resistance [ $R_{\text{tube}}$  ( $\text{Pa s m}^{-3}$ )]:

$$\Delta p = \frac{\pi r^2 U L R_{\text{tube}}}{l}$$

318 Assuming the phloem sap velocity measured in mature plants ( $5 \mu\text{m s}^{-1}$ ), the differential pressure  
319 required to transport sap in a 1-m-long branch is very low (0.05MPa for the smallest branch  
320 diameters). Thus, with a fixed viscosity and relatively low pressures, the small branches of  
321 *Illicium parviflorum* could be much longer without compromising carbohydrate transport. The  
322 higher phloem sap velocity measured in seedlings implies that the pressure required to transport  
323 the same distance would increase, yet the estimated pressure difference (0.16 MPa) is within the  
324 range of most measured angiosperms. It has to be noted that seedlings, similar to younger  
325 branches, rarely reach lengths longer than 0.05m without widening their stems.

326 Using the geometrical parameters of the sieve tube elements from leaves, we evaluated the  
327 lumen hydraulic resistance in different vein orders (Fig. 8b). As in the stems, phloem hydraulic  
328 resistance decreased by over an order of magnitude from tertiary veins to the petiole.

329

## 330 **DISCUSSION**

### 331 **Scaling of phloem geometry in the stems of *Illicium parviflorum***

332 The current work shows that the increase in stem diameter in *I. parviflorum* towards the base of  
333 the shrub correlates with a developmental scaling of sieve tube structure. Comparable values of  
334 length and width of the sieve tubes have been only recently reported in angiosperm trees,  
335 pointing to a conserved mechanism associated with attainment of an arborescent growth form  
336 (Liesche *et al.*, 2017; Savage *et al.*, 2017). However, pore sizes of the sieve plates were  
337 substantially smaller in *Illicium*. The pore areas of the sieve plates have been estimated as the

338 most influential parameter affecting sap flow resistance within sieve tube (Esau *et al.*, 1962;  
339 Mullendore *et al.*, 2010; Jensen *et al.*, 2012). Thus, the decreased resistance of the phloem  
340 towards the base of the shrubs in *Illicium* is mainly caused by the scaling of geometrical  
341 properties of the sieve tube elements, but especially the increasing number of sieve areas per  
342 plate in the sieve tube end walls. If this holds true for other basal angiosperms, small pore size  
343 could be an ancestral feature of woody flowering plants related with a high phloem resistance,  
344 which is consistent the high xylem resistance associated with the low density of vessels  
345 previously reported in the wood (Feild *et al.*, 2003a; 2004; Feild *et al.*, 2009).

346 Interestingly, the proportional cross-sectional area of the phloem in different stem diameters of  
347 *I. parviflorum* is conserved, contrasting with the reduction of cortical tissue, as well as the  
348 increase in xylem tissue. The scaling of xylem elements towards the base of woody angiosperms,  
349 as well as their increase in number have been widely studied (Sevanto *et al.*, 2011; Hölttä *et al.*,  
350 2006; 2009; 2013; Petit & Crivellaro, 2014; Diaz-Espejo & Hernandez-Santana, 2017). This is  
351 because anatomical quantification of vessels in cross section is straightforward, whereas  
352 counting the sieve tube elements is more challenging. Due to the paired structure-function  
353 relationship between the phloem and the xylem (reviewed in Savage *et al.*, 2016; Seleznyova &  
354 Hanan, 2018), understanding hydraulic transport in woody organisms requires a better  
355 understanding of sieve tube numbers along the plant, so far missing in woody lineages. Previous  
356 sieve tube number estimations were based on single point measurements in the stems, such as the  
357 2/3 sieve tube proportion (number of sieve tubes relative to total phloem cells) inferred by  
358 Münch (Münch, 1930), which was later challenged by quantifications of sieve tubes in the stems  
359 of other angiosperm trees, such as the 12-26% in six *Cassia* species (Ghouse & Jamal, 1979), 17-  
360 35% in members of the Myrtaceae family (Ghouse *et al.*, 1976), 54-74% in *Sterculia tragantha*  
361 and *Bombax bounopozense* (Lawton & Canny, 1970), or 11-59% in leguminous trees (Khan *et*  
362 *al.*, 1992). These single point measurements offer only a partial picture (see also Canny, 1973).  
363 Here, we use serial sections to estimate the total number of sieve tubes per cross sectional area of  
364 the stem at different positions along the plant. While the proportion of conductive elements per  
365 phloem cluster (30%), are maintained in all stem diameters in *Illicium parviflorum*, consistent  
366 with the similar proportion of vessels in the xylem (Feild *et al.*, 2003a), the total number of  
367 conductive tubes increases linearly with stem diameter. Interestingly, in stems with primary  
368 growth, the average leaf area supplying photosynthates doubles from thinner to thicker stems and

369 the estimated number of sieve tubes follows a similar trend. The lack of sieve tube number  
370 quantification across different stem diameters in the majority of woody angiosperms hampers a  
371 comparative framework with our data, and even though future works will elucidate whether this  
372 pattern shows consistency across woody plants, our results point to a critical spatial-temporal  
373 regulation of sieve tube number and size in stems.

#### 374 **Phloem scaling in leaf veins of *I. parviflorum***

375 Unlike in the stems, mature leaves of *Illicium parviflorum* show a similar number of vascular  
376 elements of both xylem and the phloem, a relationship that appears to be conserved across vein  
377 orders. These results are consistent with the idea of a physiological dependence between xylem  
378 and phloem (Zwieniecki *et al.*, 2004; Sevanto *et al.*, 2011; Hölttä *et al.*, 2013), but contrast with  
379 recent measurements in herbaceous plants (Ray & Jones, 2018). Additionally, the proportion of  
380 sieve tubes examined in the petioles of herbaceous species vary substantially, from the roughly  
381 30% of sieve tubes in *Beta vulgaris* (Geiger *et al.*, 1969), to 17% and 23% of *Cucurbita* species  
382 and potato tubers respectively (Crafts, 1931; 1933). While this has consequences for mass  
383 transfer from the leaves to the stems, the 1:1 relationship between the phloem and the xylem in  
384 the leaves of *I. parviflorum* implies that the increasing total conductive area of the xylem and  
385 phloem in the major veins results from a higher number of conduits towards the petiole, similar  
386 to the described reduction in phloem conduit number in the singled veined needles of pines  
387 (Ronellenfitch *et al.*, 2015). In addition, different vein hierarchies in the leaves of *I. parviflorum*  
388 display a scaling relationship of sieve tubes that is similar to what was recently reported for the  
389 reticulate veined leaves of poplar (Carvalho *et al.*, 2017a) and the dichotomously veined *Ginkgo*  
390 (Carvalho *et al.*, 2017b). However, the sieve tube elements are shorter and thinner at the petiole  
391 in *Illicium parviflorum* leaves than within the leaf veins. Shorter sieve tubes in the phloem of the  
392 petiole may have implications for the regulation of pressure within the sieve tubes in leaves,  
393 especially at the times of maximum turgidity (i.e. maximum sugar export rates). We observed a  
394 higher number of sieve areas in the plates connecting the sieve tubes in the petiole, thus this  
395 feature may attenuate at least in part a putative pressure increase (Carvalho *et al.*, 2018). It would  
396 be desirable to obtain pore size in the sieve tubes of different vein orders and therefore check  
397 whether it concords with the hydraulic models for energy conservation, such as the da Vinci's or  
398 Murray's rules (Murray, 1926; Richter, 1980; McCulloh *et al.*, 2003). Nevertheless, the role of

399 the petiole regulating sugar export from leaves has not been extensively explored across  
400 angiosperms and requires further attention (Grimm *et al.*, 1997; Ray & Jones, 2018).

401 The directional flow in the sieve tubes of the major veins in *Illicium* leaves contrasts with the  
402 anatomy of the sieve tubes in the minor veins, where numerous sieve areas pervade their lateral  
403 walls. This is in line with the idea of a division of function between the minor veins, which  
404 mainly work as sugar loaders, and major veins, where directional transport occurs within leaves  
405 (Russin & Evert, 1985; Turgeon, 2006; Carvalho *et al.*, 2017a, 2018). A high number of  
406 symplasmic connections typically associate with passive sugar loading in the minor veins (van  
407 Bel *et al.*, 1992; Turgeon, 1996; Gamalei *et al.*, 2000; Rennie & Turgeon, 2009; Turgeon, 2010;  
408 Davidson *et al.*, 2011; Zhang *et al.*, 2014), but the heterogeneity of the species evaluated leave  
409 this question still unresolved (Slewiniski *et al.*, 2013). So far, sugar (radio) labeling appears as the  
410 most reliable measure of loading type, which has yet to be applied to *Illicium parviflorum* leaves.  
411 As a member of the basal grade of flowering plants, *Illicium* could likely fit with the previously  
412 hypothesized passive sugar loading in woody angiosperms of the understory (Gamalei, 1989;  
413 1991). However, this feature appears to be labile among the extant members of the basal  
414 angiosperm grade, such as the active loading reported for *Amborella* (Turgeon & Medville,  
415 2011; Comtet *et al.*, 2017).

#### 416 **Developmental flexibility and carbon limitation at the sources in the understory**

417 Our estimations of the turgor pressures required to drive sap transport in *I. parviflorum* are  
418 within the range of osmotic values for phloem sap reported for a wide range of species (Jensen *et*  
419 *al.*, 2013). These measurements thus support the validity of the Münch hypothesis (Münch,  
420 1930) as the mechanism of sugar transport in understory shrubs, consistent with models of  
421 phloem transport in both angiosperm and gymnosperm trees (Thompson & Holbrook, 2003;  
422 Liesche *et al.*, 2015; Jyske & Holttta, 2015; De Schepper *et al.*, 2013; Comtet *et al.*, 2017).  
423 However, our calculations indicate that even without increases in stem diameter, *I. parviflorum*  
424 branches could reach significant lengths without compromising phloem transport.

425 In addition, our evaluations of carbon low assimilation rates in greenhouse conditions are  
426 consistent with the low *in situ* measurements previously reported in the field (Feild *et al.*,  
427 2003a,b; 2004; Feild *et al.*, 2009). Interestingly, the size of sieve tube elements, both diameter  
428 and length, in the major veins of the leaves of seedlings are approximately three times larger than

429 in mature leaves. In parallel, the measured velocity of sap in the seedlings is threefold higher  
430 than that of adult leaves, suggesting a functional flexibility of the phloem through ontogeny.  
431 Faster transport rates through the phloem of saplings would imply a more efficient transporting  
432 of sugars during rapid sun flecks, which account for one third of the total photosynthesis in the  
433 tropical understory (Pearcy, 1987). While phloem velocity of seedlings and adult plants has only  
434 been evaluated in a single herbaceous species (Savage *et al.*, 2013), they observed variable  
435 phloem sap velocity in seedlings depending on the bundle and developmental stage. However,  
436 whether this developmental dynamism is consistent across flowering plants requires further  
437 investigations.

### 438 **Phloem dynamics and the ecophysiology of early angiosperms**

439 Despite the understory origins of woody angiosperms, organismal scaling of sieve tube elements  
440 of the phloem appears as a conserved mechanism that predates the origin of woody flowering  
441 plants, and likely seed plants in general (see Woodruff *et al.*, 2004; Liesche *et al.*, 2015; Liesche,  
442 2017). Angiosperm colonization of the vertical niche implied a number of structural innovations  
443 that led to a higher functional efficiency and thus productivity (Koch *et al.*, 2004; Savage *et al.*,  
444 2017; Gleason *et al.*, 2018). However, our knowledge on phloem functioning in the extant  
445 lineages of the basal angiosperm grade is still in its infancy. We hereby reported for the first time  
446 a detailed evaluation of phloem anatomy and physiology in a member of the basal-grade of  
447 angiosperms, offering a developmental angle that may help to explain the plasticity of the  
448 phloem in the light-limited environments where these lineages likely evolved. With respect to the  
449 phloem of adult plants, the major structural difference between the sieve tubes of *I. parviflorum*  
450 and those found in angiosperm trees is their much smaller sieve plate pores. This suggests that  
451 evolutionary changes in sieve tube structure could have critically influenced the structure and  
452 functioning of forest ecosystems.

453 Extant angiosperm taxa composing the basal-branch lineages of flowering plants are no more  
454 than 220 species, yet the spectrum of their life forms range from aquatic herbaceous (the whole  
455 Nymphaeales clade), to shrubs and lianas of the tropical understory in both the monotypic  
456 Amborellales and the Austrobaileyales. From a physiological perspective, inferring the evolution  
457 of physiological performance during angiosperm radiation has typically been carried out from a  
458 single organ perspective, such as leaves (Brodrigg & Feild, 2010) or vascular traits of the xylem



459 in mature plants (Feild & Arens, 2005, 2007). However, broader reconstruction of ancestral  
460 ecophysiological traits further requires organismal and developmental approaches, especially  
461 from the perspective of the understudied phloem tissue. This is particularly relevant in plants that  
462 acquired arborescent forms, since their size requires efficient internal transport tissues and they  
463 play an outsize role in structuring forest ecosystems. We propose that developmental and  
464 organismal heterogeneity of sieve tube elements across extant member of the basal angiosperm  
465 grade (see Behnke, 1986) are key elements for the reconstruction of traits that compose different  
466 strata in ancestral and contemporary forests. Thus, suites of functional vascular traits including  
467 perforation plates of the xylem ((Feild and Wilson, 2012), as well as sieve plates of the phloem,  
468 may have been selected during early angiosperm evolution, allowing woody flowering plants to  
469 extend beyond their understory origins.

470

#### 471 **Acknowledgements:**

472 This work was funded by the National Science Foundation IOS 1456682 research grant to NMH.  
473 We are very grateful to William E. (Ned) Friedman for kindly sharing plant material and lab  
474 facilities, as well as the staff of the Arnold Arboretum of Harvard University for continuous  
475 support. We are thankful to Yongjiang Zhang for helping with LI-COR measurements, as well as  
476 Jessica Gersony and Kasia Ziemska for their thoughtful feedback on the manuscript.

477

#### 478 **Author contributions:**

479 NMH conceived the project, supervised the experiments and data, and wrote the manuscript.

480 JML designed and performed the experiments, analyzed the data, and wrote the manuscript.

481

#### 482 **References:**

483 **Bailey IW, Nast CG. 1948.** Morphology and relationships of *Illicium*, *Schisandra* and *Kadsura*:  
484 I. Stem and leaf. *Journal of the Arnold Arboretum* **29**: 77–89.

- 485 **Barral A, Gomez B, Feild TS, Coiffard C, Daviero-Gomez V. 2013.** Leaf architecture and  
486 ecophysiology of an early basal eudicot from the Early Cretaceous of Spain. *Botanical Journal*  
487 *of the Linnean Society* **173**: 594–605.
- 488 **Behnke H. 1986.** Sieve element characters and the systematic position of *Austrobaileya*,  
489 *Austrobaileyaceae* —with comments to the distinction and definition of sieve cells and sieve-  
490 tube members. *Plant Systematics and Evolution* **152**: 101–121.
- 491 **Boyce CK, Lee JE. 2017.** Plant evolution and climate over geological timescales. *Annual*  
492 *Review of Earth and Planetary Sciences* **45**: 61–87.
- 493 **Brodribb TJ, Feild TS. 2010.** Leaf hydraulic evolution led a surge in leaf photosynthetic  
494 capacity during early angiosperm diversification. *Ecology letters* **13**: 175–183.
- 495 **Canny MJ. 1973.** *Phloem translocation*. Cambridge, UK: University Press.
- 496 **Carlquist S. 1982.** Wood anatomy of *Illicium* (Illiciaceae): phylogenetic, ecological, and  
497 functional interpretations. *American Journal of Botany* **60**: 1587–1598.
- 498 **Carlquist S, Schneider EL. 2002.** Vessels of *Illicium* (Illiciaceae): range of pit membrane  
499 remnant presence in perforations and other vessel details. *International Journal of Plant Sciences*  
500 **163**: 755–763.
- 501 **Carpenter KJ. 2005.** Stomatal architecture and evolution in basal angiosperms. *American*  
502 *Journal of Botany* **92**: 1595–1615.
- 503 **Carvalho MR, Losada JM, Niklas KJ. 2018.** Phloem networks in leaves. *Current Opinion in*  
504 *Plant Biology* **43**: 29–35.
- 505 **Carvalho MR, Turgeon R, Owens T, Niklas KJ. 2017a.** The scaling of the hydraulic  
506 architecture in poplar leaves. *New Phytologist* **214**: 145–157.
- 507 **Carvalho MR, Turgeon R, Owens T, Niklas KJ. 2017b.** The hydraulic architecture of *Ginkgo*  
508 leaves. *American Journal of Botany* **104**: 1285–1298.
- 509 **Coiffard C, Gomez B, Kvaček J, Thévenard F. 2006.** Early angiosperm ecology: evidence  
510 from the Albian-Cenomanian of Europe. *Annals of Botany* **98**: 495–502.

- 511 **Comtet J, Turgeon R, Stroock A. 2017.** Phloem loading through plasmodesmata: a biophysical  
512 analysis. *Plant Physiology* **175**: 904–915.
- 513 **Crafts AS. 1931.** Movement of organic materials in plants. *Plant Physiology* **6**: 1–41.
- 514 **Crafts AS. 1933.** Sieve-tube structure and translocation in the potato. *Plant Physiology* **8**: 81–  
515 104.
- 516 **Davidson A, Keller F, Turgeon R. 2011.** Phloem loading, plant growth form, and climate.  
517 *Protoplasma* **248**: 153–163.
- 518 **De Schepper V, De Swaef T, Bauweraerts I, Steppe K. 2013.** Phloem transport: a review of  
519 mechanisms and controls. *Journal of Experimental Botany* **64**: 4839–4850.
- 520 **Diaz-Espejo A, Hernandez-Santana V. 2017.** The phloem–xylem consortium: until death do  
521 them part. *Tree Physiology* **37**: 847–850.
- 522 **Esau K, Cheadle VI, Risley EB. 1962.** Development of sieve-plate pores. *Botanical Gazette*  
523 **123**: 233–243.
- 524 **Etxeberria E, González P, Borges AF, Brodersen C. 2016.** The use of laser light to enhance  
525 the uptake of foliar-applied substances into citrus (*Citrus sinensis*) leaves. *Applications in Plant*  
526 *Sciences* **4**: 1500106.
- 527 **Feild TS, Arens NC. 2005.** Form, function and environments of the early angiosperms: merging  
528 extant phylogeny and ecophysiology with fossils. *New Phytologist* **166**: 383–408.
- 529 **Feild TS, Arens NC. 2007.** The ecophysiology of early angiosperms. *Plant, Cell & Environment*  
530 **30**: 291–309.
- 531 **Feild TS, Arens NC, Dawson TE. 2003a.** The ancestral ecology of angiosperms: emerging  
532 perspectives from extant basal lineages. *International Journal of Plant Sciences* **164**: S129–  
533 S142.
- 534 **Feild TS, Arens NC, Doyle JA, Dawson TE, Donoghue MJ. 2004.** Dark and disturbed: a new  
535 image of early angiosperm ecology. *Paleobiology* **30**: 82–107.
- 536 **Feild TS, Chatelet DS, Brodribb TJ. 2009.** Ancestral xerophobia: a hypothesis on the whole  
537 plant ecophysiology of early angiosperms. *Geobiology* **7**: 237–264.

- 538 **Feild TS, Franks PJ, Sage TL. 2003b.** Ecophysiological shade adaptation in the basal  
539 angiosperm, *Austrobaileya scandens* (Austrobaileyaceae). *International Journal of Plant*  
540 *Sciences* **164**: 313–324.
- 541 **Feild TS, Wilson JP. 2012.** Evolutionary voyage of angiosperm vessel structure-function and its  
542 significance for early angiosperm success. *International Journal of Plant Sciences* **173**: 596–609.
- 543 **Gamalei Y. 1989.** Structure and function of leaf minor veins in trees and herbs. *Trees* **3**: 96–110.
- 544 **Gamalei Y. 1991.** Phloem loading and its development related to plant evolution from trees to  
545 herbs. *Trees* **5**: 50–64.
- 546 **Gamalei YV, Pakhomova MV, Syutkina AV, Voitsekhovskaja OV. 2000.** Compartmentation  
547 of assimilate fluxes in leaves. *Plant Biology* **2**: 98–106.
- 548 **Geiger DR, Saunders MA, Cataldo DA. 1969.** Translocation and accumulation of translocate  
549 in the sugar beet petiole. *Plant Physiology* **44**: 1657–1665.
- 550 **Ghouse AKM, Khan MIH, Khan S. 1976.** Amount of sieve elements in the secondary phloem  
551 of some Myrtaceae. *Flora* **165**: 489–492.
- 552 **Ghouse AKM, Jamal A. 1979.** Sieve-tube proportion in the secondary phloem of some *Cassia*  
553 species. *Bulletin de la Société Botanique de France. Lettres Botaniques* **126**: 207–211.
- 554 **Gleason SM, Stephens AE, Tozer WC, Blackman CJ, Butler DW, Chang Y, Cook AM,**  
555 **Cooke J, Laws CA, Rosell JA et al. 2018.** Shoot growth of woody trees and shrubs is predicted  
556 by maximum plant height and associated traits. *Functional Ecology* **32**: 247–259.
- 557 **Grimm E, Jahnke S, Rothe K. 1997.** Photoassimilate translocation in the petiole of *Cyclamen*  
558 and *Primula* is independent of lateral retrieval. *Journal of Experimental Botany* **48**: 1087–1094.
- 559 **Hickey LJ, Doyle JA. 1977.** Early Cretaceous fossil evidence for angiosperm evolution.  
560 *Botanical Review* **43**: 3–104.
- 561 **Hölttä T, Kurppa M, Nikinmaa E. 2013.** Scaling of xylem and phloem transport capacity and  
562 resource usage with tree size. *Frontiers in Plant Science* **4**: 496.
- 563 **Hölttä T, Mencuccini M, Nikinmaa E. 2009.** Linking phloem function to structure: analysis  
564 with a coupled xylem–phloem transport model. *Journal of Theoretical Biology* **259**: 325–337.

- 565 **Hölttä T, Vesala T, Sevanto S, Perämäki M, Nikinmaa E. 2006.** Modeling xylem and phloem  
566 water flows in trees according to cohesion theory and Münch hypothesis. *Trees* **20**: 67–78.
- 567 **Jensen KH, Lee J, Bohr T, Bruus H, Holbrook NM, Zwieniecki MA. 2011.** Optimality of the  
568 Münch mechanism for translocation of sugars in plants. *Journal of the Royal Society Interface* **8**:  
569 1155–1165.
- 570 **Jensen KH, Liesche J, Bohr T, Schulz A. 2012a.** Universality of phloem transport in seed  
571 plants. *Plant, Cell & Environment* **35**: 1065–1076.
- 572 **Jensen KH, Mullendore DL, Holbrook NM, Bohr T, Knoblauch M, Bruus H. 2012b.**  
573 Modeling the hydrodynamics of phloem sieve plates. *Frontiers in Plant Science* **3**: 151.
- 574 **Jensen KH, Savage JA, Holbrook NM. 2013.** Optimal concentration for sugar transport in  
575 plants. *Journal of the Royal Society Interface* **10**: 20130055.
- 576 **Jensen KH, Valente AX, Stone HA. 2014.** Flow rate through microfilters: influence of the pore  
577 size distribution, hydrodynamic interactions, wall slip, and inertia. *Physics of Fluids* **26**: 052004.
- 578 **Jyske T, Hölttä T. 2015.** Comparison of phloem and xylem hydraulic architecture in *Picea*  
579 *abies* stems. *New Phytologist* **205**: 102–115.
- 580 **Khan MA, Kalimulla A, Ahmad Z. 1992.** Area occupied by sieve elements in the secondary  
581 phloem of some leguminous forest trees of Madhya Pradesh, India. *Flora* **186**: 311–315.
- 582 **Knoblauch M, Knoblauch J, Mullendore DL, Savage JA, Babst BA, Beecher SD, Dodgen**  
583 **AC, Jensen KH, Holbrook NM. 2016.** Testing the Münch hypothesis of long distance phloem  
584 transport in plants. *Elife* **5**: e15341.
- 585 **Knoblauch M, Peters WS. 2017.** What actually is the Münch hypothesis? A short history of  
586 assimilate transport by mass flow. *Journal of Integrative Plant Biology* **59**: 292–310.
- 587 **Knoblauch M, Vendrell M, de Leau E, Paterlini A, Knox K, Ross-Elliot T, Reinders A,**  
588 **Brockman SA, Ward J, Oparka K. 2015.** Multispectral phloem-mobile probes: properties and  
589 applications. *Plant Physiology* **167**: 211–220.
- 590 **Koch GW, Sillett SC, Jennings GM, Davis SD. 2004.** The limits to tree height. *Nature* **428**:  
591 851–854.

- 592 **Lawton JRS, Canny MJ. 1970.** The proportion of sieve elements in the phloem of some  
593 tropical trees. *Planta* **95**: 351–354.
- 594 **Liesche J. 2017.** Sucrose transporters and plasmodesmal regulation in passive phloem loading.  
595 *Journal of Integrative Plant Biology* **59**: 311–321.
- 596 **Liesche J, Pace MR, Xu Q, Li Y, Chen S. 2017.** Height-related scaling of phloem anatomy and  
597 the evolution of sieve element end wall types in woody plants. *New Phytologist* **214**: 245–256.
- 598 **Liesche J, Windt C, Bohr T, Schulz A, Jensen KH. 2015.** Slower phloem transport in  
599 gymnosperm trees can be attributed to higher sieve element resistance. *Tree Physiology* **35**: 376–  
600 386.
- 601 **Linskens HF, Esser KL. 1957.** Über eine spezifische anfärbung der pollenschläuche im griffel  
602 und die zahl der kallosepfropfen nach selbststungund fremdung. *Naturwissenschaften* **44**: 16–16.
- 603 **Mathews S, Donoghue MJ. 1999.** The root of angiosperm phylogeny inferred from duplicate  
604 phytochrome genes. *Science* **286**: 947–950.
- 605 **McCulloh KA, Sperry JS, Adler FR. 2003.** Water transport in plants obeys Murray's law.  
606 *Nature* **421**: 939–942.
- 607 **Mullendore DL, Windt CW, Van As H, Knoblauch M. 2010.** Sieve tube geometry in relation  
608 to phloem flow. *The Plant Cell* **22**: 579–593.
- 609 **Münch E. 1930.** *Die stoffbewegungen in der pflanze*. Jena, Germany: G. Fischer.
- 610 **Murray CD. 1926.** The physiological principle of minimum work. I. The vascular system and  
611 the cost of blood volume. *Proceedings of the National Academy of Sciences-USA* **12**: 207–214.
- 612 **Nikinmaa E, Hölttä T, Hari P, Kolari P, Mäkelä A, Sevanto S, Vesala T. 2013.** Assimilate  
613 transport in phloem sets conditions for leaf gas exchange. *Plant, Cell & Environment* **36**: 655–  
614 669.
- 615 **Parkinson CL, Adams KL, Palmer JD. 1999.** Multigene analyses identify the three earliest  
616 lineages of extant flowering plants. *Current Biology* **9**: 1485–1491.

- 617 **Pearcy RW. 1987.** Photosynthetic gas exchange responses of Australian tropical forest trees in  
618 canopy, gap and understory micro-environments. *Functional Ecology* **1**: 169–178.
- 619 **Petit G, Crivellaro A. 2014.** Comparative axial widening of phloem and xylem conduits in  
620 small woody plants. *Trees* **28**: 915–921.
- 621 **Pickard WF. 2012.** Münch without tears: a steady-state Münch-like model of phloem so  
622 simplified that it requires only algebra to predict the speed of translocation. *Functional Plant*  
623 *Biology* **39**: 531–537.
- 624 **Qiu YL, Lee J, Bernasconi-Quadroni F, Soltis DE, Soltis PS, Zanis M, Zimmer EA, Chen Z,**  
625 **Savolainen V, Chase MW. 2000.** Phylogeny of basal angiosperms: analyses of five genes from  
626 three genomes. *International Journal of Plant Sciences* **161**:S3–S27.
- 627 **Ray DM, Jones CS. 2018.** Scaling relationships and vessel packing in petioles. *American*  
628 *Journal of Botany*. doi: 10.1002/ajb2.1054.
- 629 **Rennie EA, Turgeon R. 2009.** A comprehensive picture of phloem loading strategies.  
630 *Proceedings of the National Academy of Sciences-USA* **106**: 14162–14167.
- 631 **Richter IA. 1980.** *The Notebooks of Leonardo da Vinci*. Oxford, UK: University Press.
- 632 **Ronellenfitsch H, Liesche J, Jensen KH, Holbrook NM, Schulz A, Katifori E. 2015.** Scaling  
633 of phloem structure and optimality of photoassimilate transport in conifer needles. *Proceedings*  
634 *of the Royal Society B-Biological Sciences* **282**: 20141863.
- 635 **Russin WA, Evert RF. 1985.** Studies on the leaf of *Populus deltoides* (Salicaceae):  
636 ultrastructure, plasmodesmatal frequency, and solute concentrations. *American Journal of*  
637 *Botany* **72**: 1232–1247.
- 638 **Savage JA, Beecher S, Clerx L, Gersony JT, Knoblauch J, Losada JM, Jensen KH,**  
639 **Knoblauch M, Holbrook NM. 2017.** Maintenance of carbohydrate transport in tall trees. *Nature*  
640 *Plants* **3**: 965.
- 641 **Savage JA, Clearwater MJ, Haines DF, Klein T, Mencuccini M, Sevanto S, Turgeon R,**  
642 **Zhang C. 2016.** Allocation, stress tolerance and carbon transport in plants: how does phloem  
643 physiology affect plant ecology? *Plant, Cell & Environment* **39**: 709–725.

- 644 **Savage JA, Zwieniecki MA, Holbrook NM. 2013.** Phloem transport velocity varies over time  
645 and among vascular bundles during early cucumber seedling development. *Plant Physiology*  
646 **163**: 1409–1418.
- 647 **Seleznyova AN, Hanan J. 2018.** Mechanistic modelling of coupled phloem/xylem transport for  
648 L-systems: combining analytical and computational methods. *Annals of Botany* **121**: 991–1003.
- 649 **Sevanto S, Hölttä T, Holbrook NM. 2011.** Effects of the hydraulic coupling between xylem  
650 and phloem on diurnal phloem diameter variation. *Plant, Cell & Environment* **34**: 690–703.
- 651 **Slewinski TL, Zhang C, Turgeon R. 2013.** Structural and functional heterogeneity in phloem  
652 loading and transport. *Frontiers in Plant Science* **4**: 244.
- 653 **Soltis D, Soltis P, Endress P, Chase MW, Manchester S, Judd W, Majure L, Mavrodiev E.**  
654 **2018.** *Phylogeny and evolution of the Angiosperms: revised and updated edition*. Chicago, USA:  
655 University Press.
- 656 **Soltis PS, Soltis DE, Chase MW. 1999.** Angiosperm phylogeny inferred from multiple genes as  
657 a tool for comparative biology. *Nature* **402**: 402–404.
- 658 **Thompson M V, Holbrook NM. 2003.** Application of a single-solute non-steady-state phloem  
659 model to the study of long-distance assimilate transport. *Journal of Theoretical Biology* **220**:  
660 419–455.
- 661 **Turgeon R. 1996.** Phloem loading and plasmodesmata. *Trends in Plant Science* **1**: 418–423.
- 662 **Turgeon R. 2006.** Phloem loading: how leaves gain their independence. *BioScience* **56**: 15–24.
- 663 **Turgeon R. 2010.** The puzzle of phloem pressure. *Plant Physiology* **154**: 578–581.
- 664 **Turgeon R, Medville R. 2011.** *Amborella trichopoda*, plasmodesmata, and the evolution of  
665 phloem loading. *Protoplasma* **248**: 173–180.
- 666 **Upchurch G, Dilcher D, Crepet W. 1984.** Cuticle evolution in Early Cretaceous angiosperms  
667 from the Potomac Group of Virginia and Maryland. *Annals of the Missouri Botanical Garden*  
668 **71**: 522–550.
- 669 **van Bel AJ, Gamalei YV, Ammerlaan A, Bik LP. 1992.** Dissimilar phloem loading in leaves  
670 with symplasmic or apoplasmic minor-vein configurations. *Planta* **186**: 518–525.



671 **Woodruff DR, Bond BJ, Meinzer FC. 2004.** Does turgor limit growth in tall trees? *Plant, Cell*  
672 *& Environment* **27**: 229–236.

673 **Zhang C, Han L, Slewinski TL, Thomas L, Sun J, Zhang J, Wang ZY, Turgeon R. 2014.**  
674 Symplastic phloem loading in poplar. *Plant Physiology* **166**: 306–13.

675 **Zwieniecki MA, Boyce CK. 2014.** Evolution of a unique anatomical precision in angiosperm  
676 leaf venation lifts constraints on vascular plant ecology. *Proceedings of the Royal Society B-*  
677 *Biological Sciences* **281**: 20132829.

678 **Zwieniecki MA, Melcher PJ, Feild TS, Holbrook NM. 2004.** A potential role for xylem–  
679 phloem interactions in the hydraulic architecture of trees: effects of phloem girdling on xylem  
680 hydraulic conductance. *Tree Physiology* **24**: 911–917.

681

682 **Supporting information Figures S1 and S2:** Vascular tissues in the major veins of mature  
683 leaves and seedlings in *Illicium parviflorum*.

684

## 685 **FIGURE LEGENDS**

686 **Fig. 1. *Illicium parviflorum* shrubs in the greenhouse.** Arrows indicate the diameter of the  
687 stem where samples were obtained. Distal parts correspond with thinner stems and areas of  
688 primary growth. Inset shows an image of an uprooted seedling. Scale in cm.

689 **Fig. 2. Anatomy of the stems in *Illicium parviflorum*.** (a) Stem with primary growth, 2mm  
690 diameter. (b) Stem with secondary growth, 4mm diameter. (c) Barky stem, 6mm diameter. (d)  
691 Percentage of cross-sectional areas occupied by the cortex (grey), phloem (yellow), xylem  
692 (orange), and pith (green) tissues at different developmental stages of the stems based on their  
693 diameter. (e) Sieve tube element number per stem cross-sectional area: blue color represents the  
694 relationship between the total number of sieve tube elements and stem diameter; yellow dots  
695 represent the percentage of sieve tubes (conductive area) with respect to the total number of cells  
696 per phloem cluster (the areas of the phloem separated by ray parenchyma). (a-c), 50µm cross  
697 sections stained with aniline blue for callose. Bars: 500µm.

698 **Fig. 3. The phloem in the stems of *Illicium parviflorum*.** (a) Sieve tube element in a stem with  
699 primary growth (2mm diameter) showing cell walls in cyan and sieve plates in red. (b) Sieve  
700 tube elements in the 4mm diameter stem. (c) Sieve tube element network in the 6mm diameter  
701 stem. (d) Geometrical relationships between sieve tube element length (light blue), radius (red)  
702 and diameter of the stem. (e) Relationship between number of sieve areas per end plate (dark  
703 blue) and their size (green) across stem diameters. (a-c), longitudinal sections of the stems  
704 stained with aniline blue for callose and calcofluor white for cellulose. Logarithmic regression  
705 curves at a  $p < 0.05$ , and bars display standard error (SE). Bars: (a), 100 $\mu\text{m}$ ; (b), 200  $\mu\text{m}$ ; (c),  
706 500 $\mu\text{m}$ .

707 **Fig. 4. Anatomy of the leaves of *Illicium parviflorum*.** (a) Mature leaf showing the adaxial  
708 surface and the reticulate venation. (b) Vasculature of the petiole, showing the arrangement of  
709 xylem (Xy), and phloem (Phl) in clusters separated by rows of ray parenchyma. (c) Cross section  
710 of the midrib showing a similar organization but surrounded by a sheath of sclereid tissue (white  
711 arrows). (d) Secondary vein showing reduced xylem and phloem tissue compared with the  
712 primary vein. (e) Leaf of a seedling. (f) Petiole showing a differentiating xylem (yellow), several  
713 rows of cambial cells (white), and differentiating phloem (blue) tissues. (g) Similar organization  
714 in the midrib. (h) Secondary vein. (b-d), (f-h): Cross sections of the stained with aniline and  
715 calcofluor white. Xy, xylem; phl, phloem; ca; cambium. Bars: 500 $\mu\text{m}$ .

716 **Fig. 5. The phloem in the leaves of *Illicium parviflorum*.** (a) Scaling relationship between sieve  
717 tube element length (blue) and radius (red), across major veins in mature leaves of *I.*  
718 *parviflorum*. (b) Longitudinal section of the sieve tube elements of the secondary vein of a  
719 mature leaf showing the sieve plate connections (arrowheads). (c) Sieve tube element of a fourth  
720 order vein in a mature leaf showing sieve plates all along the lateral walls. (d) Relationship  
721 between sieve tube element length (blue) and radius (red) in the major veins of seedlings. (e)  
722 Longitudinal section of the secondary vein of a leaf from seedlings, with the sieve plate  
723 connection (arrowheads) between contiguous tubes. (a,d) bars display standard error (SE); (b,c,e)  
724 bars: 500 $\mu\text{m}$ .

725 **Fig. 6. Photosynthetic activity in *Illicium parviflorum*.** Comparison between the assimilation  
726 rates of adult plants (blue) and seedlings (red) under the same greenhouse conditions at three

727 time points during the day. Error bars (SE) emphasize overlapping averages between both plant  
728 types.

729 **Fig. 7. Velocity of the sap within the phloem of *Illicium parviflorum*.** Time lapse images of a  
730 leaf from a seedling showing advancement of the carboxyfluorescein dye through the phloem.  
731 Scale bars: 1000 $\mu$ m.

732 **Fig. 8. Sieve tube hydraulic resistance in the aerial parts of *Illicium parviflorum*.** (a) Inverse  
733 relationship between the sieve element resistances per length at each stem diameter (related with  
734 the distance to the base of the stem). (b) Sieve tube lumen resistance in the major veins of the  
735 mature leaves of *Illicium parviflorum*.

736 **Supporting information Figure S1.** Cross-sectional area of the vascular tissues along three  
737 areas of the major veins of mature leaves in *Illicium parviflorum*: the petiole, the midrib and the  
738 tip of the mayor vein. Letters over bars (SE) show significant differences between the areas at  
739 each point using the Tukey test for analysis of variance at a  $p < 0.05$ .

740 **Supporting information Figure S2.** Linear correlations between the total number of phloem  
741 cells and cambial cells (black) per vascular cluster, as well as the number of phloem cells and  
742 xylem cells (grey) in either mature leaves (top) and seedlings (bottom).

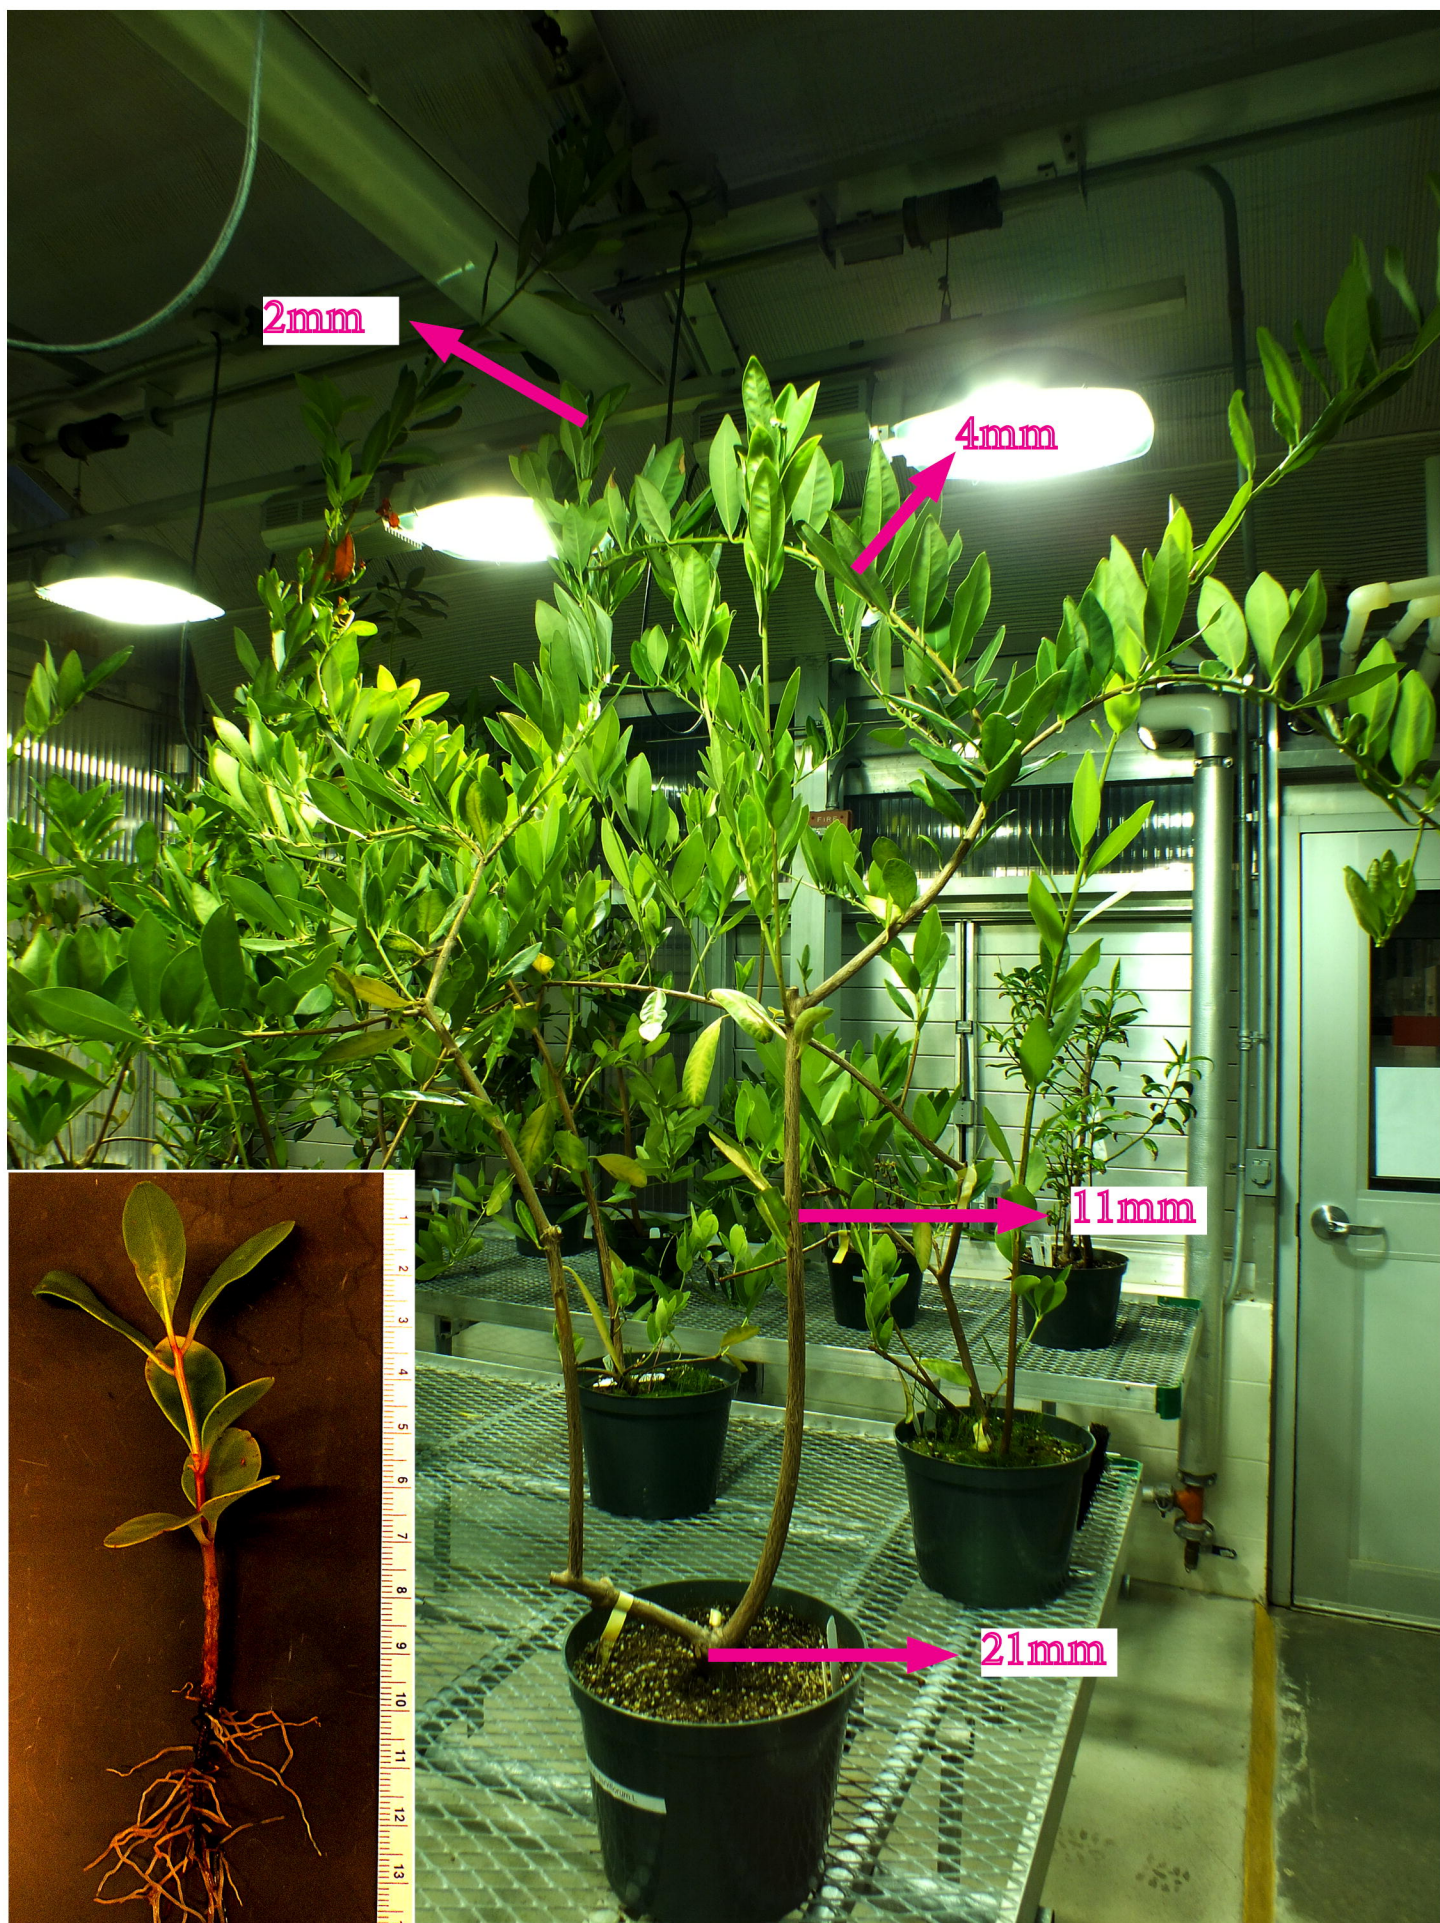

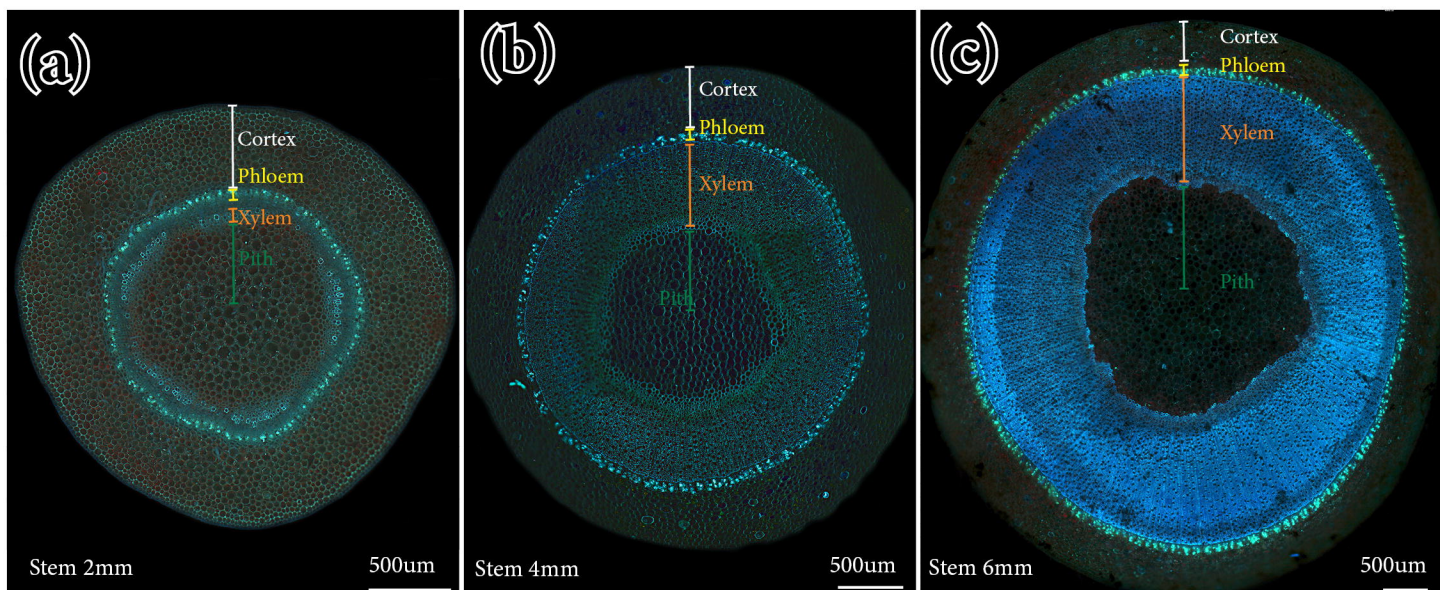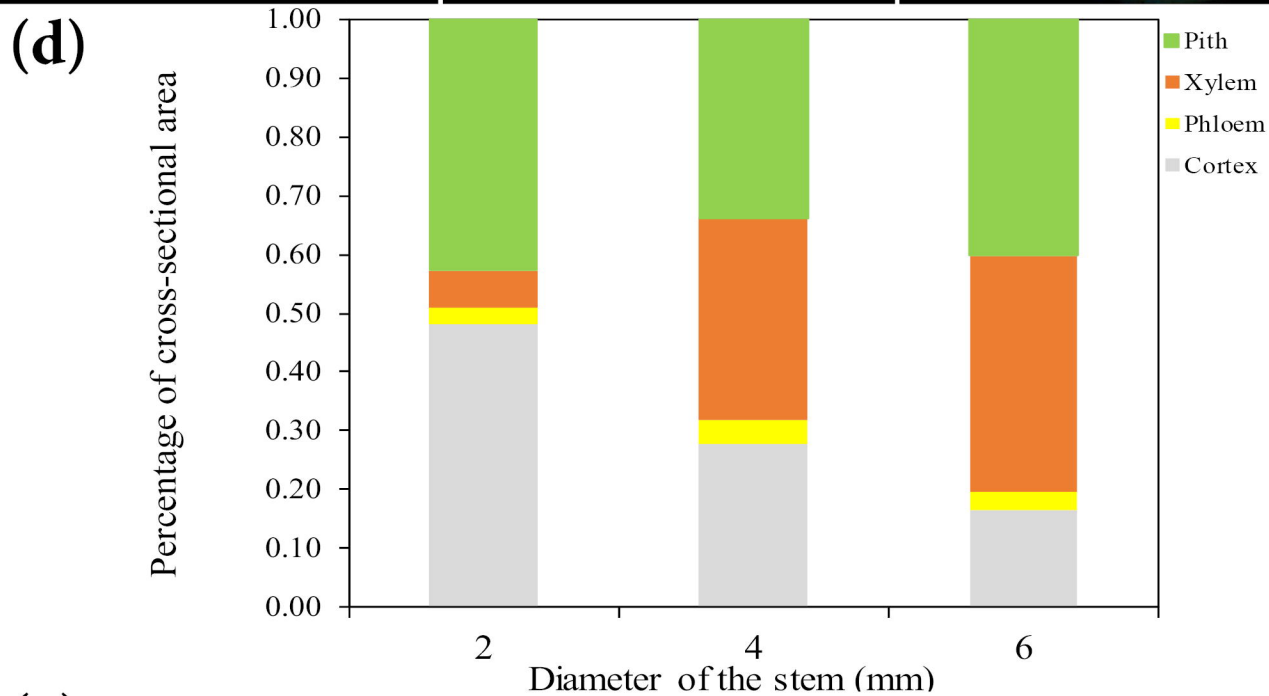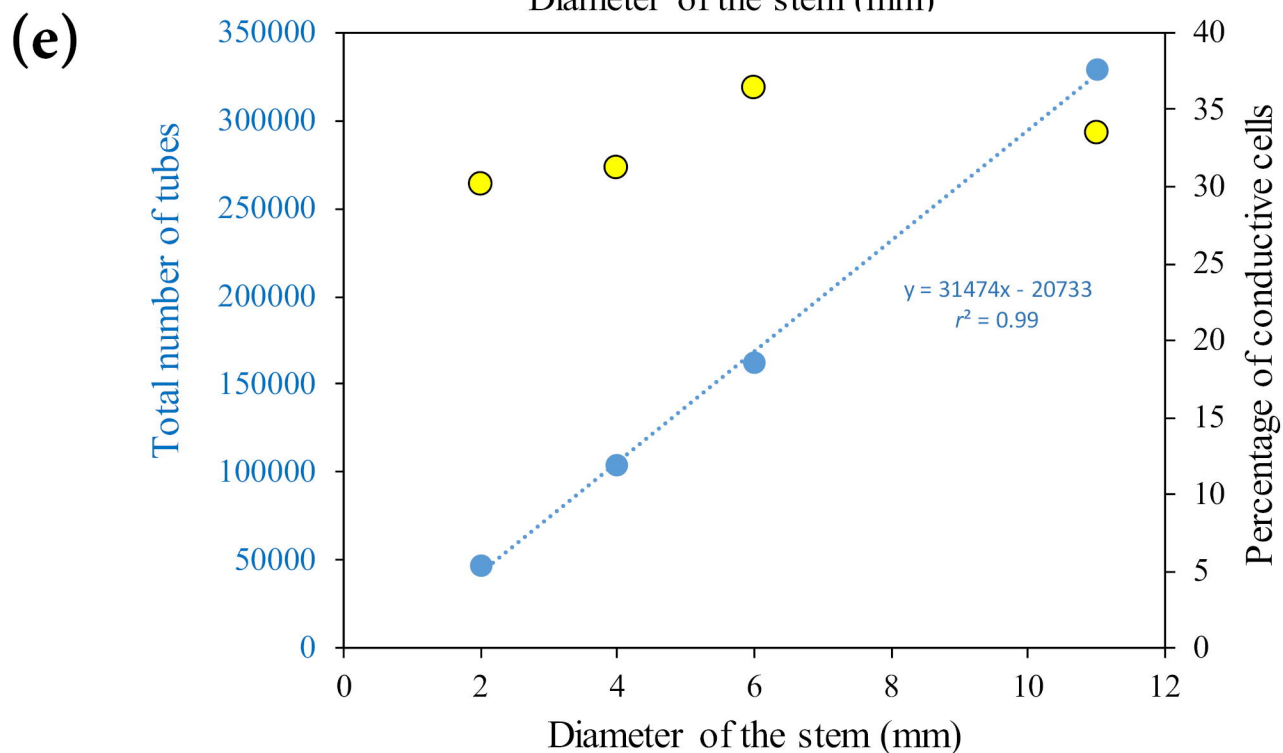

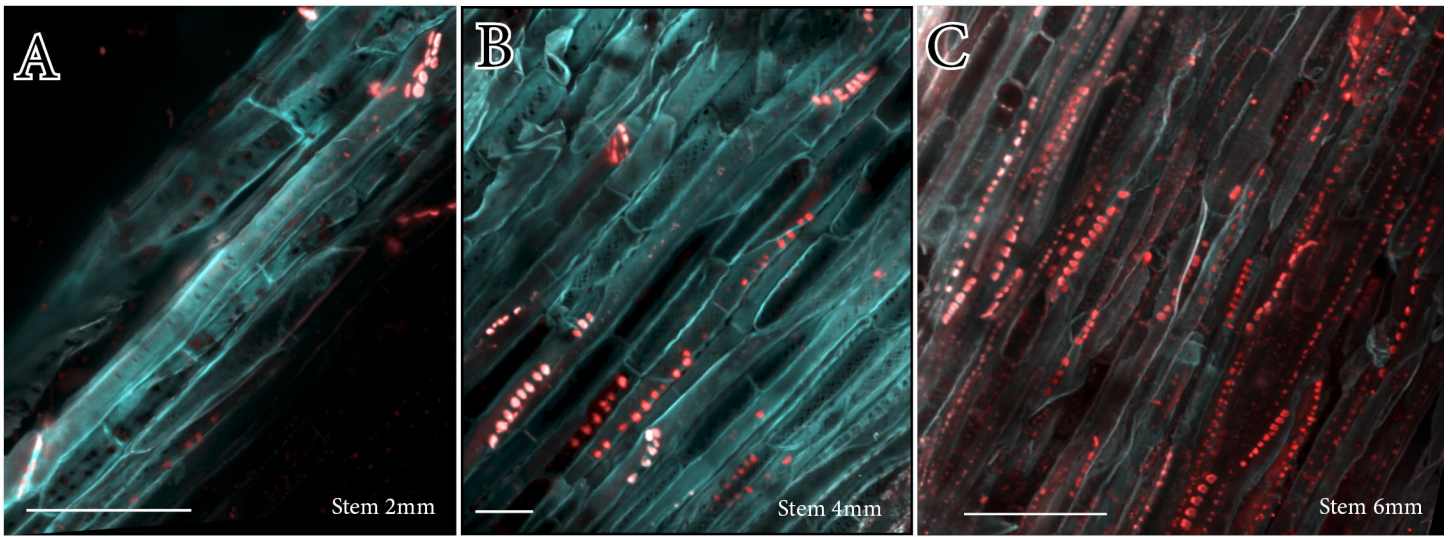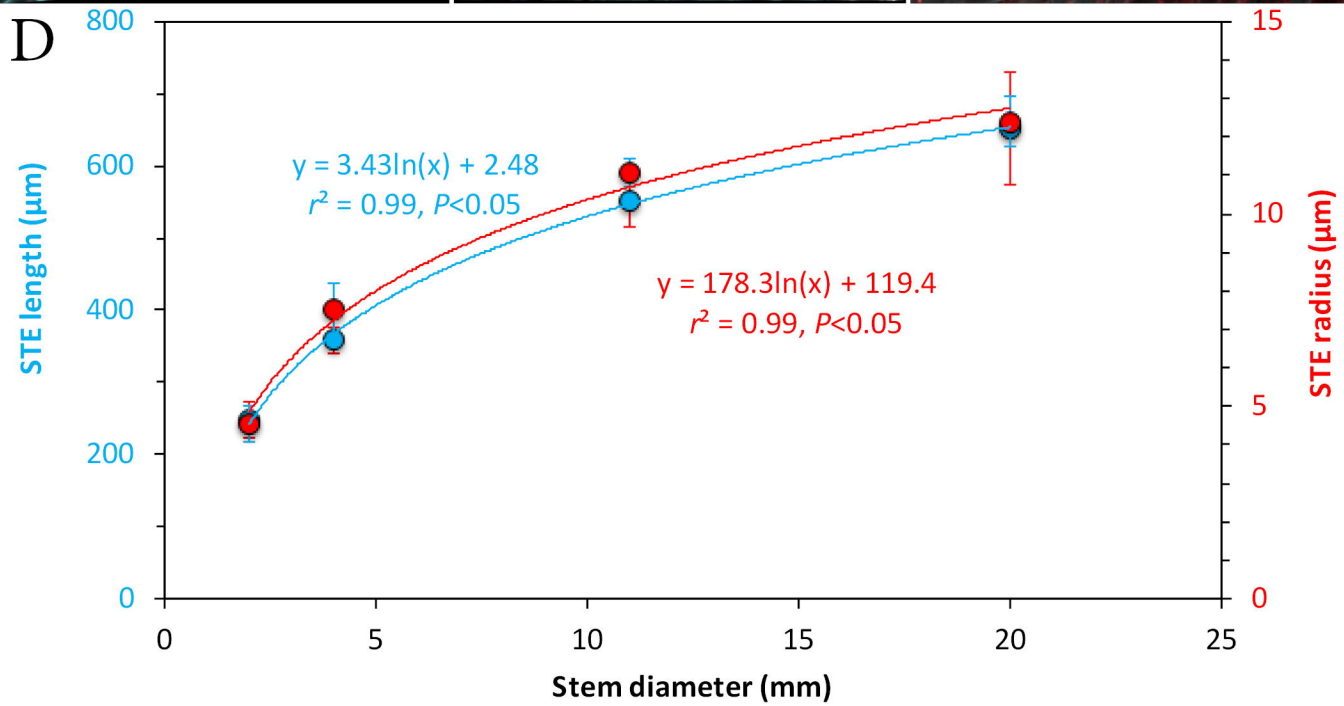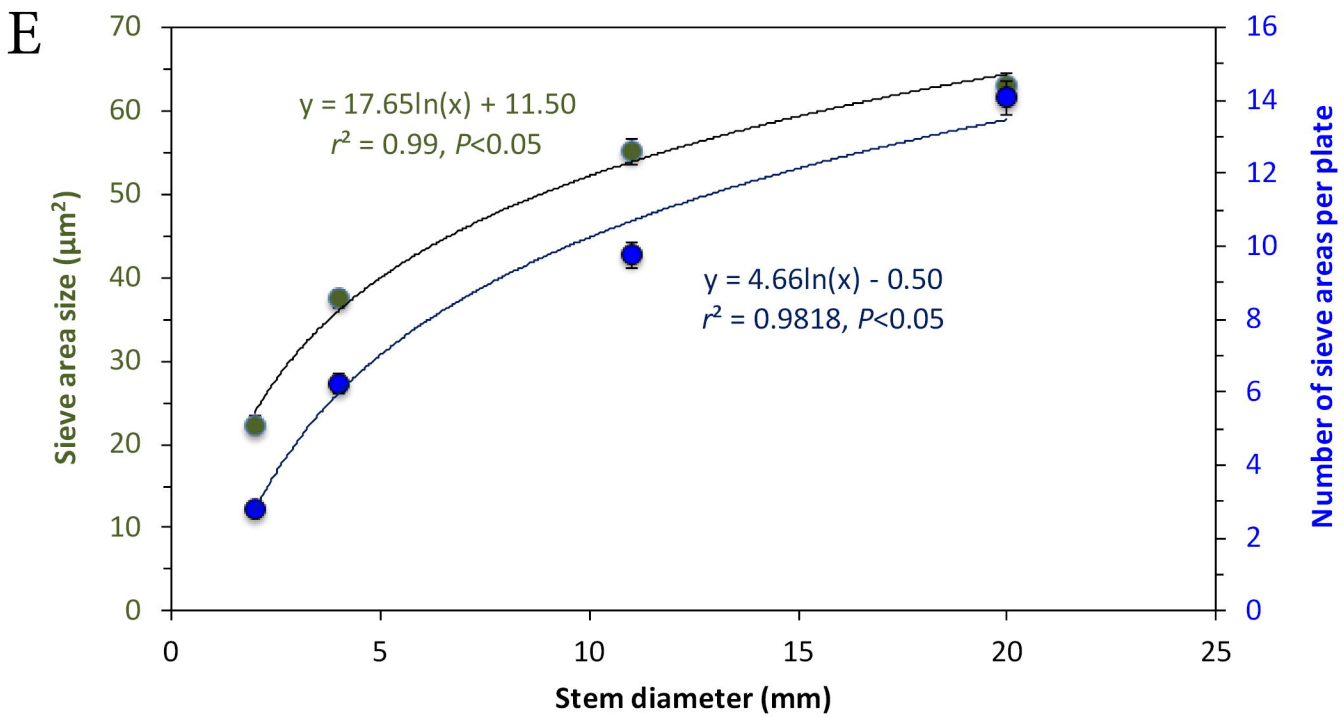

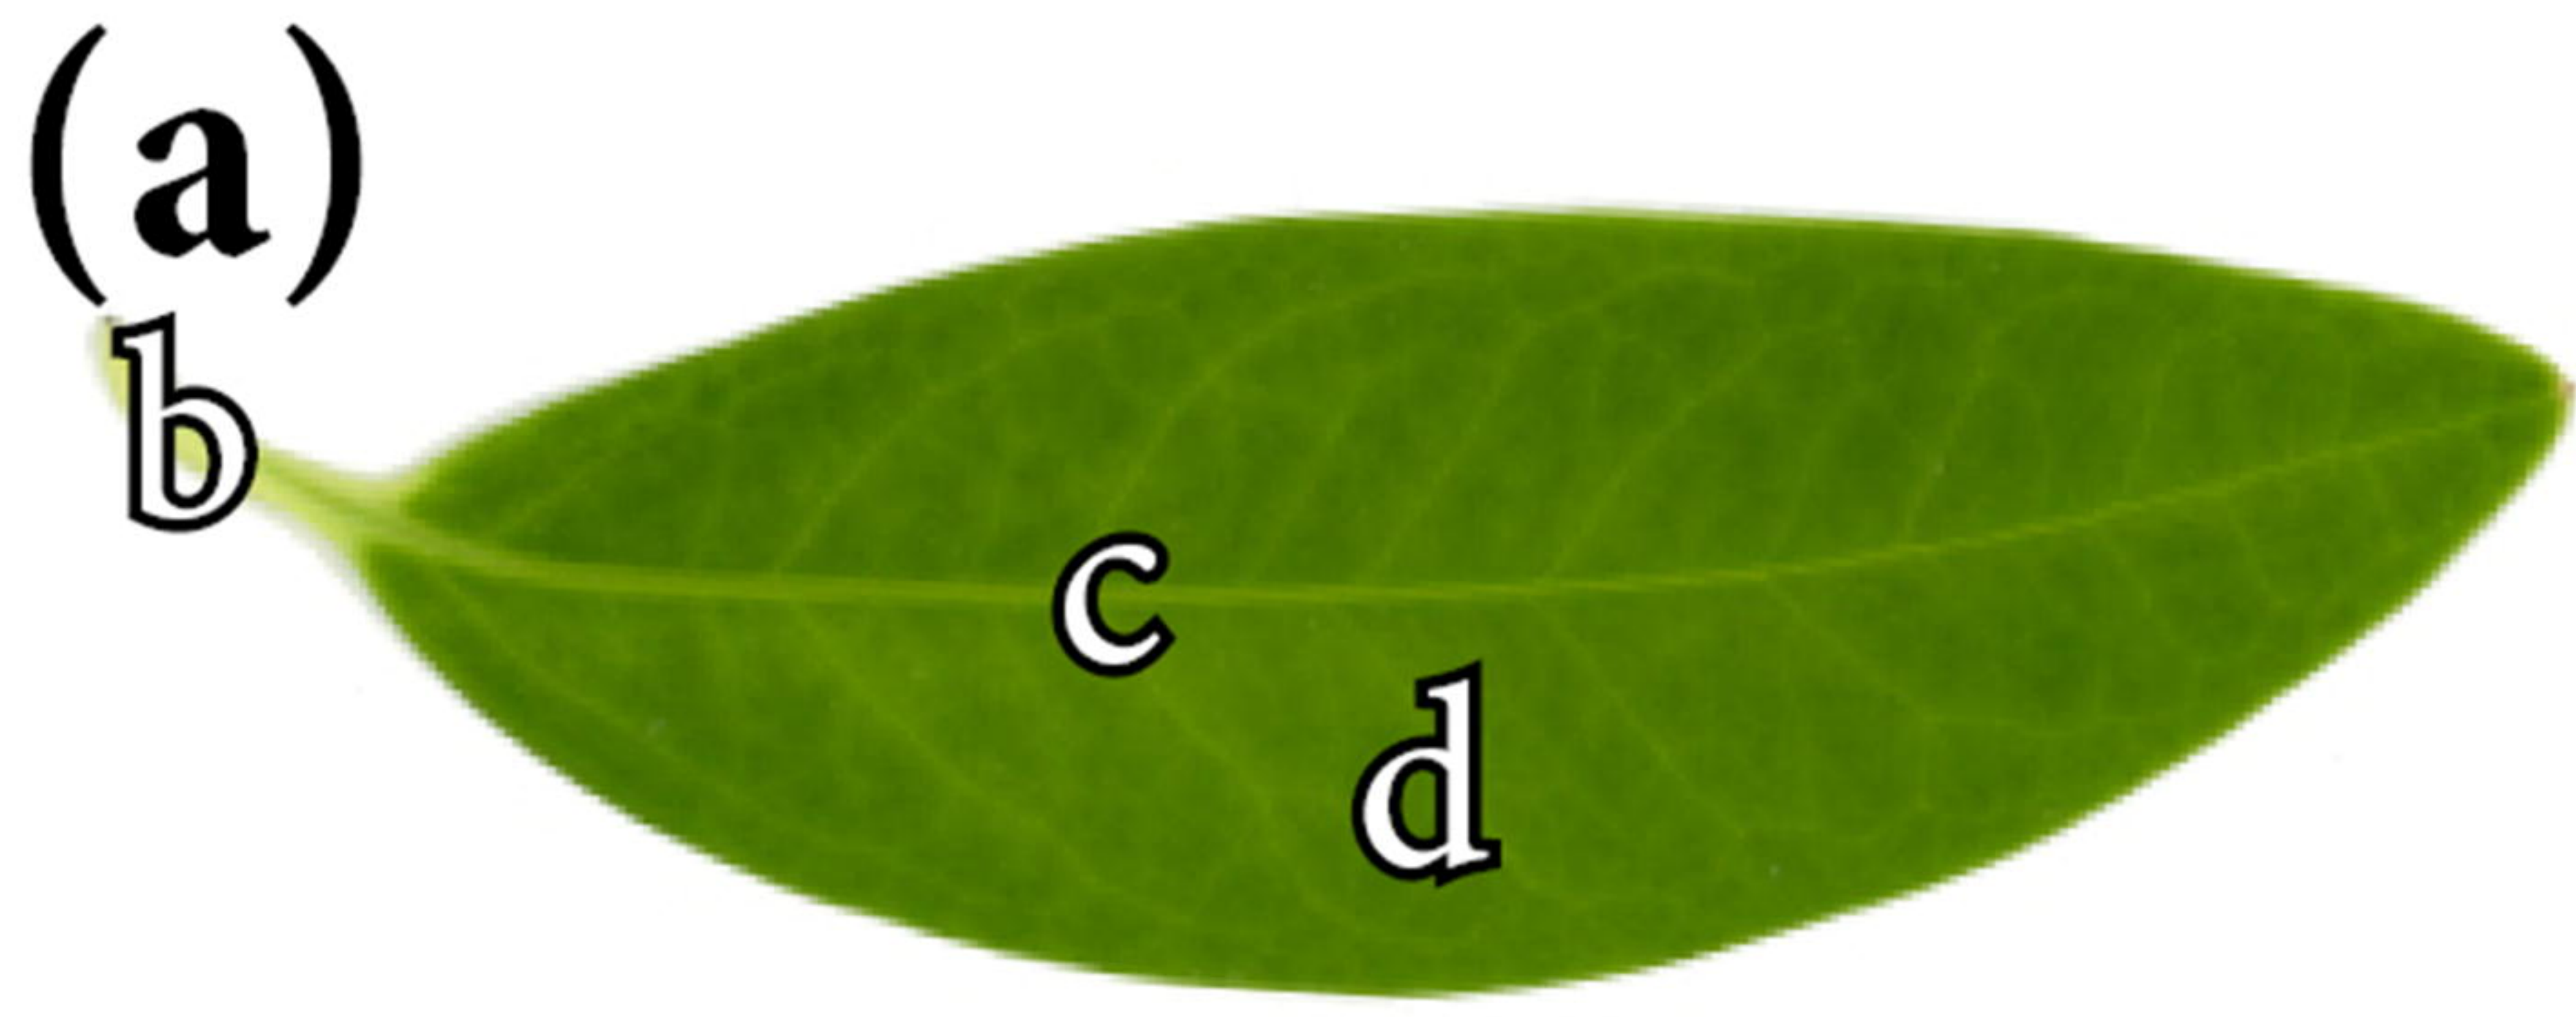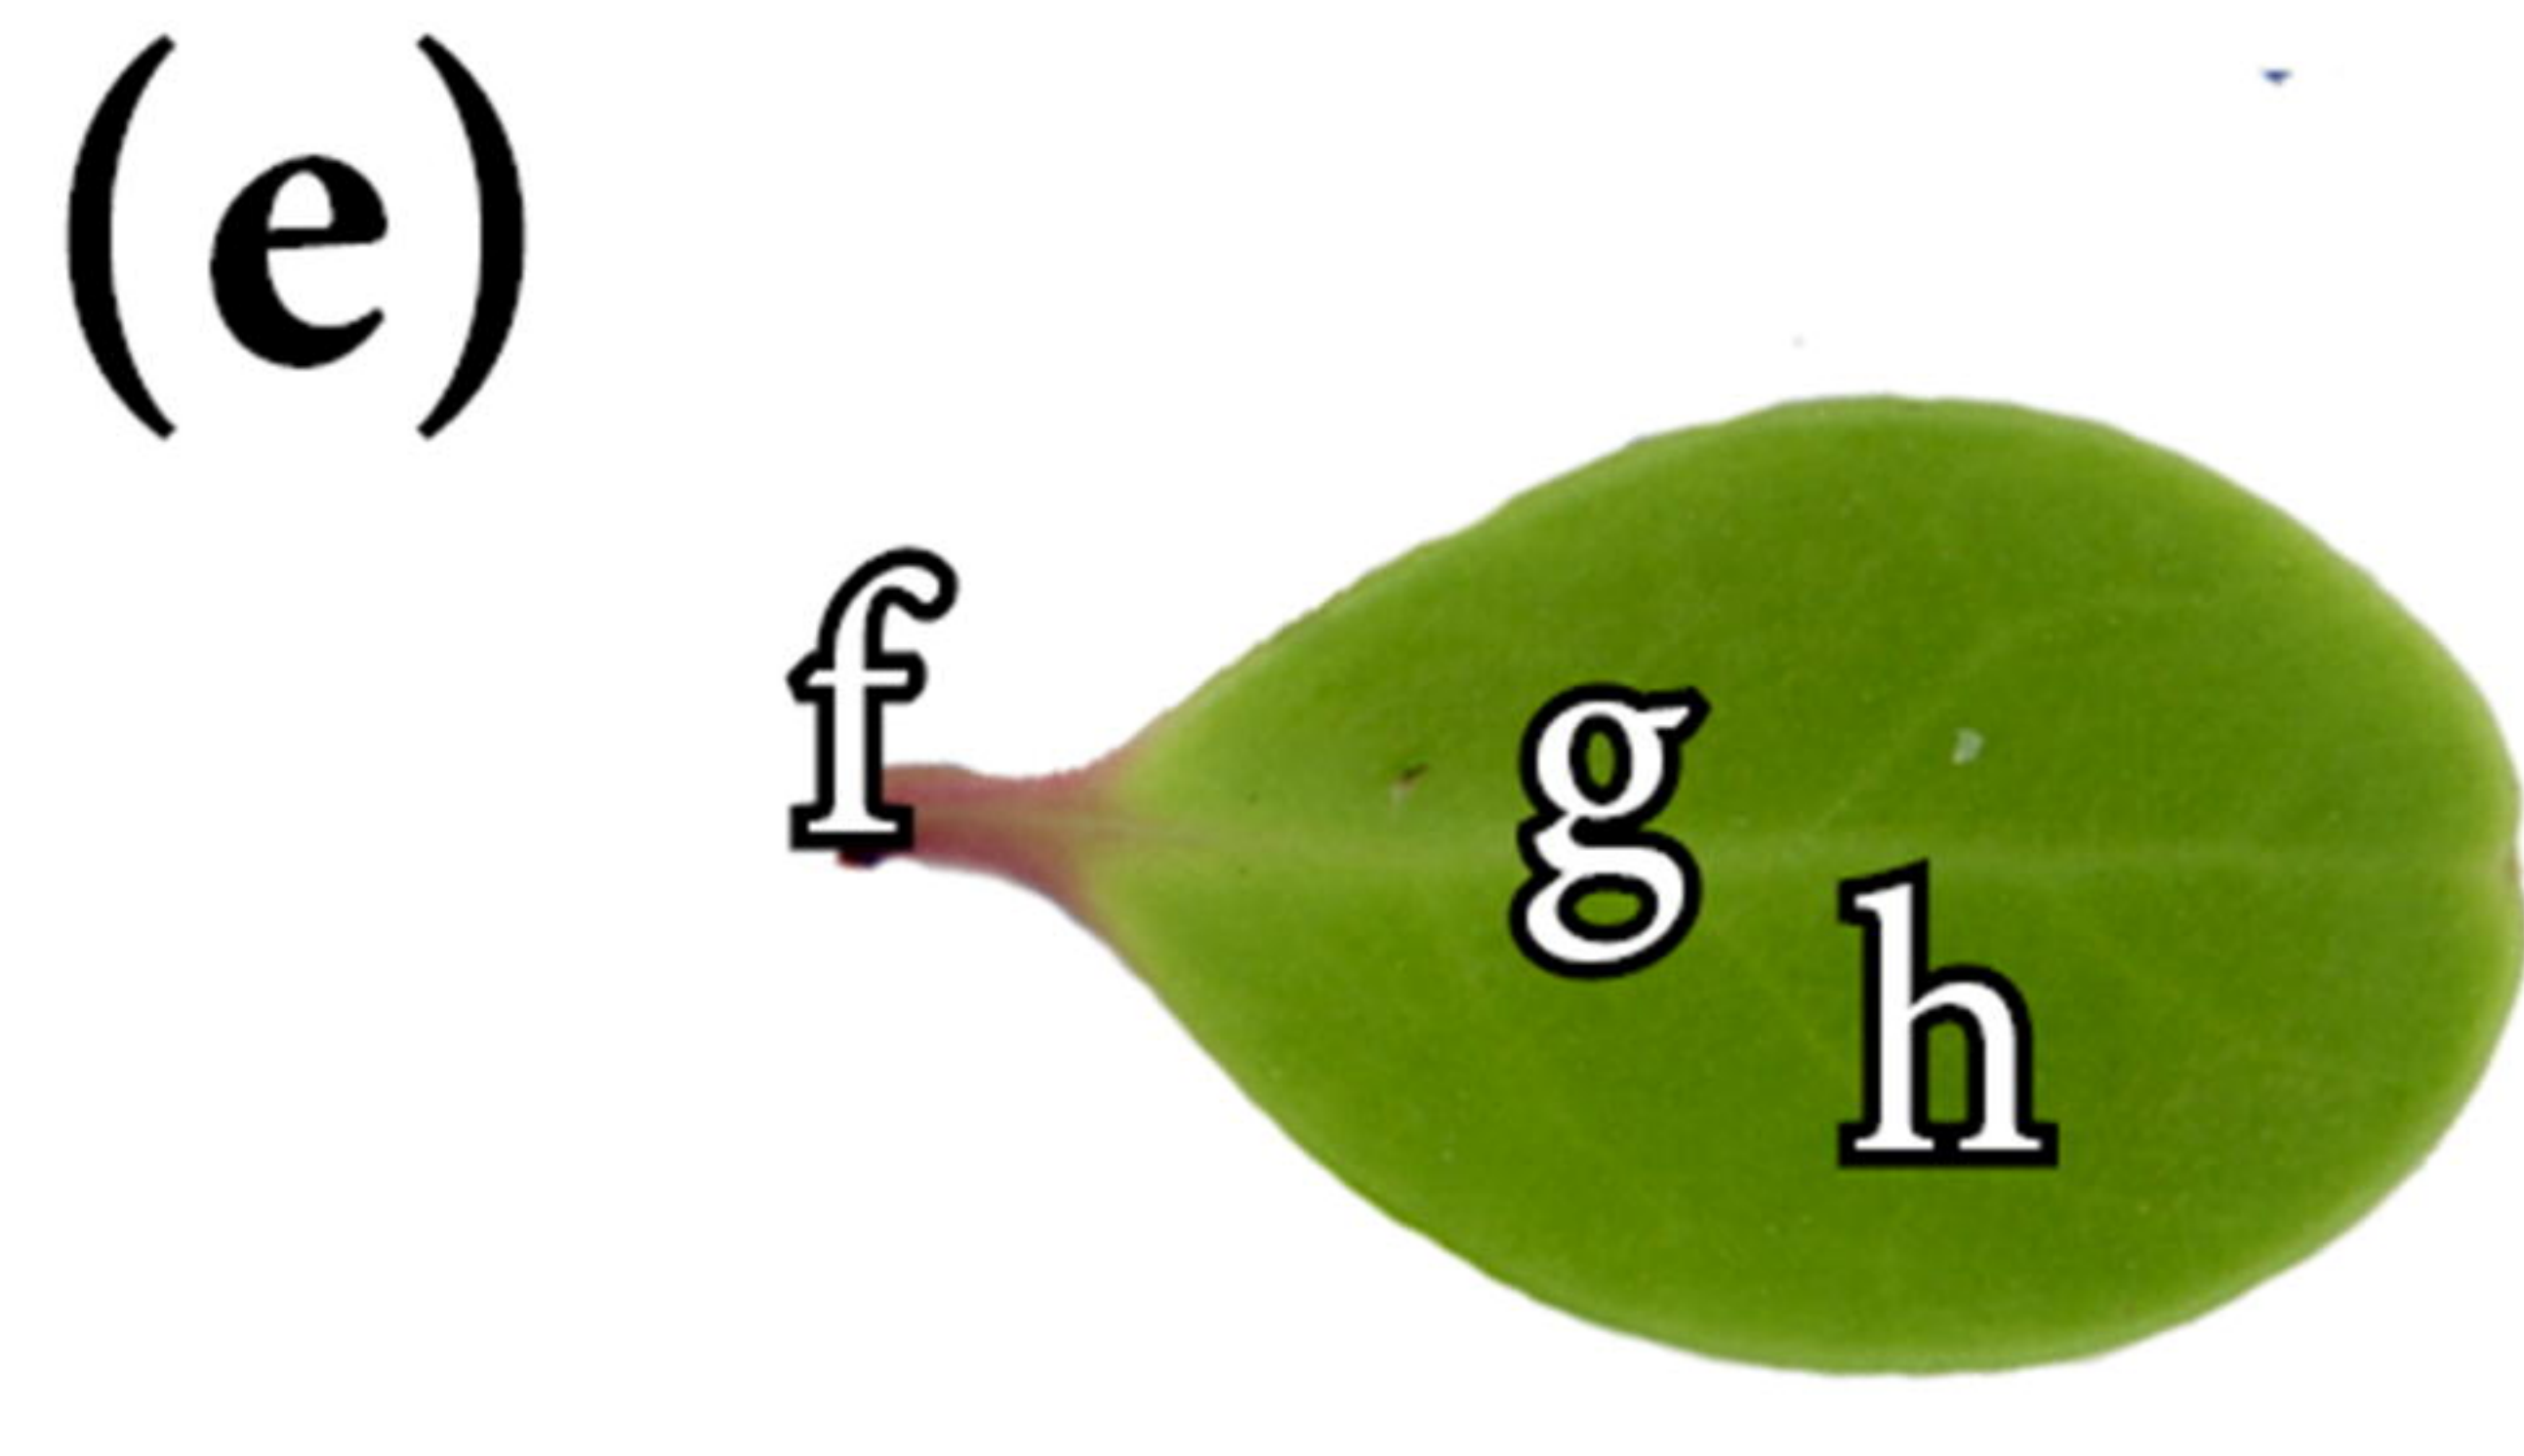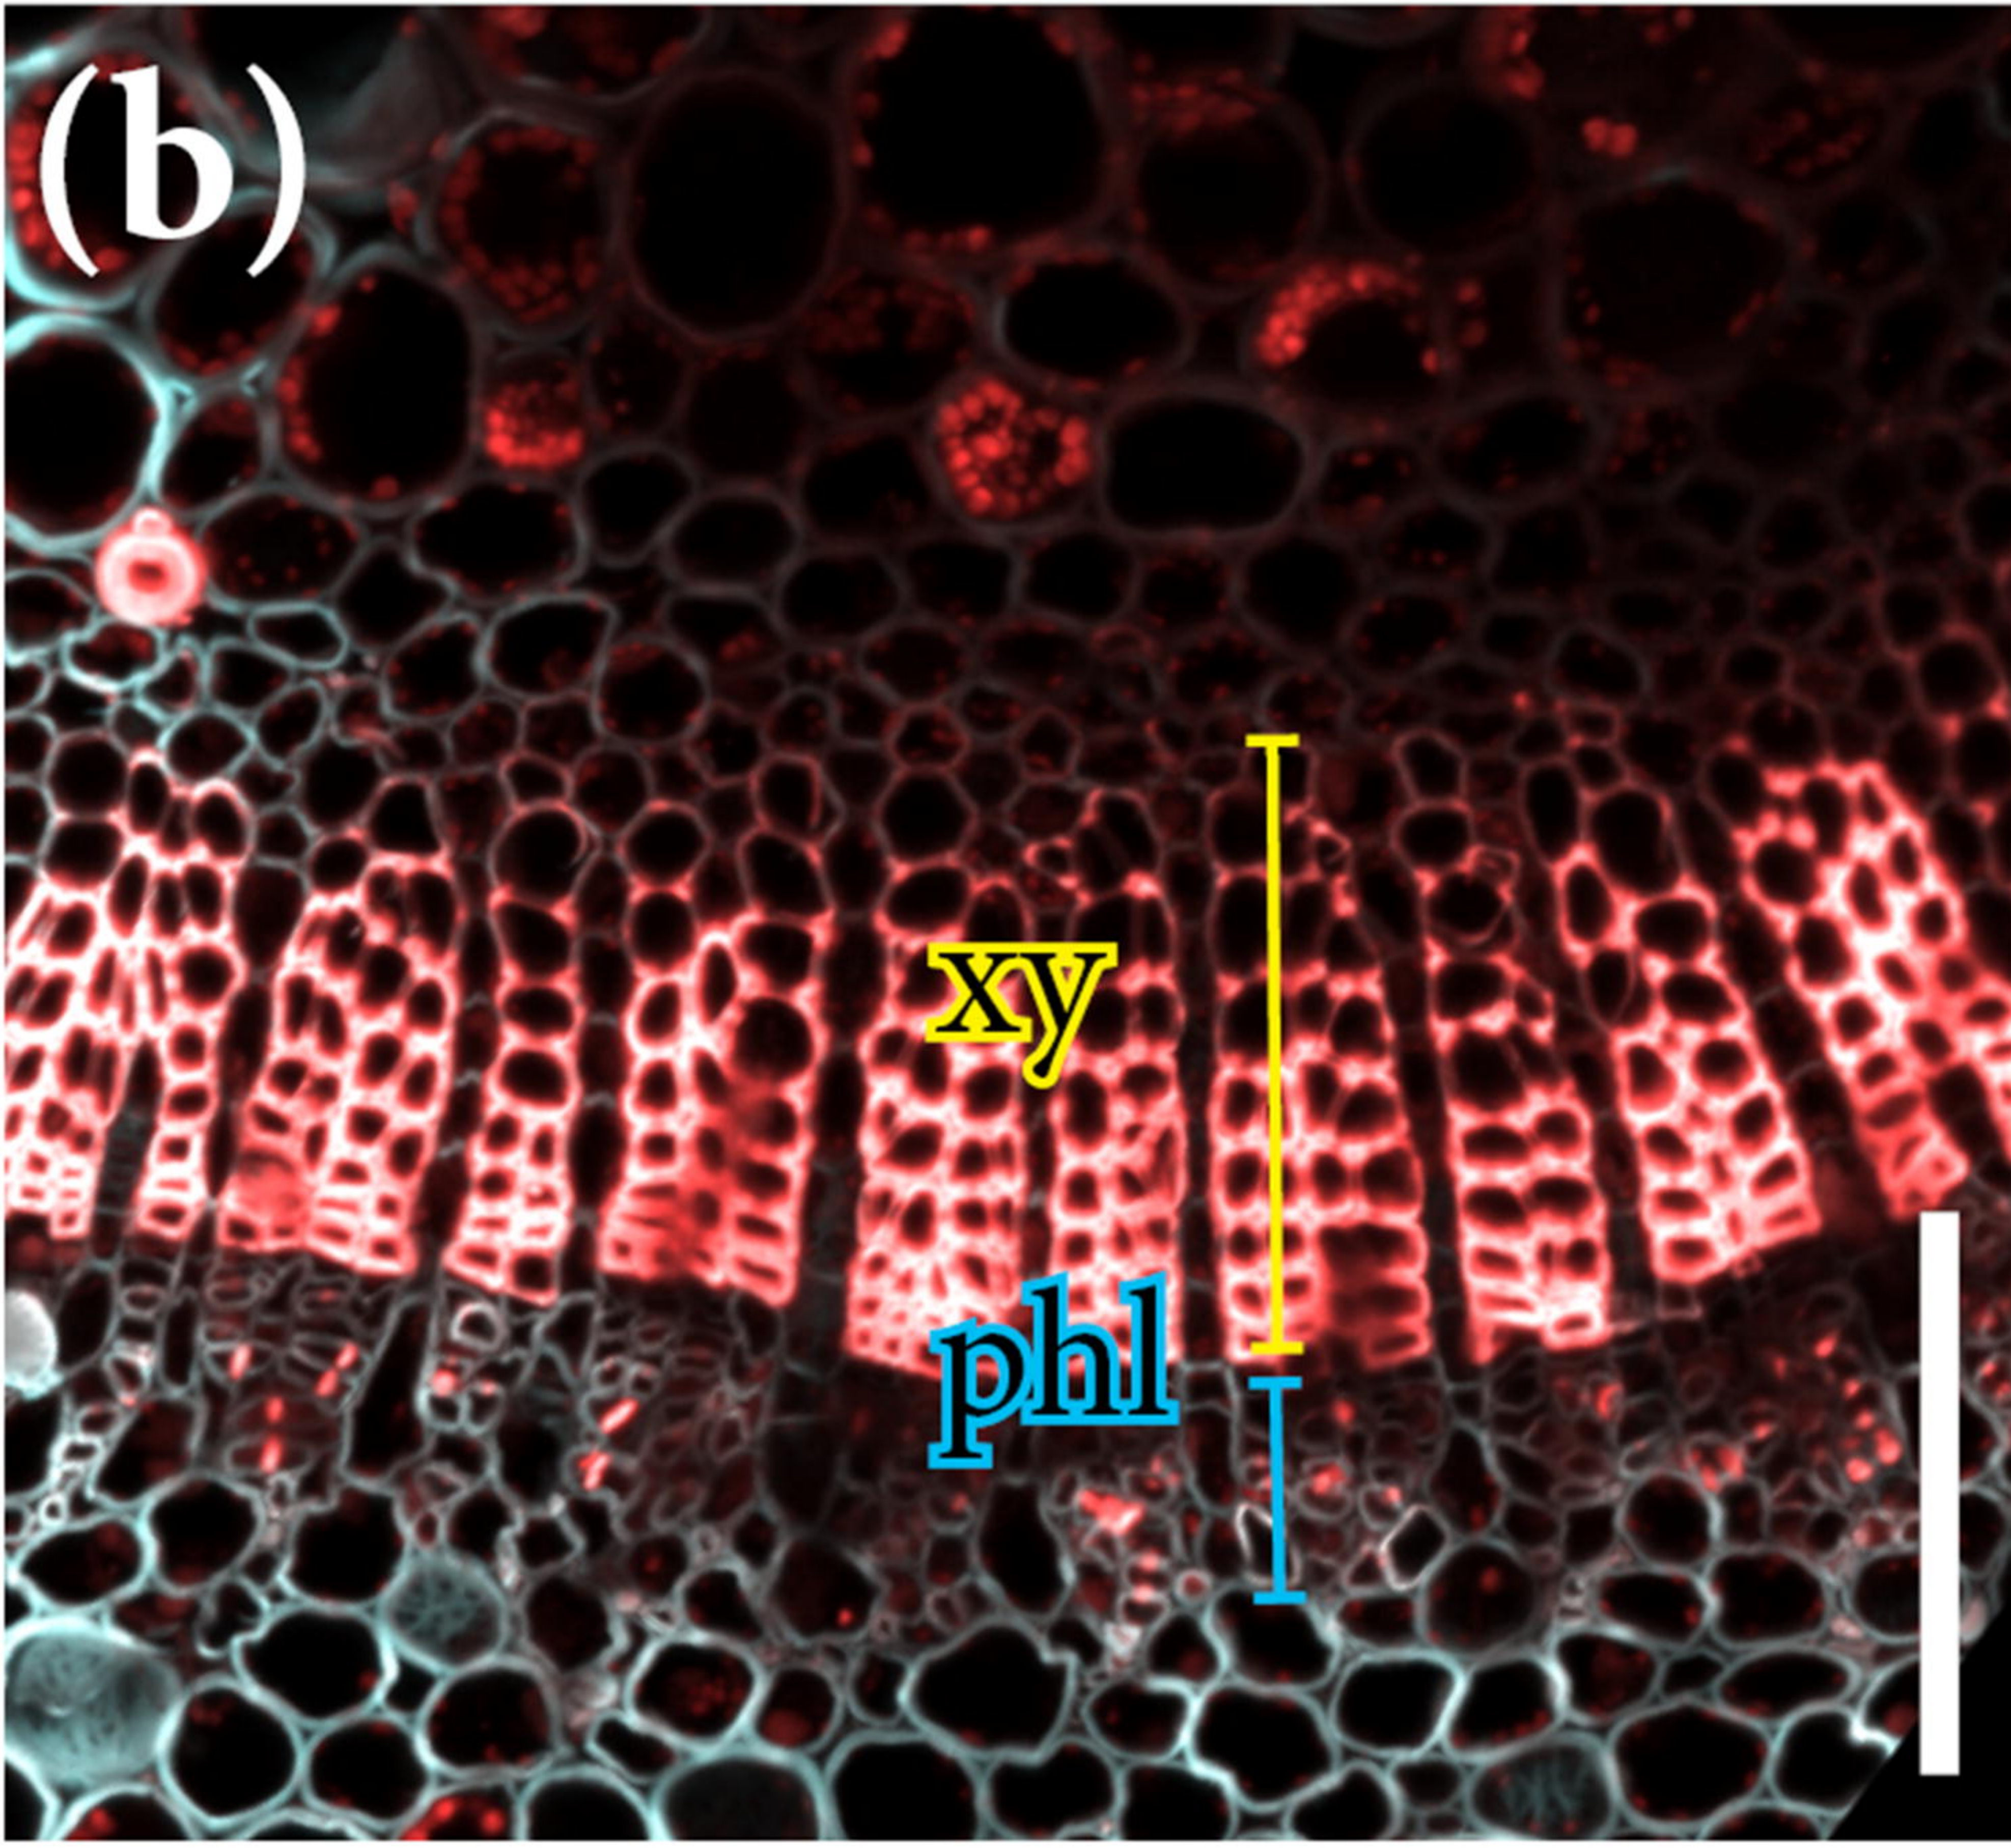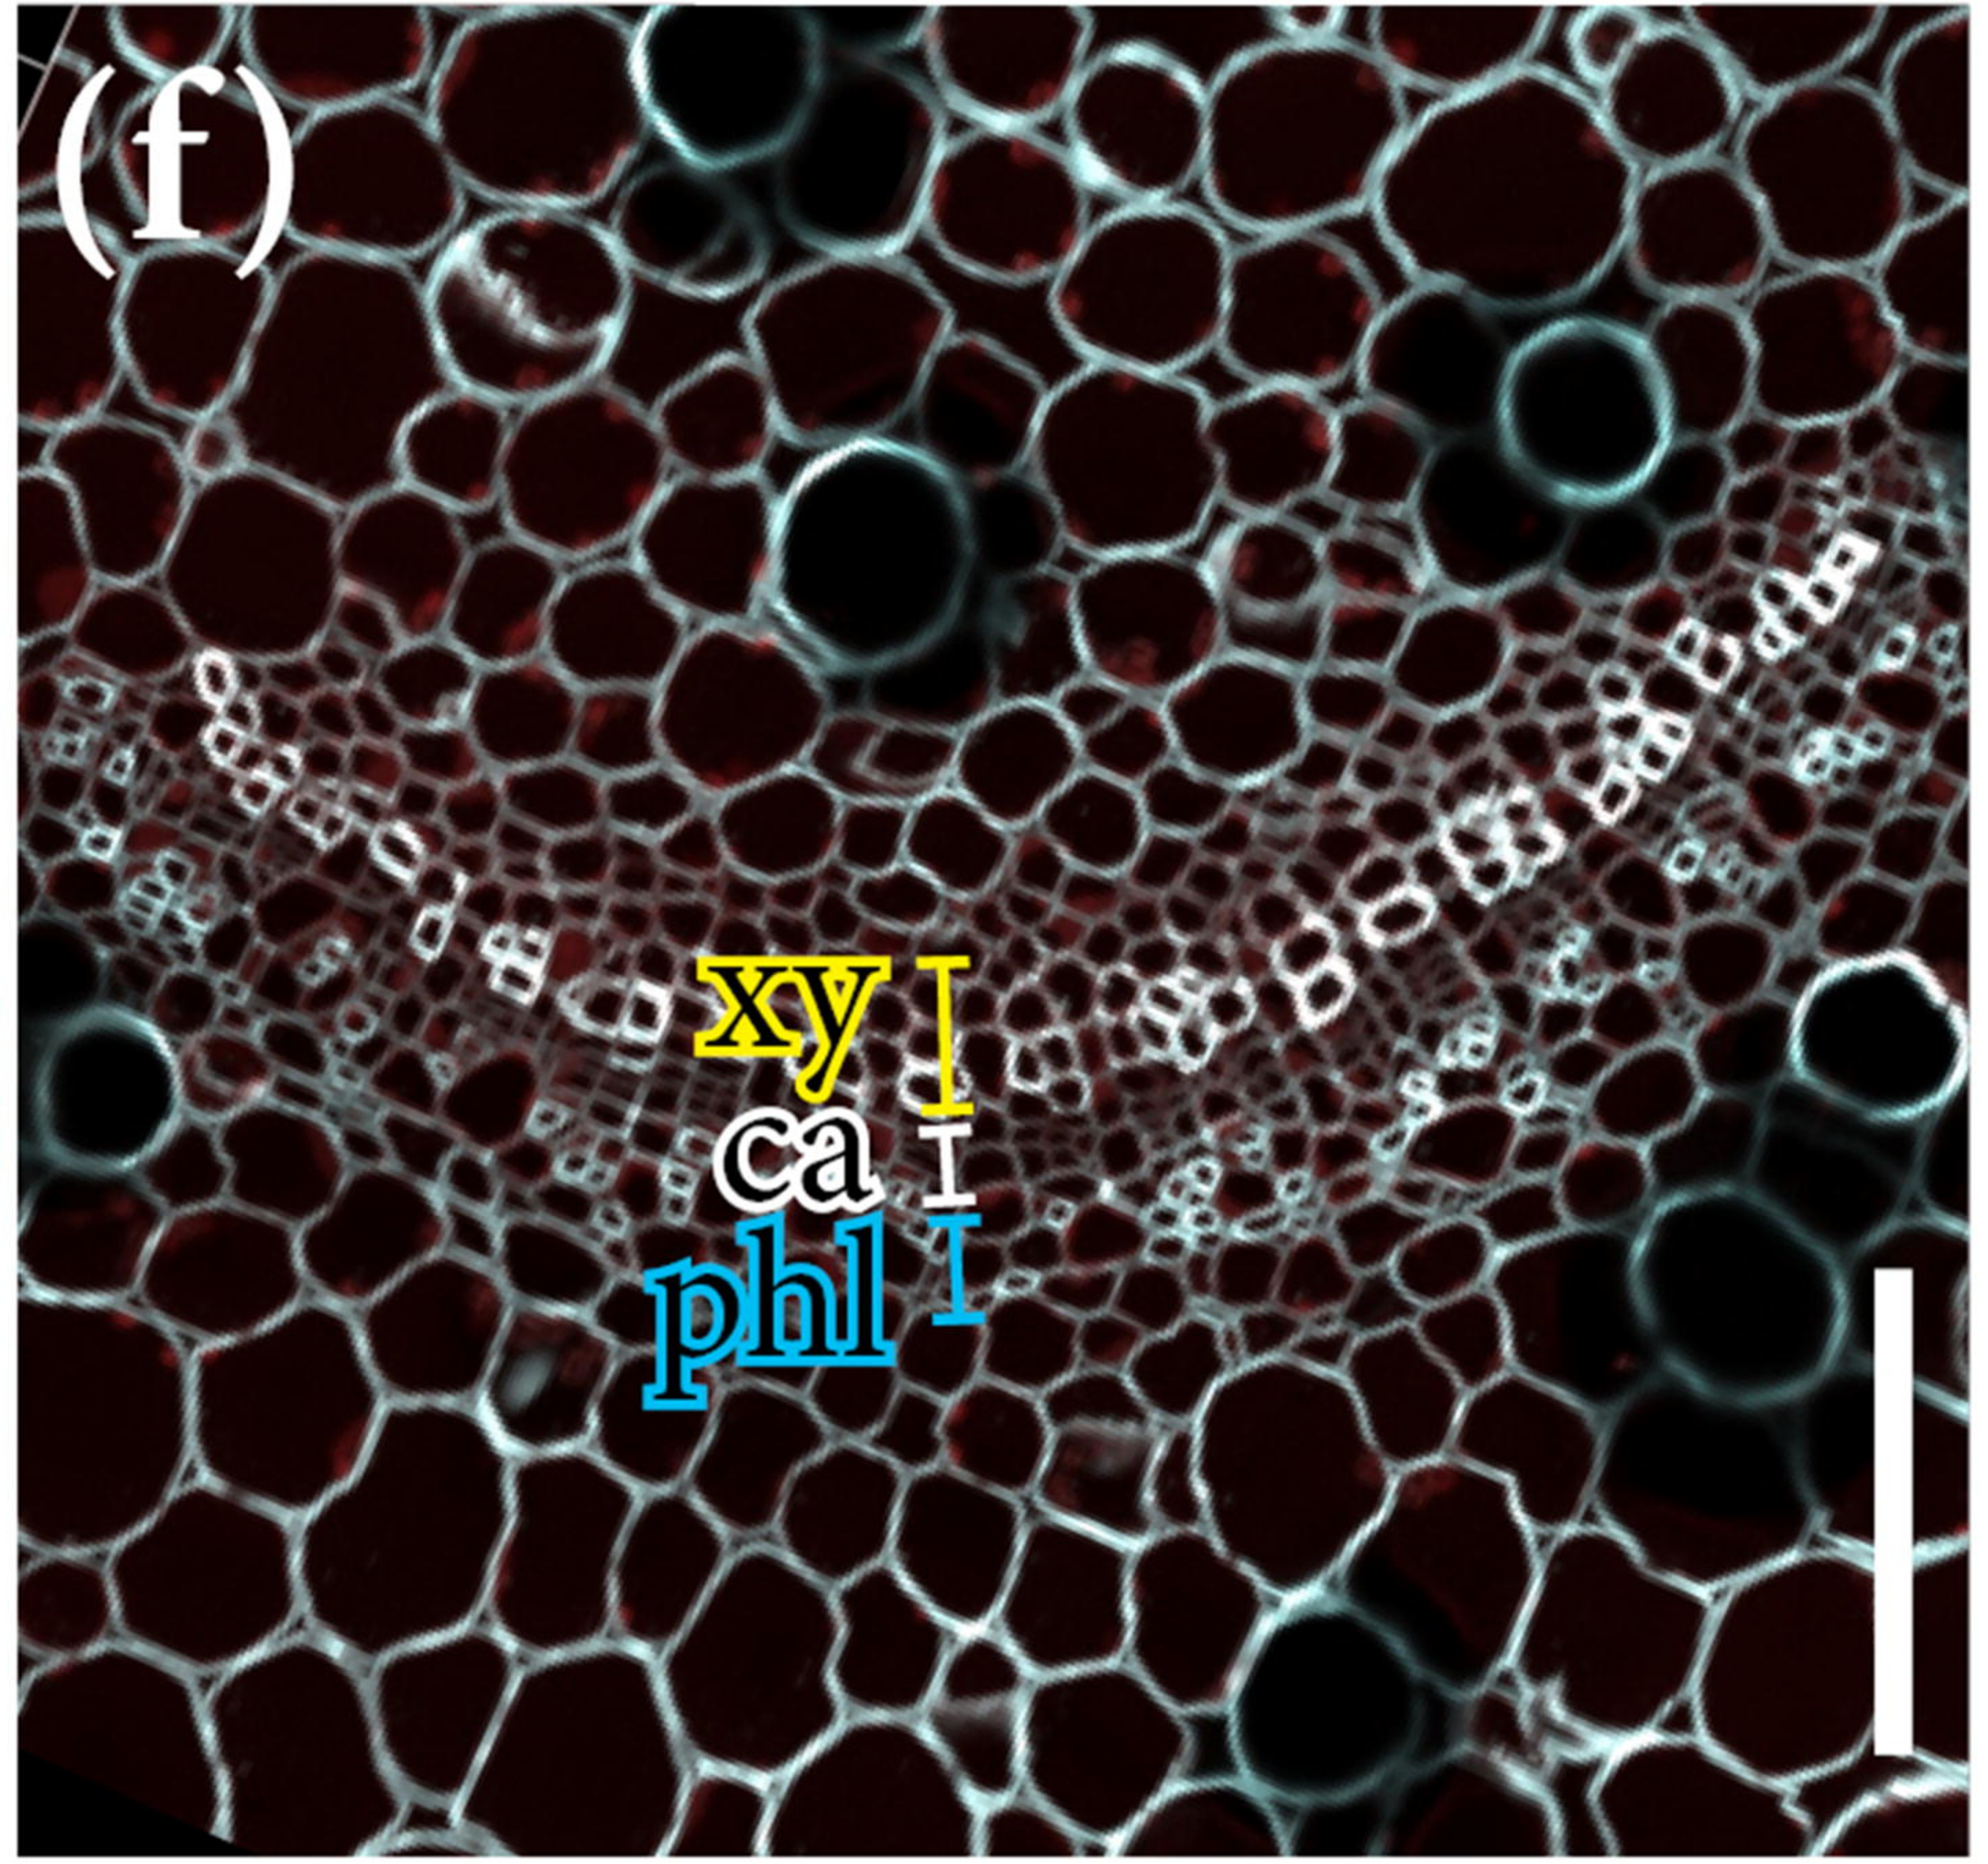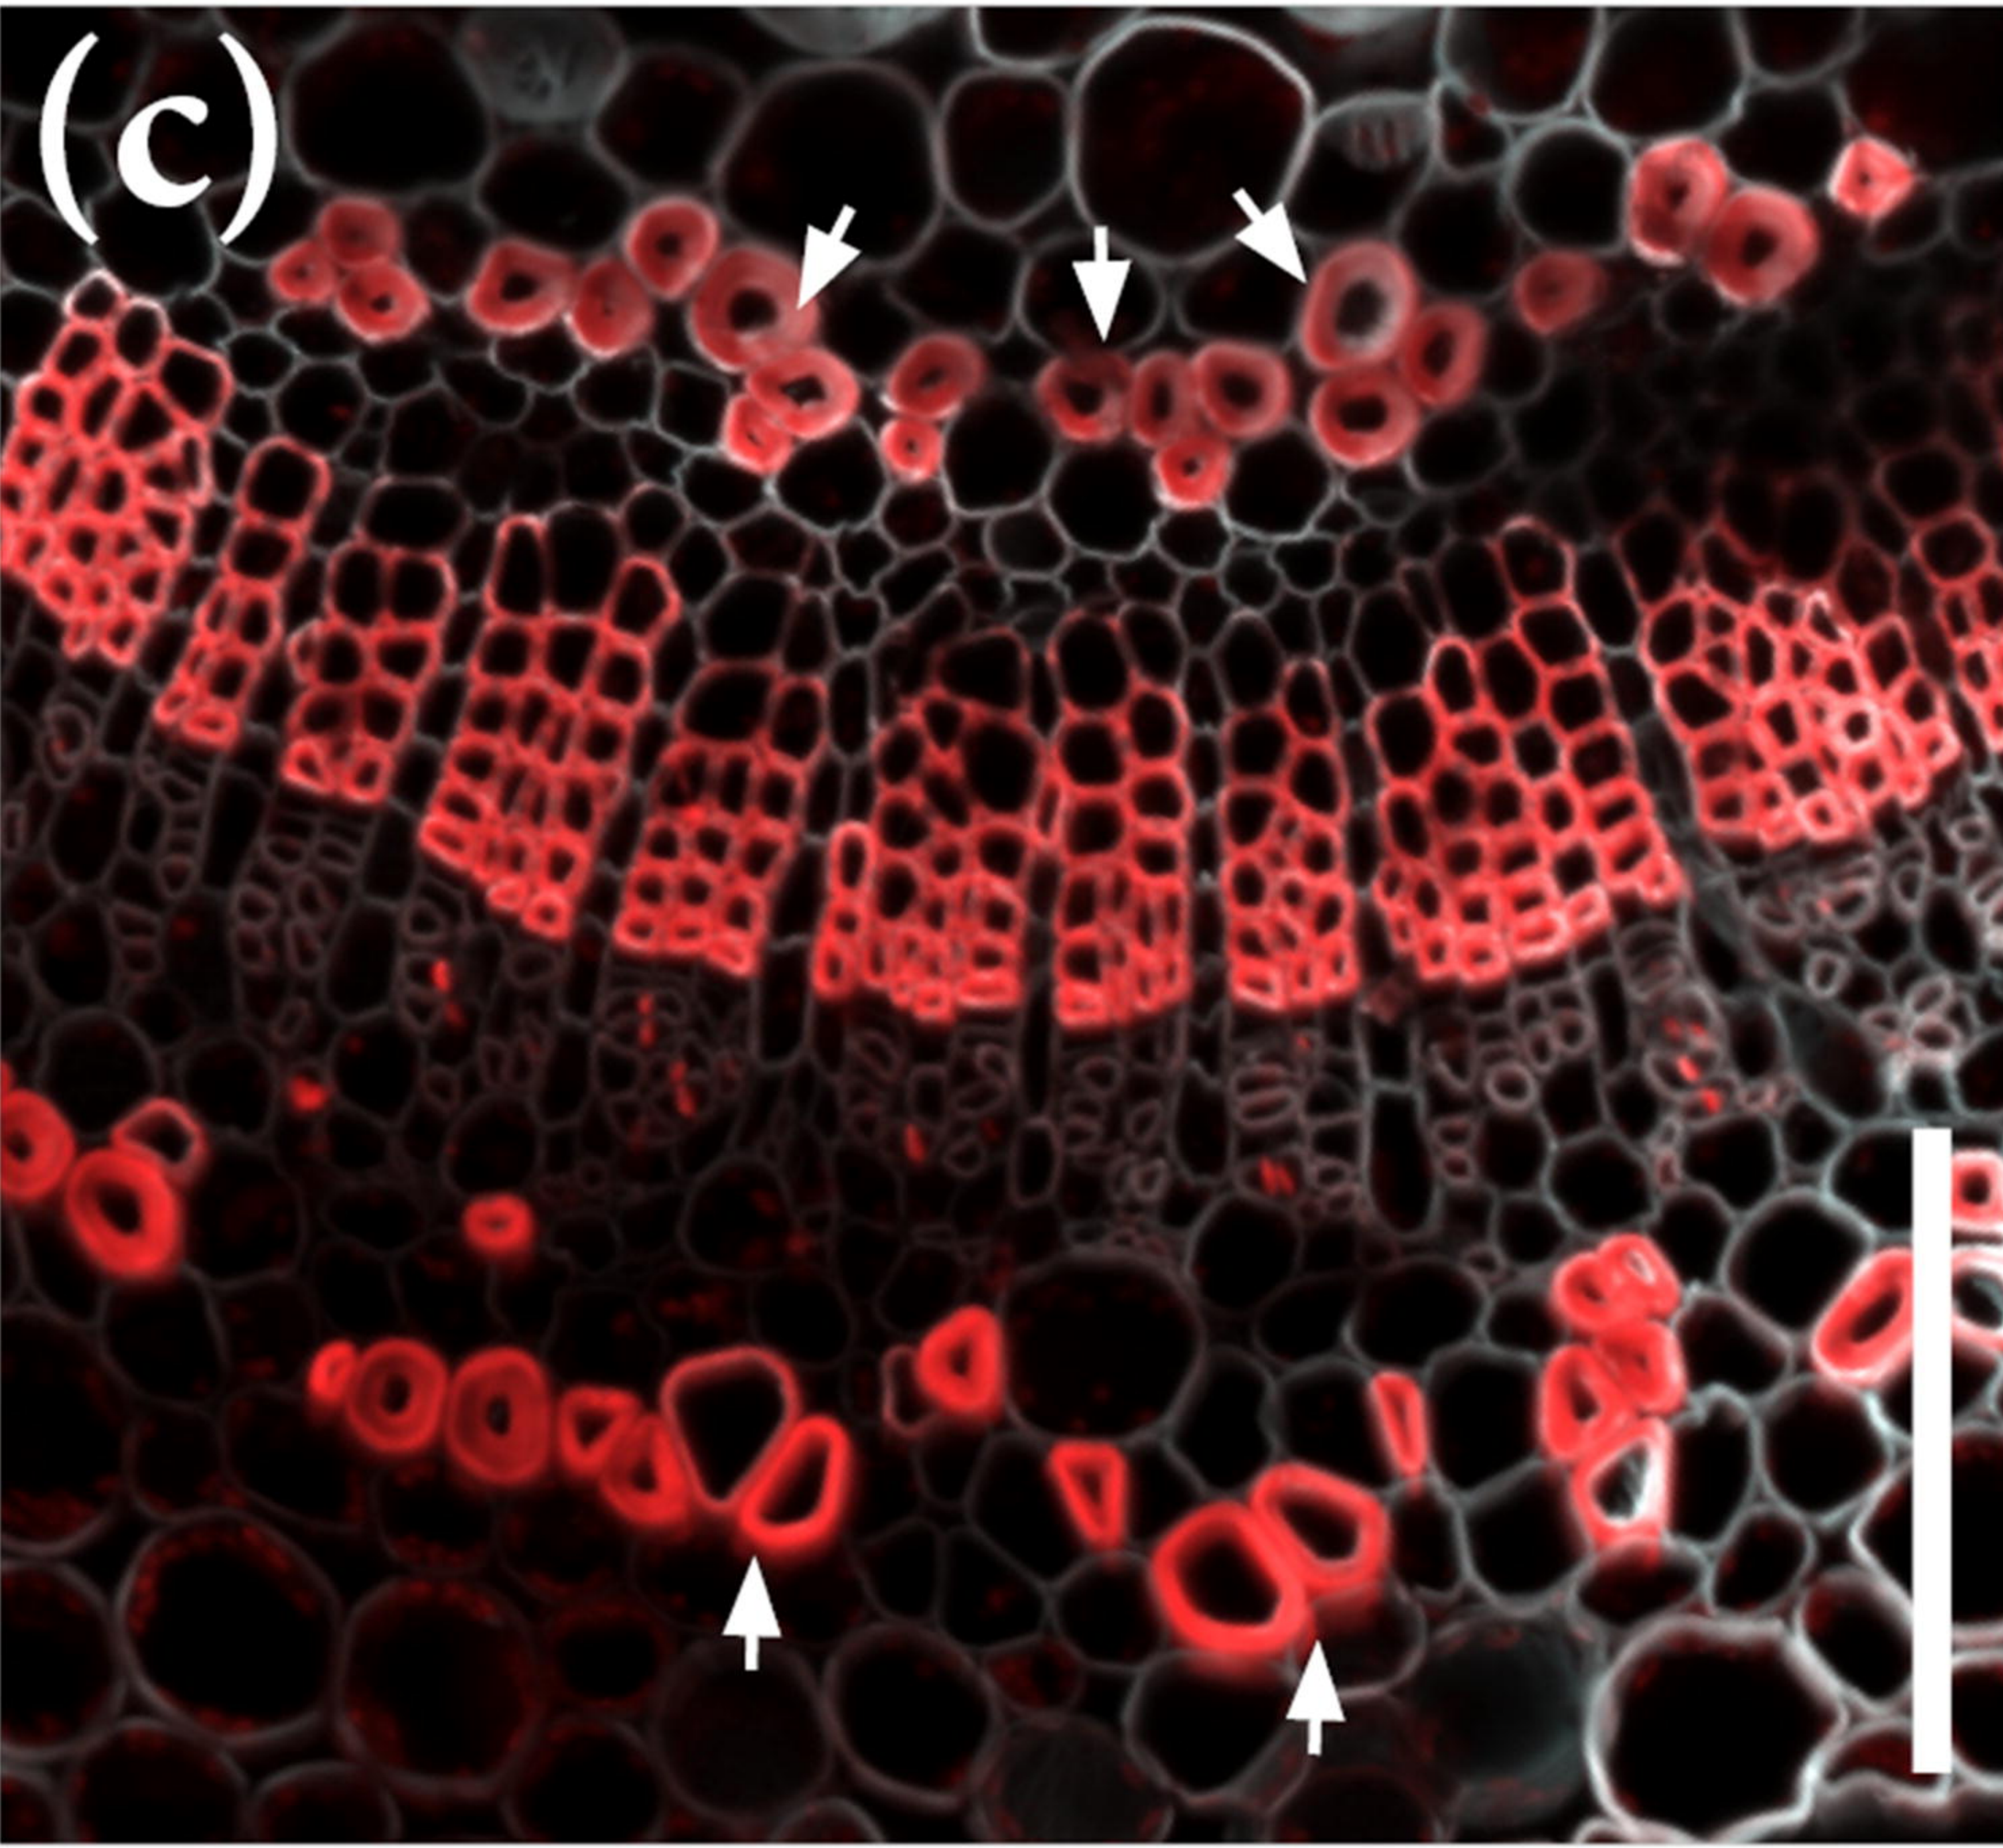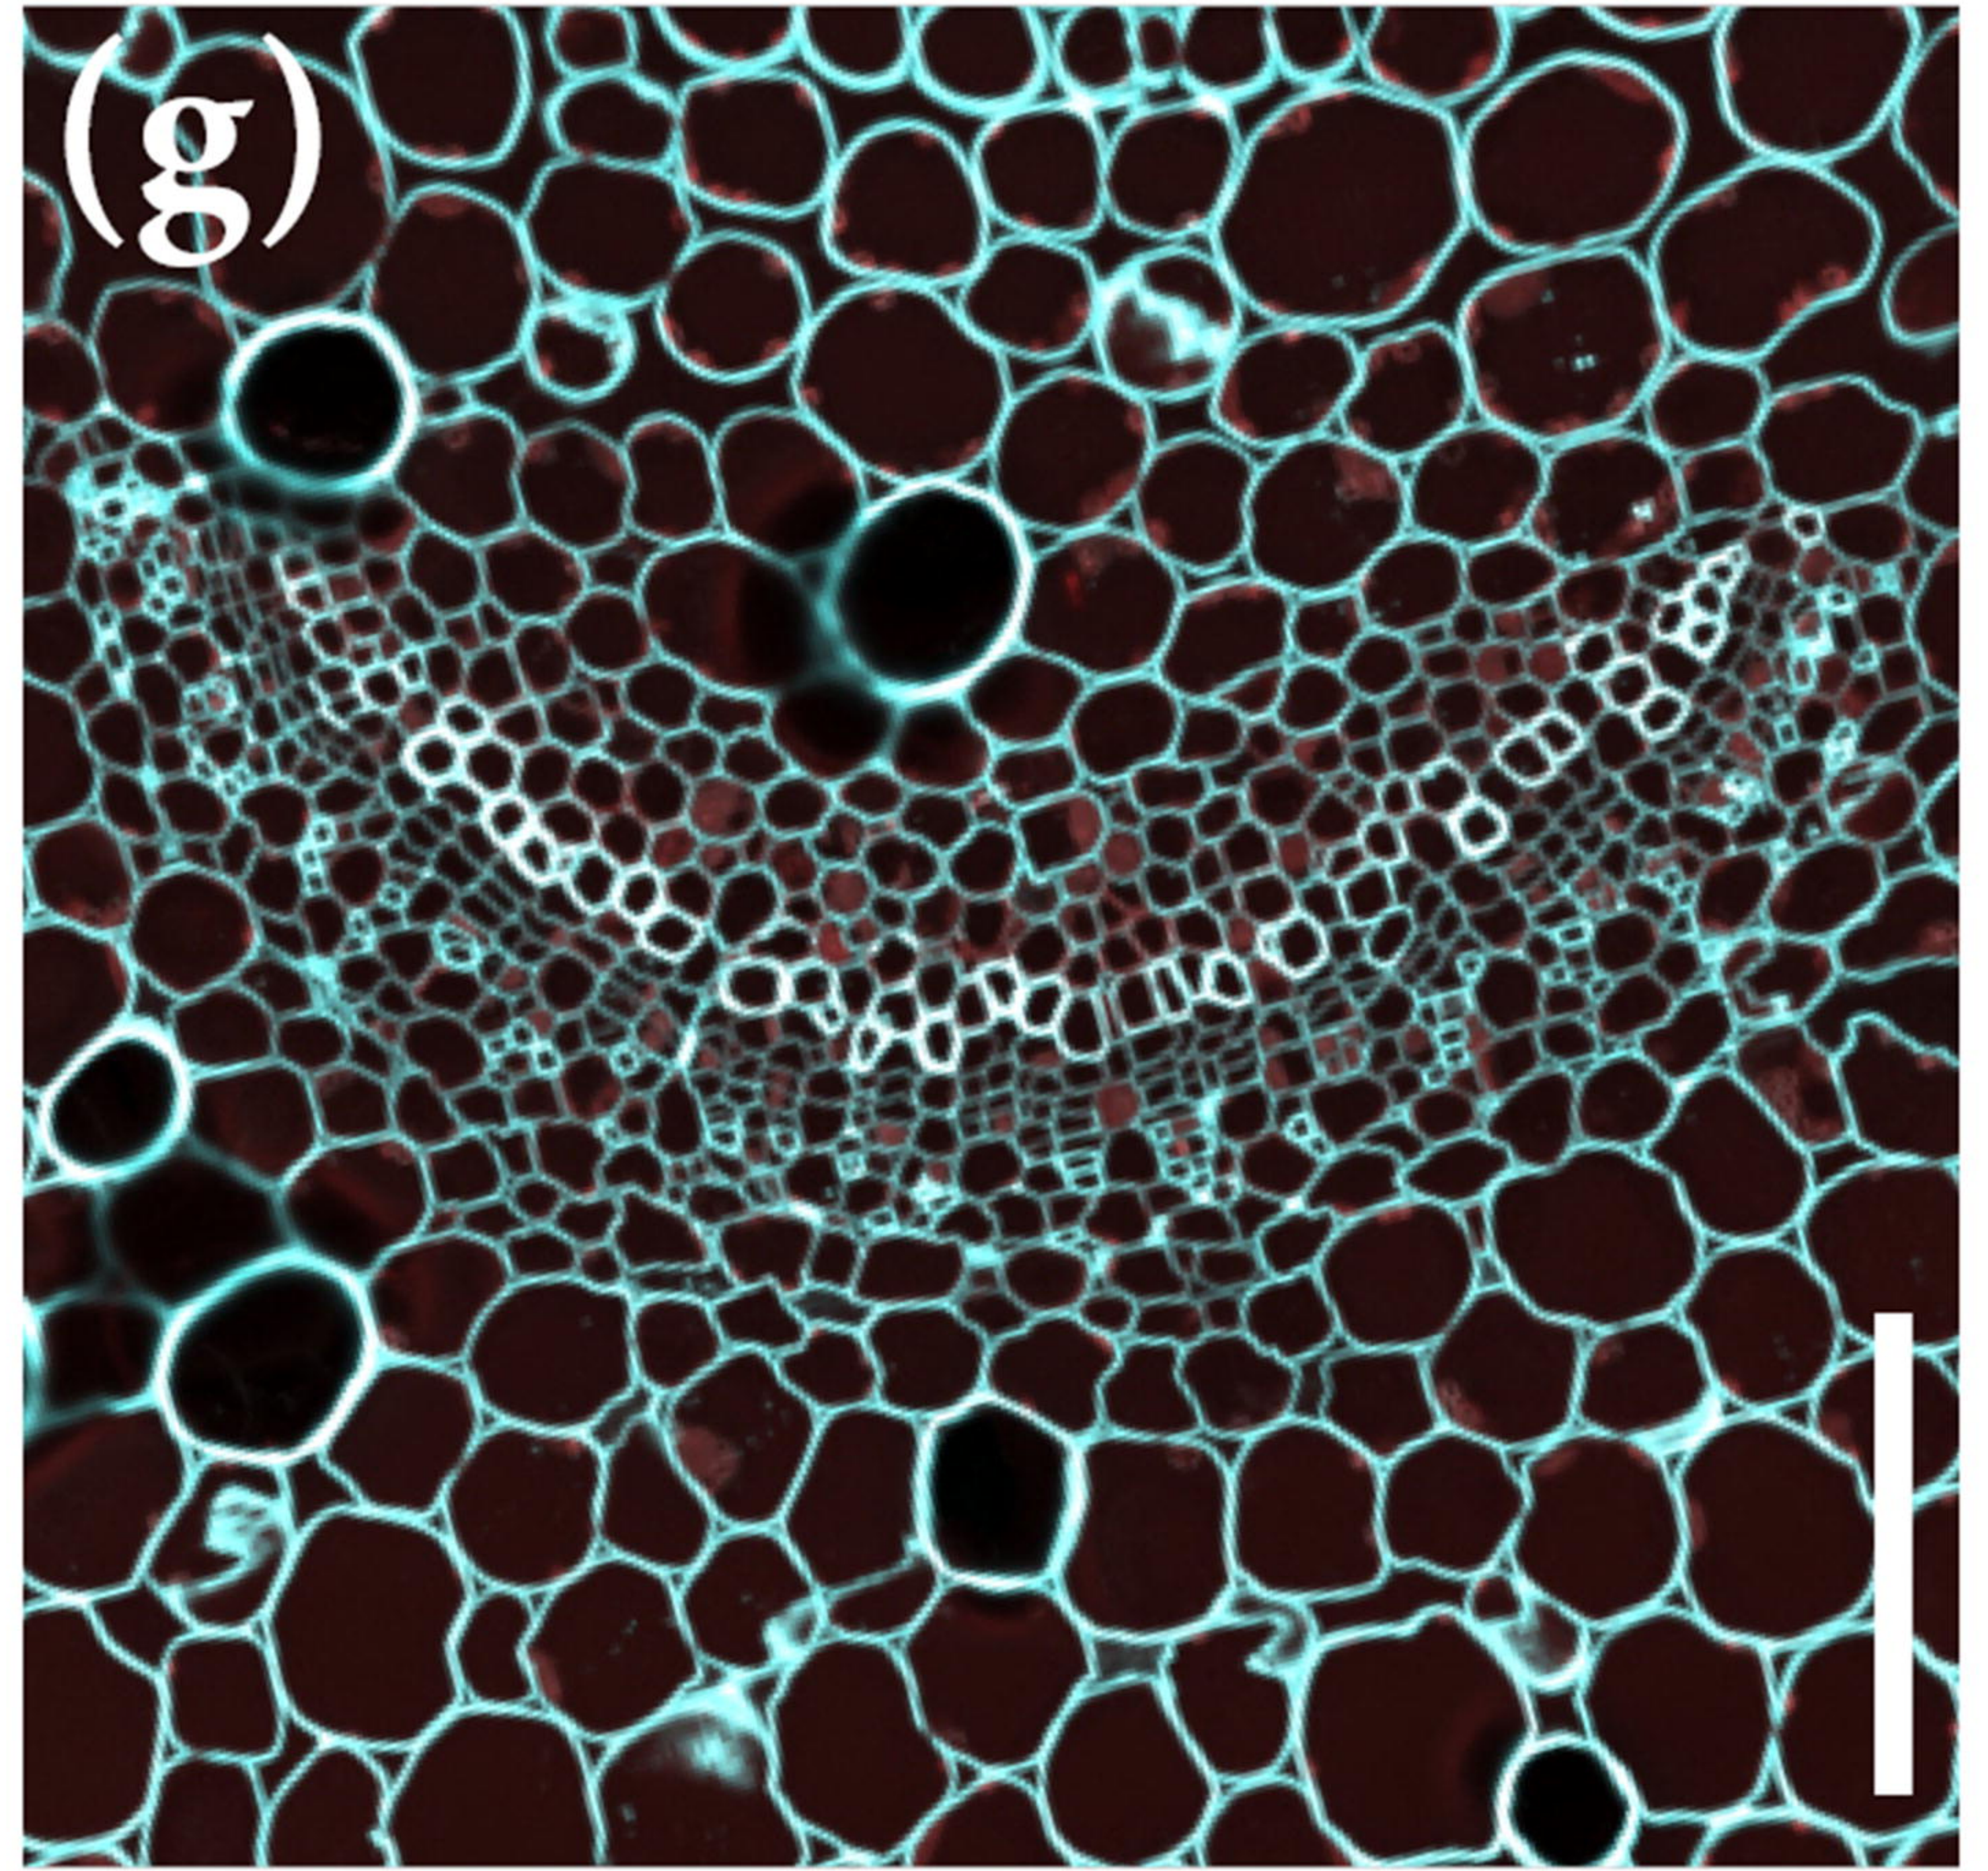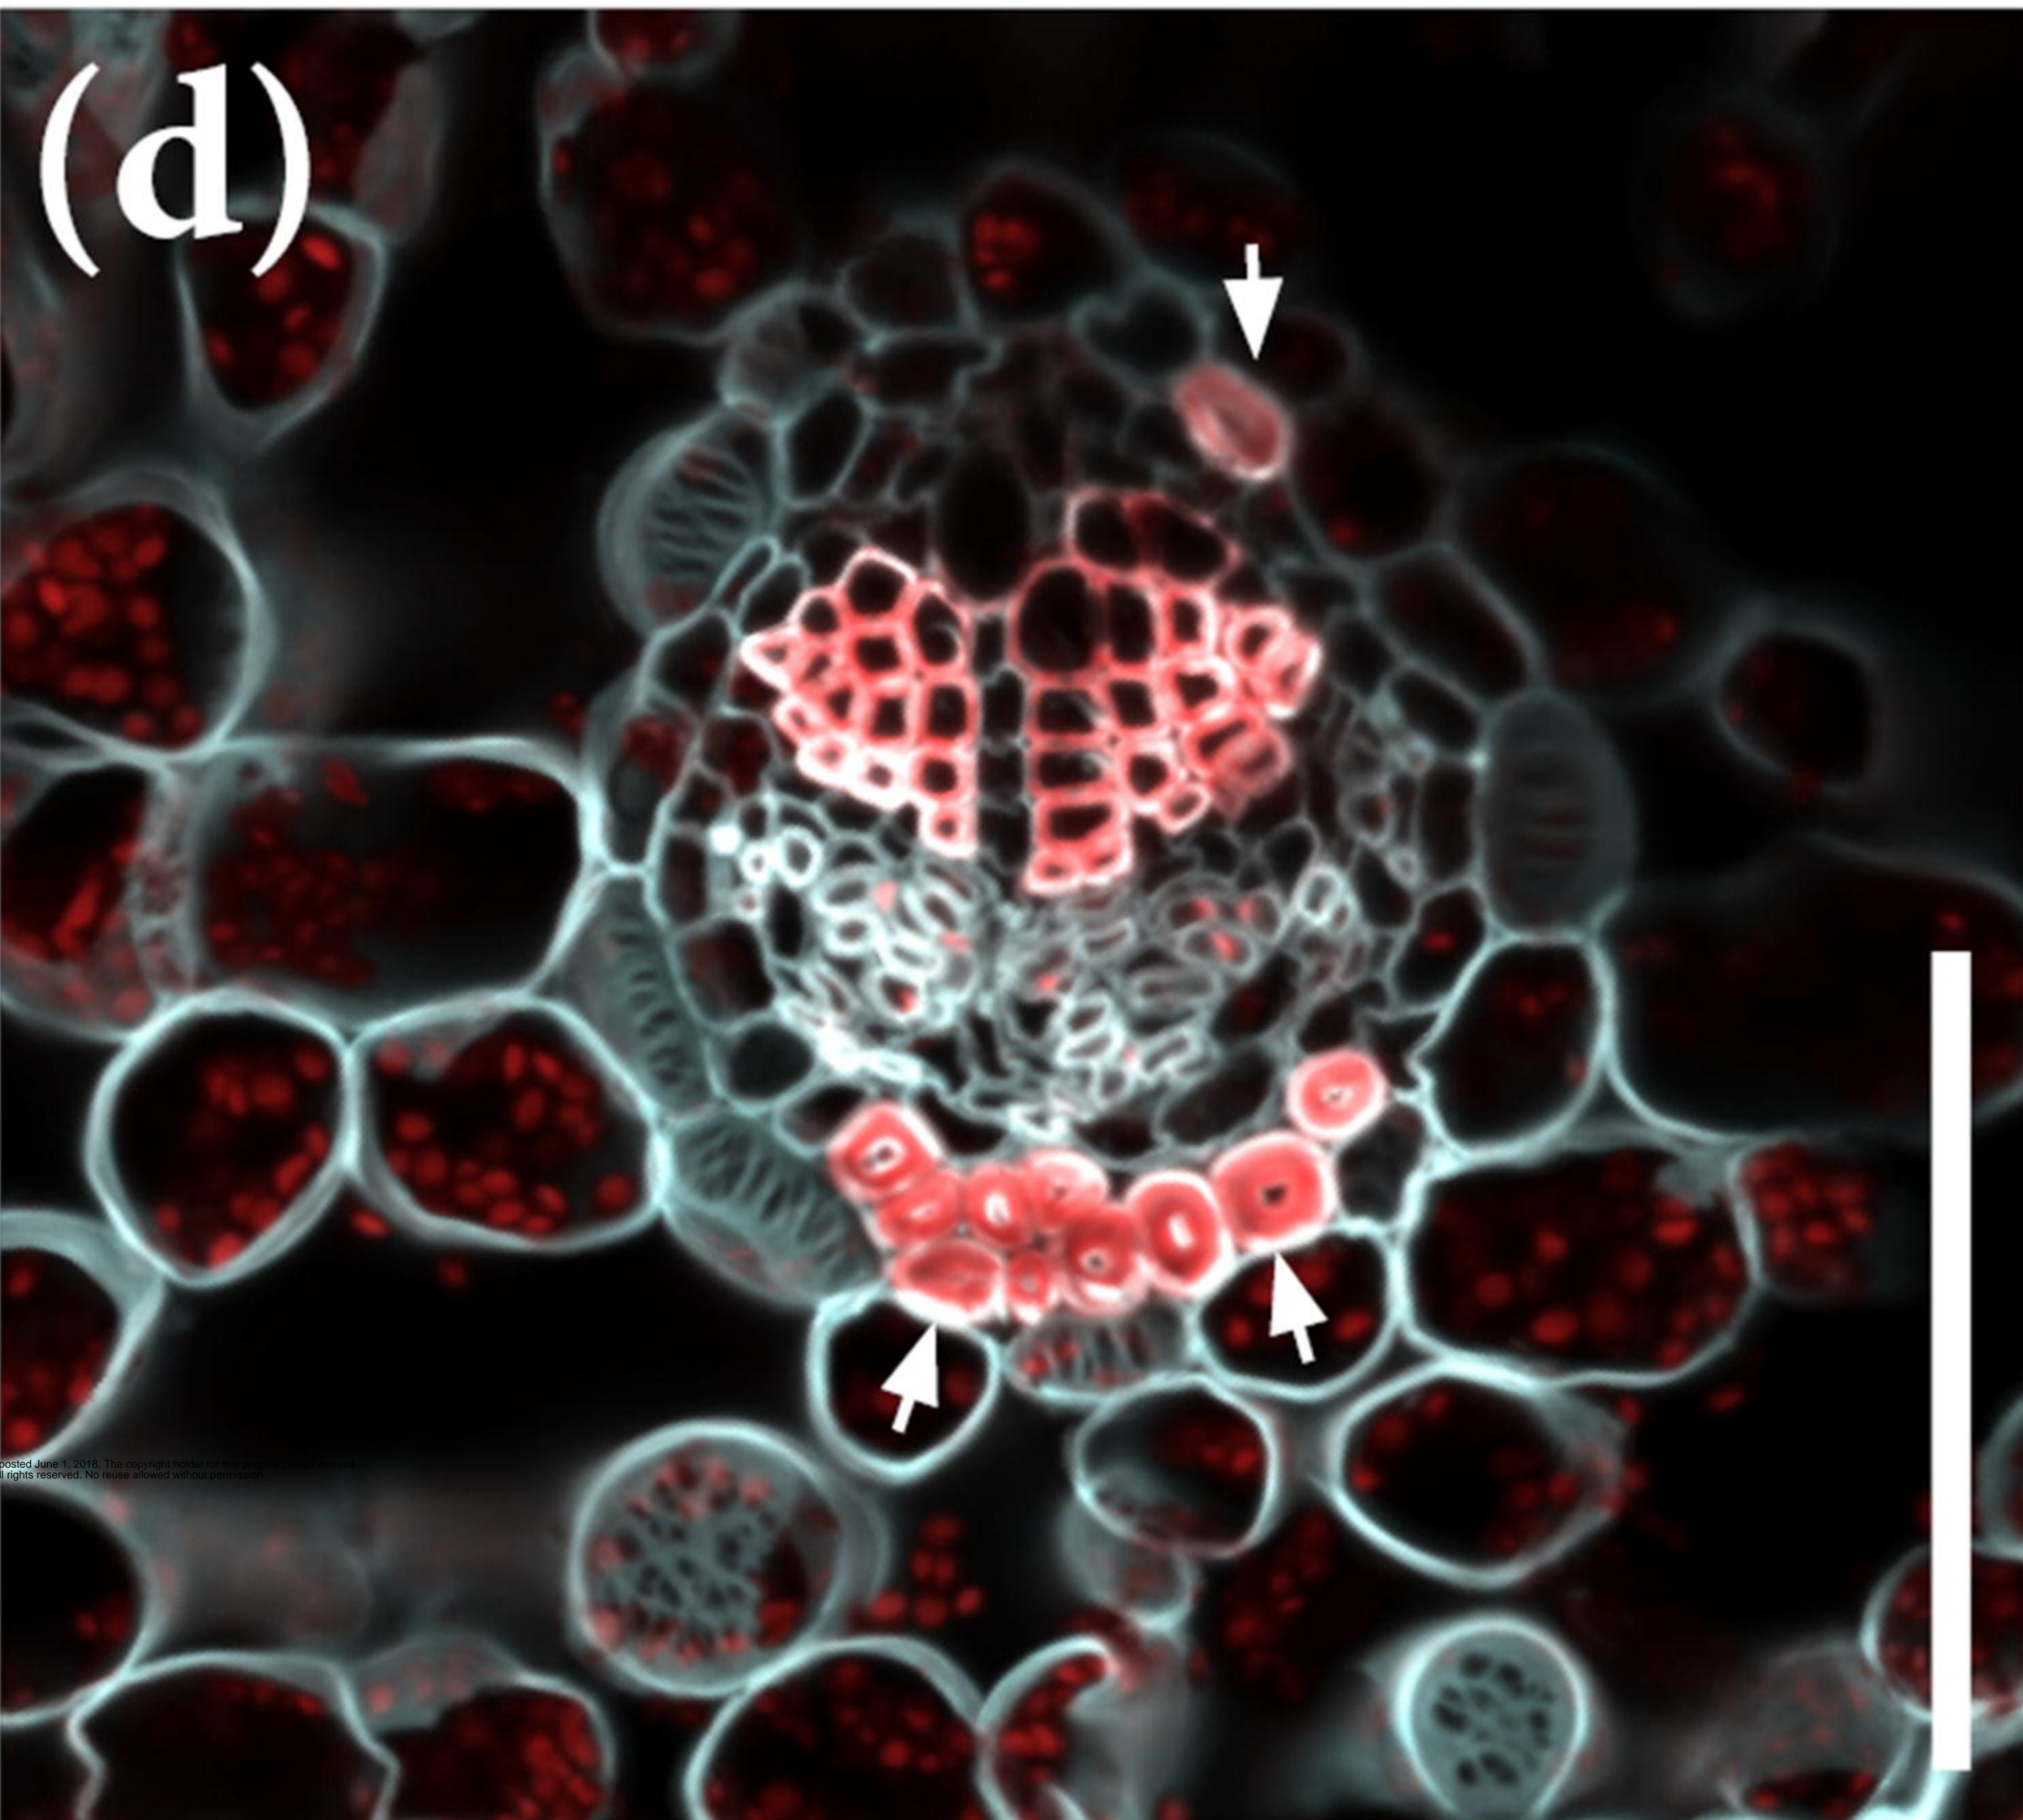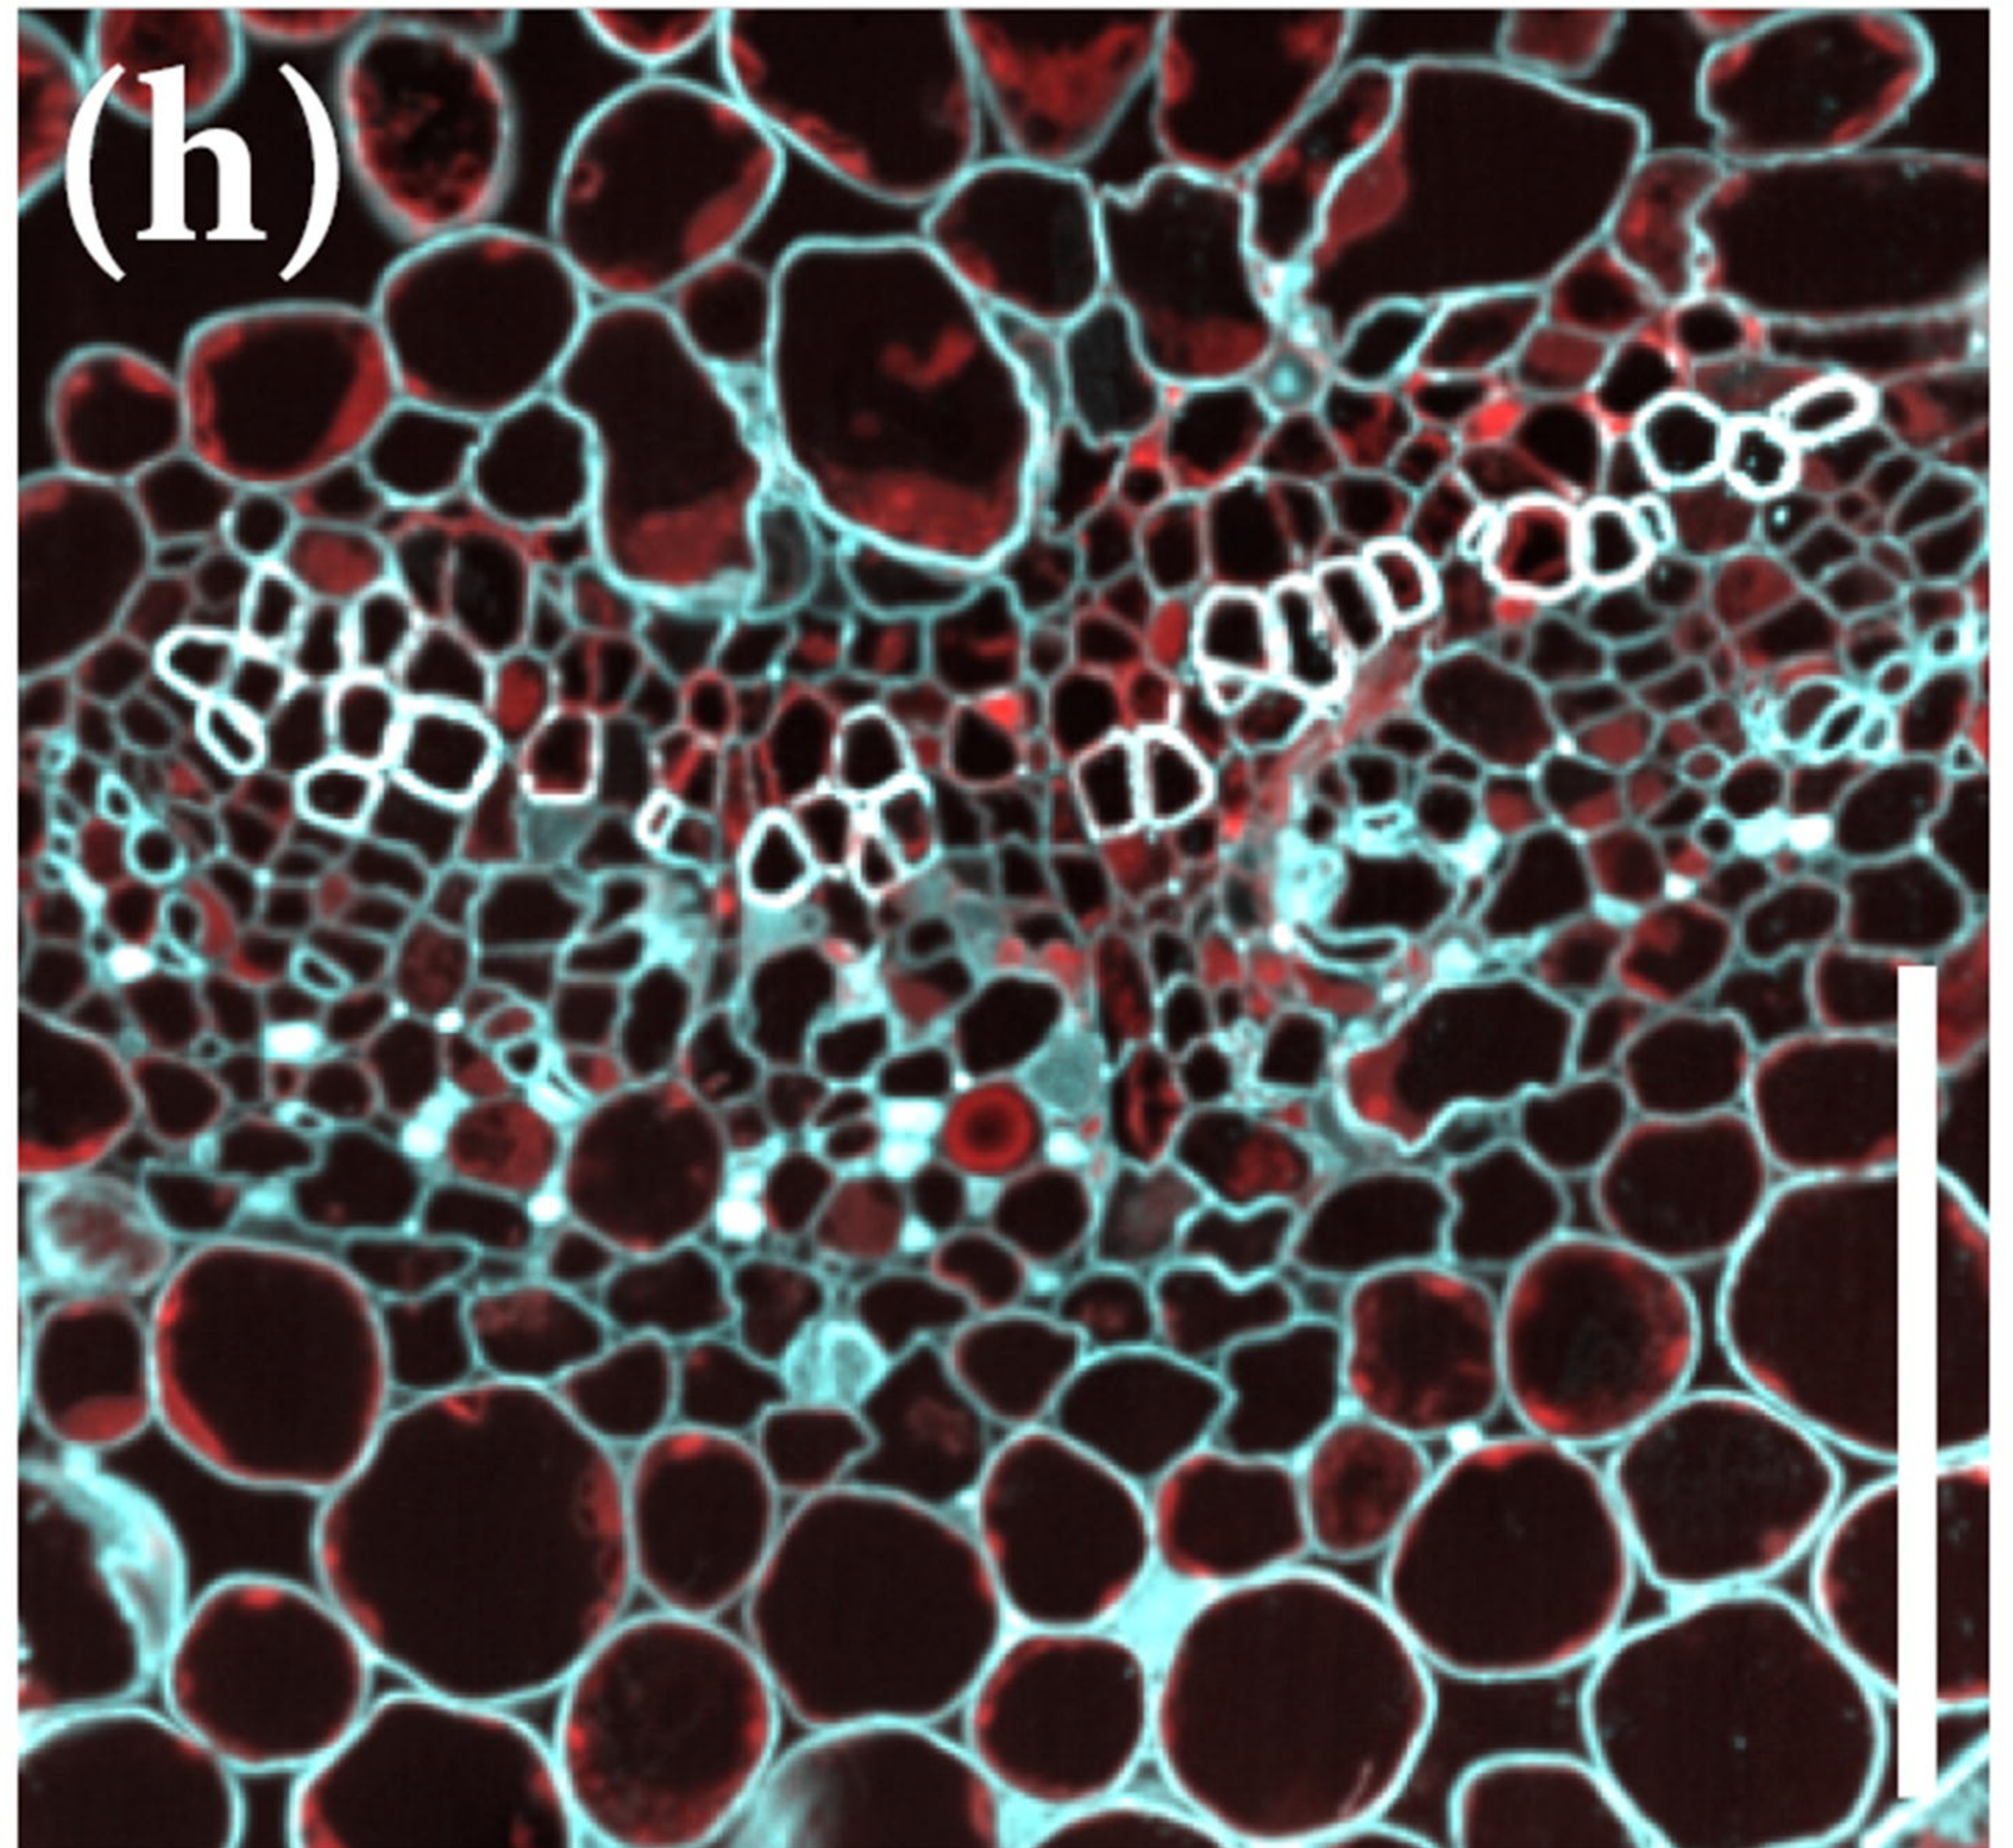

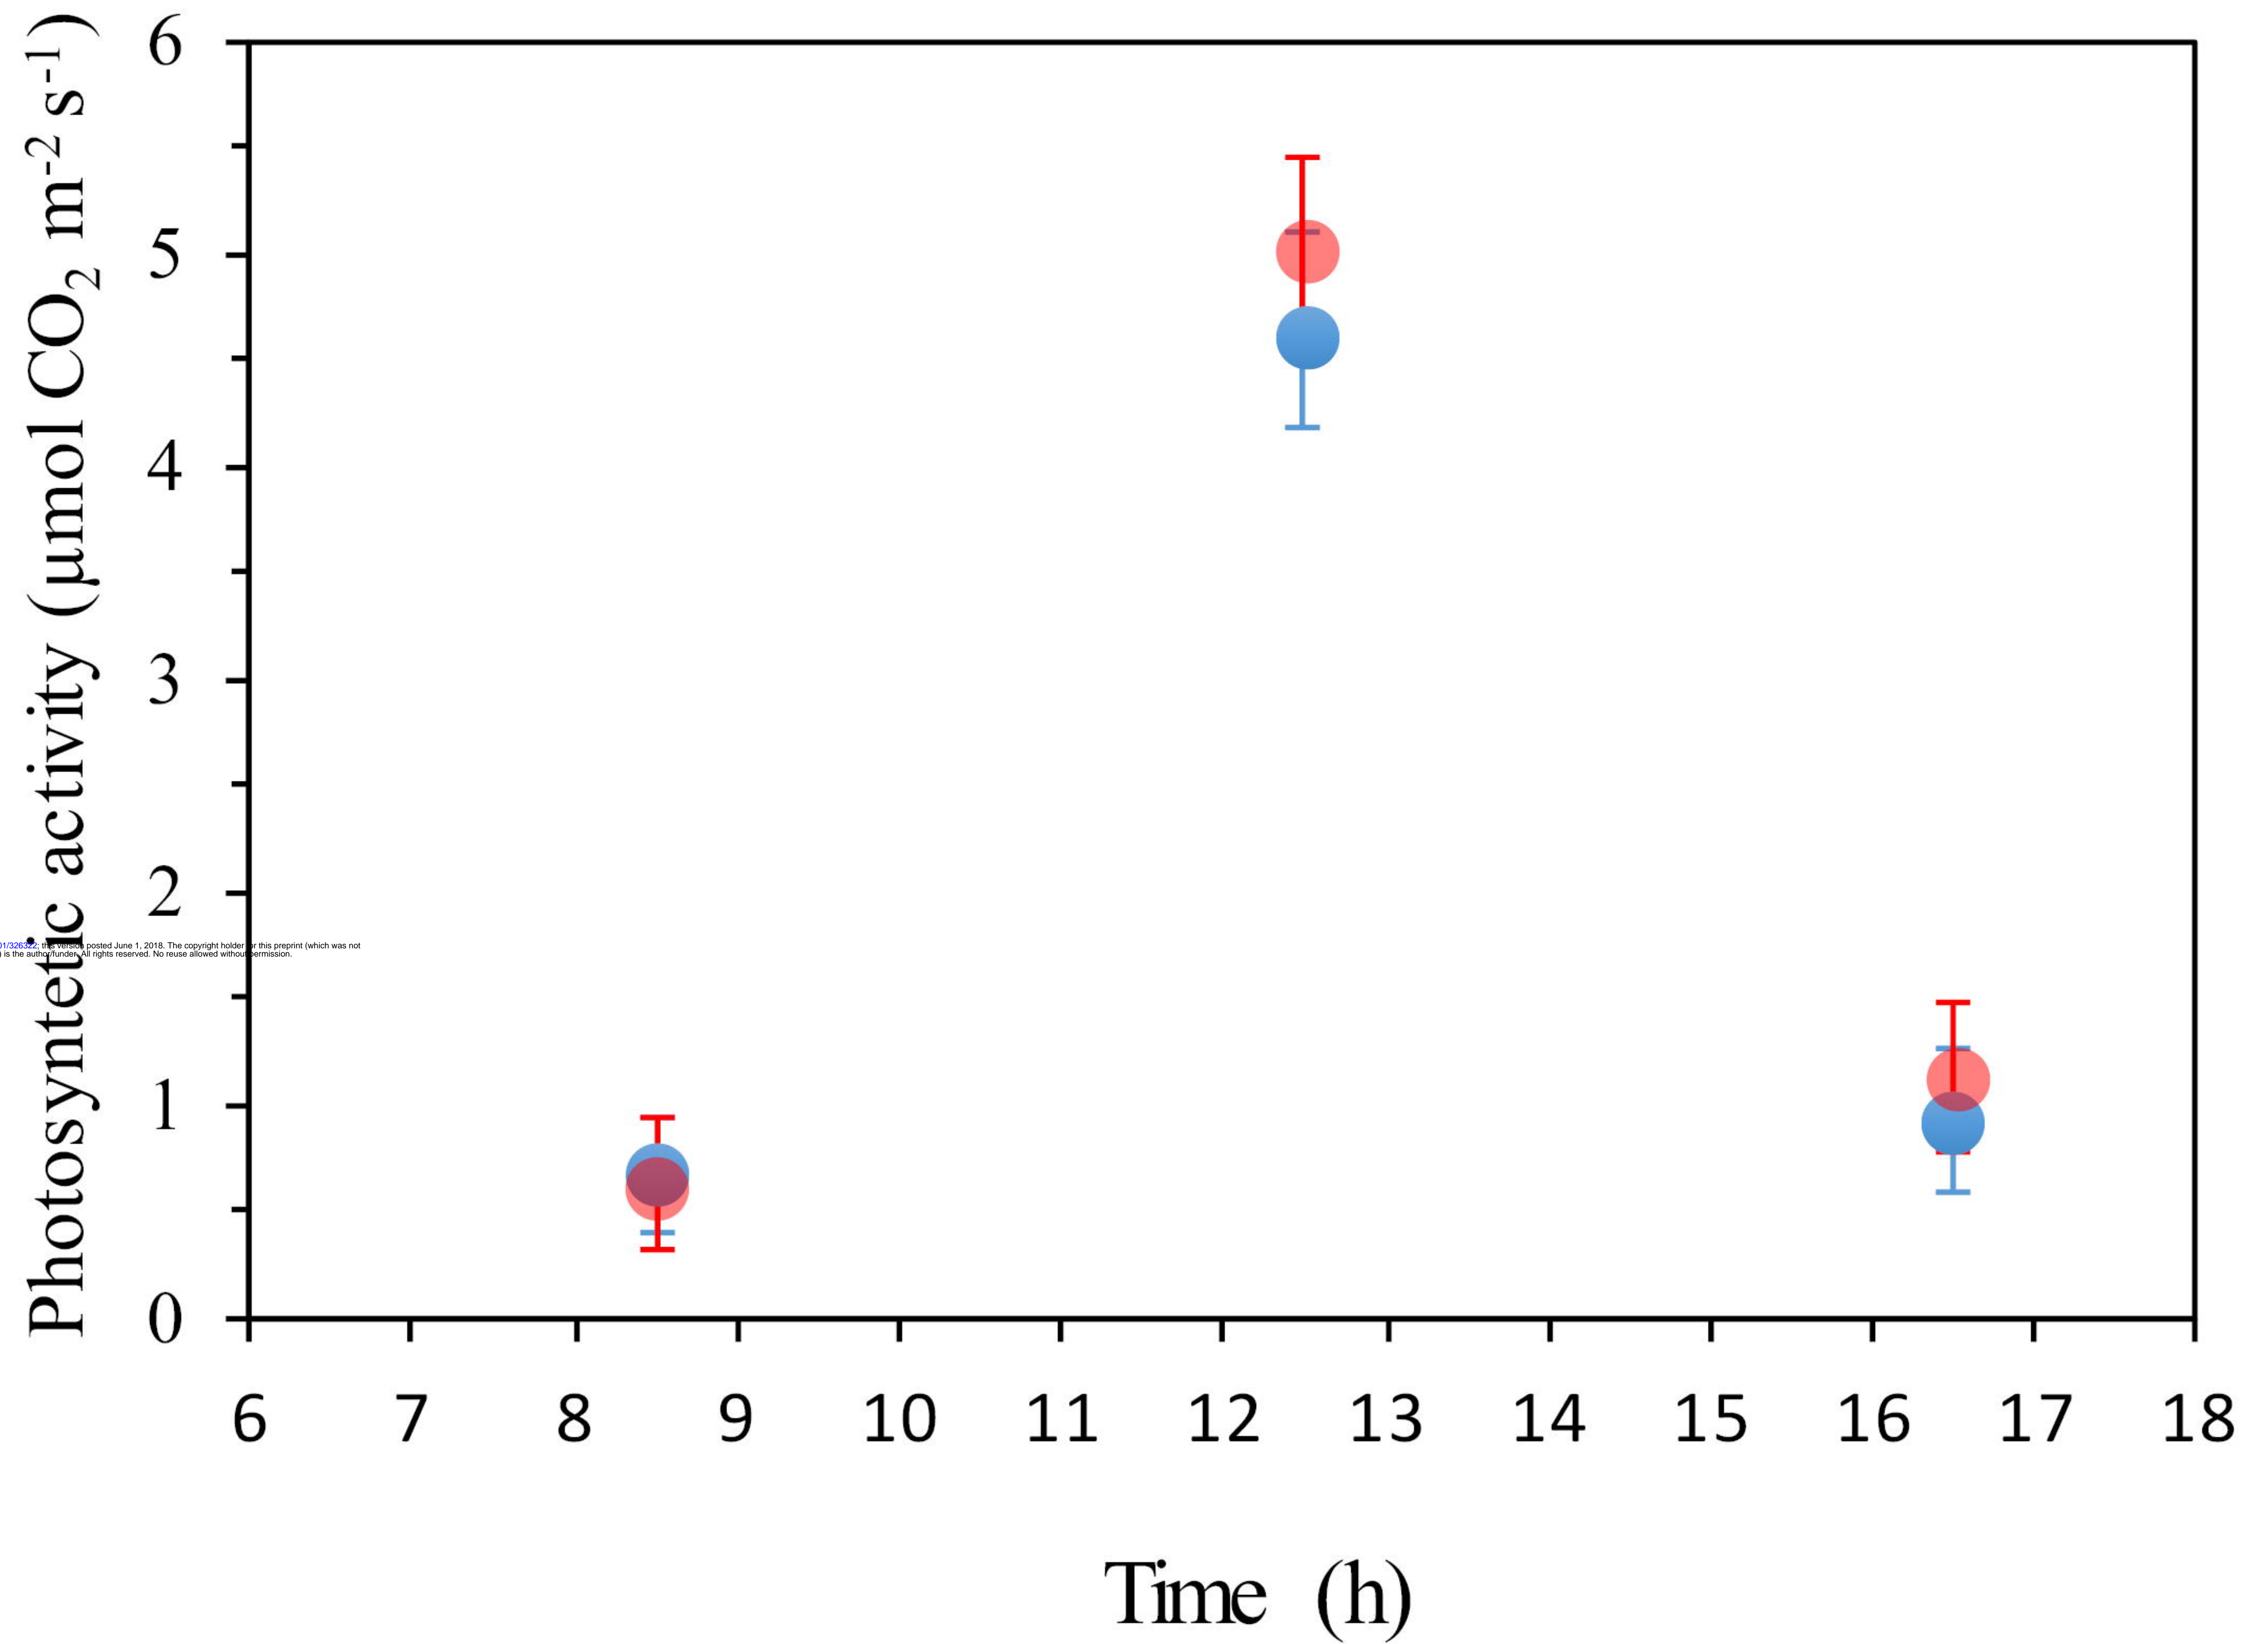



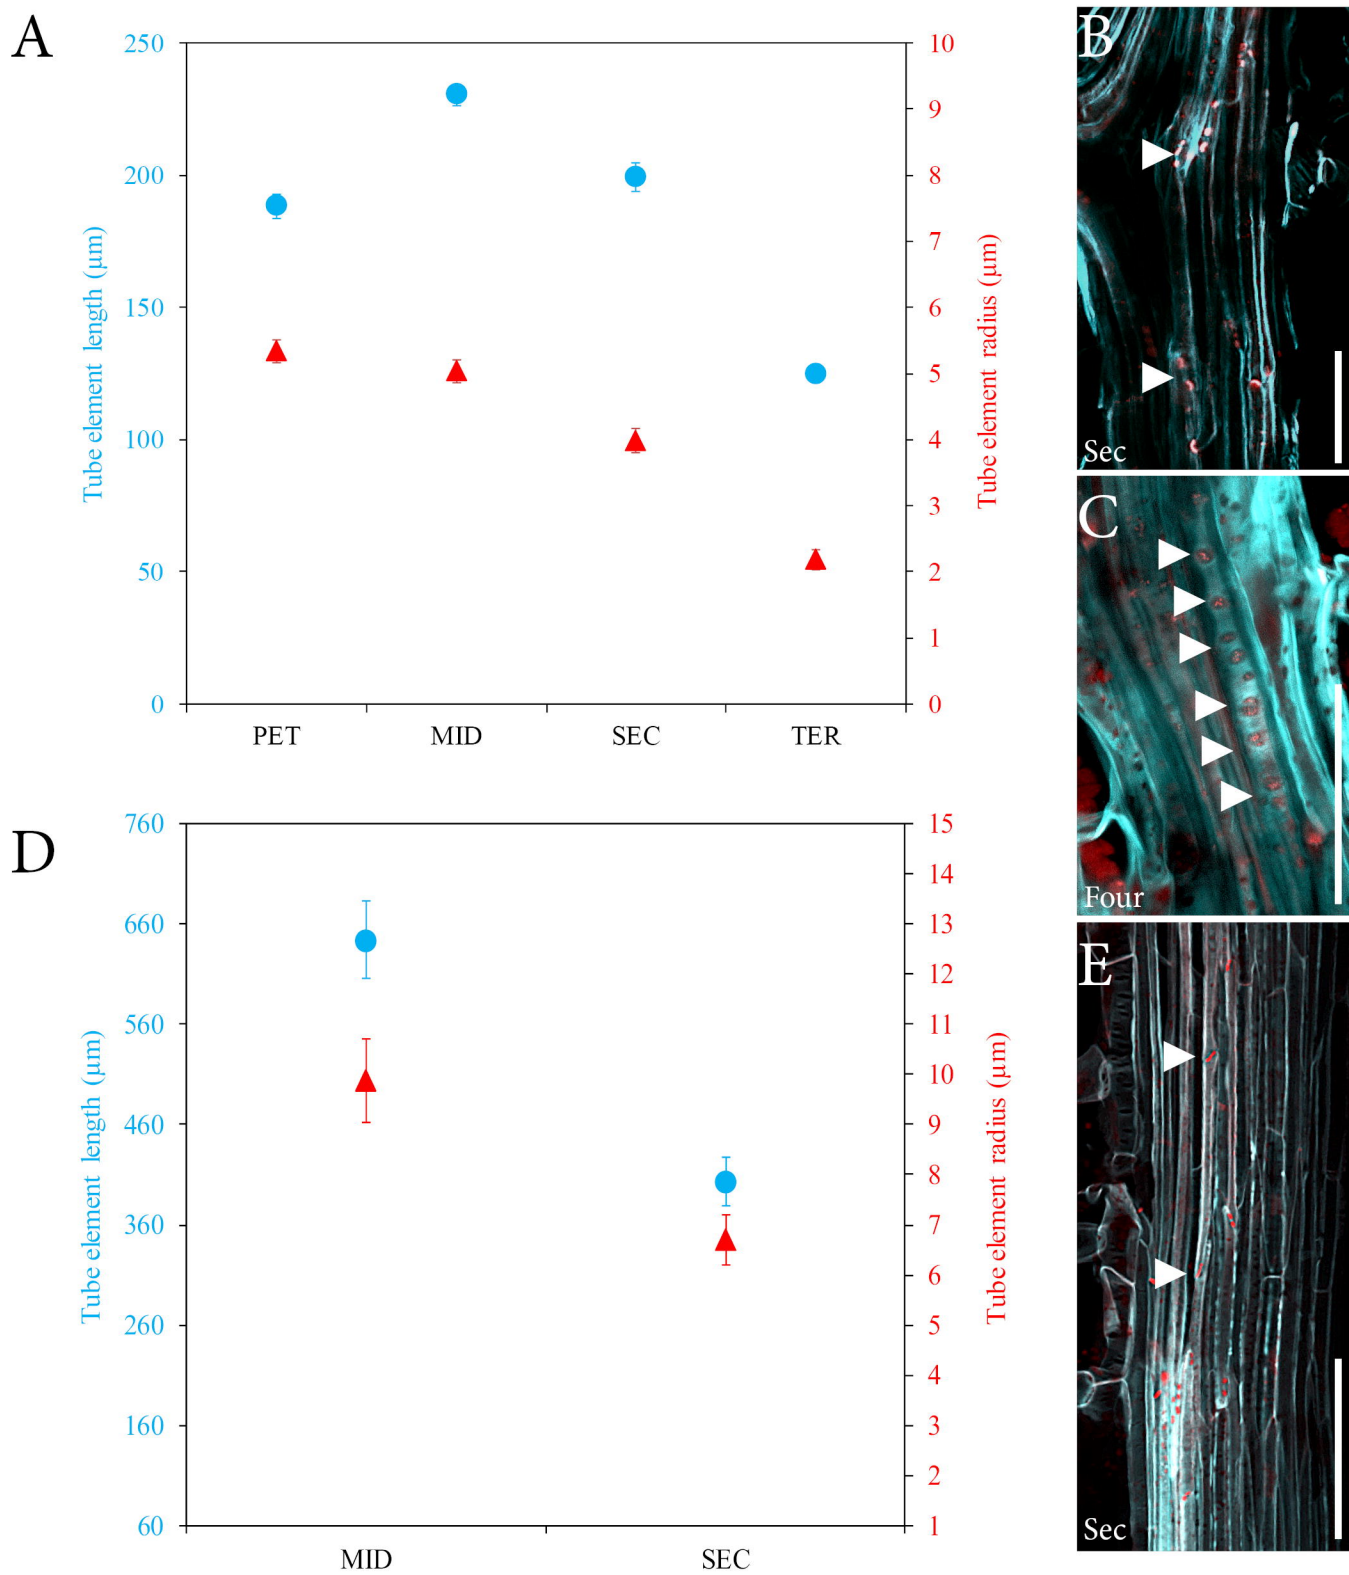

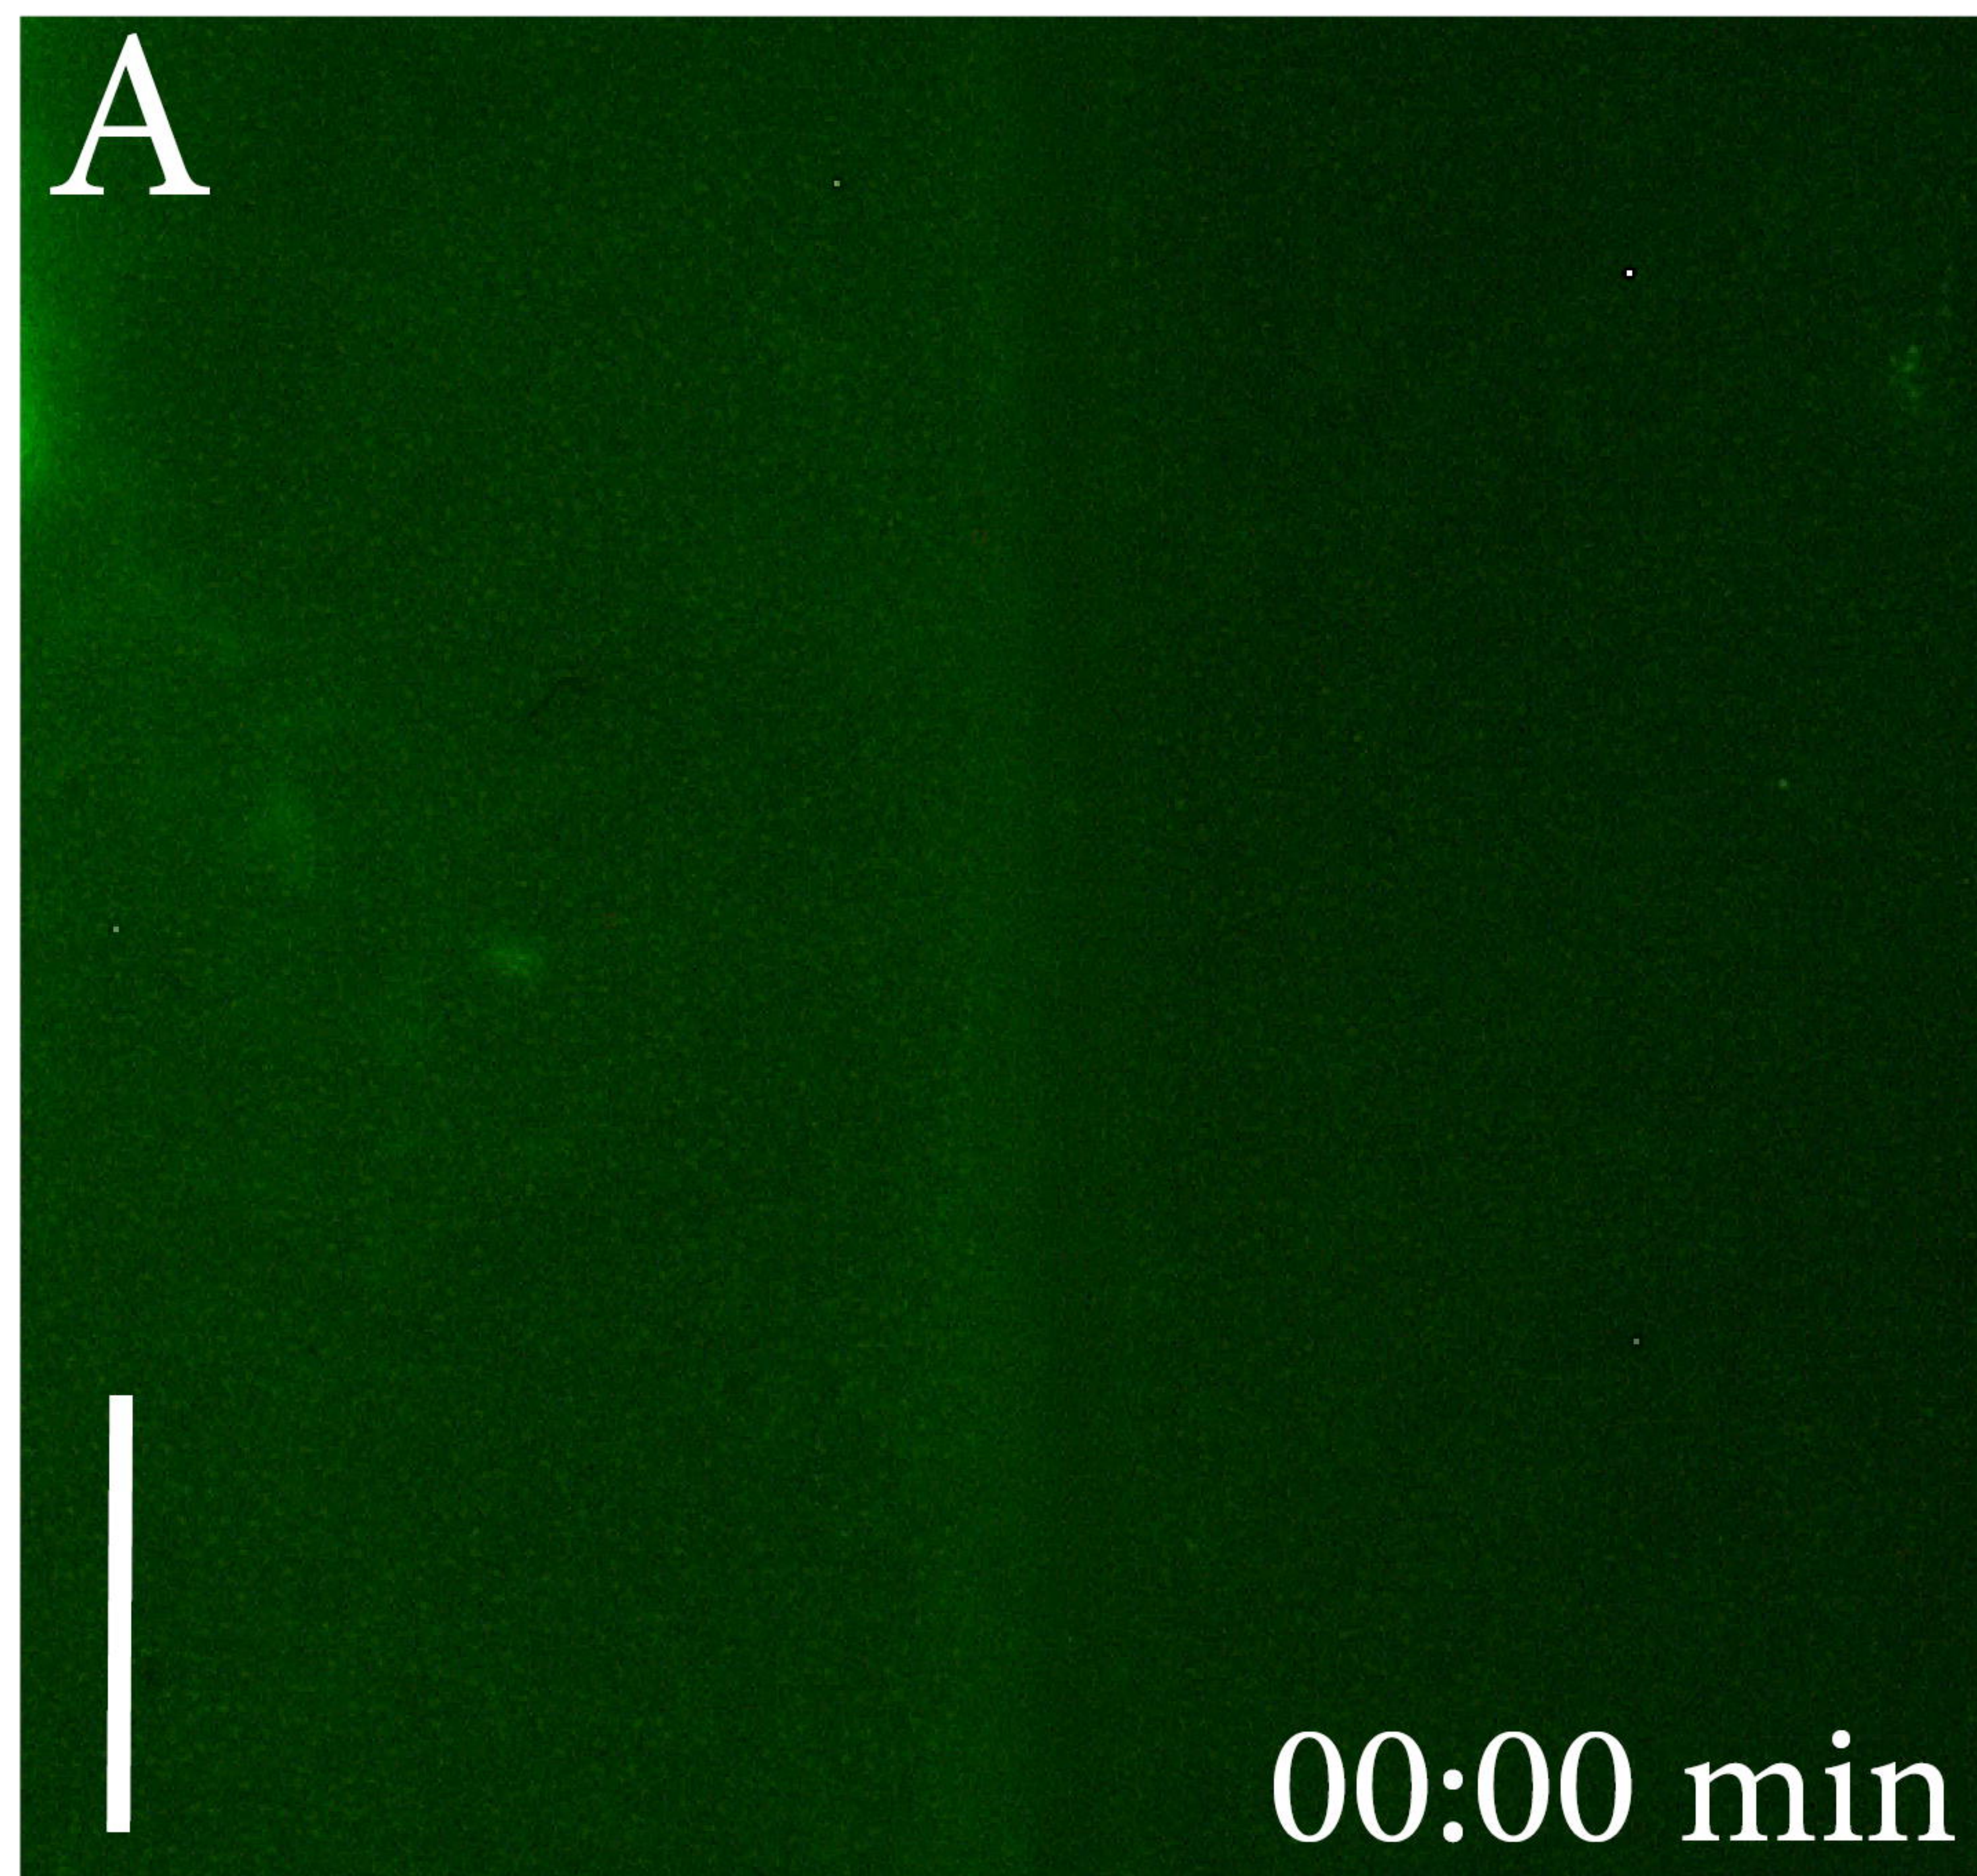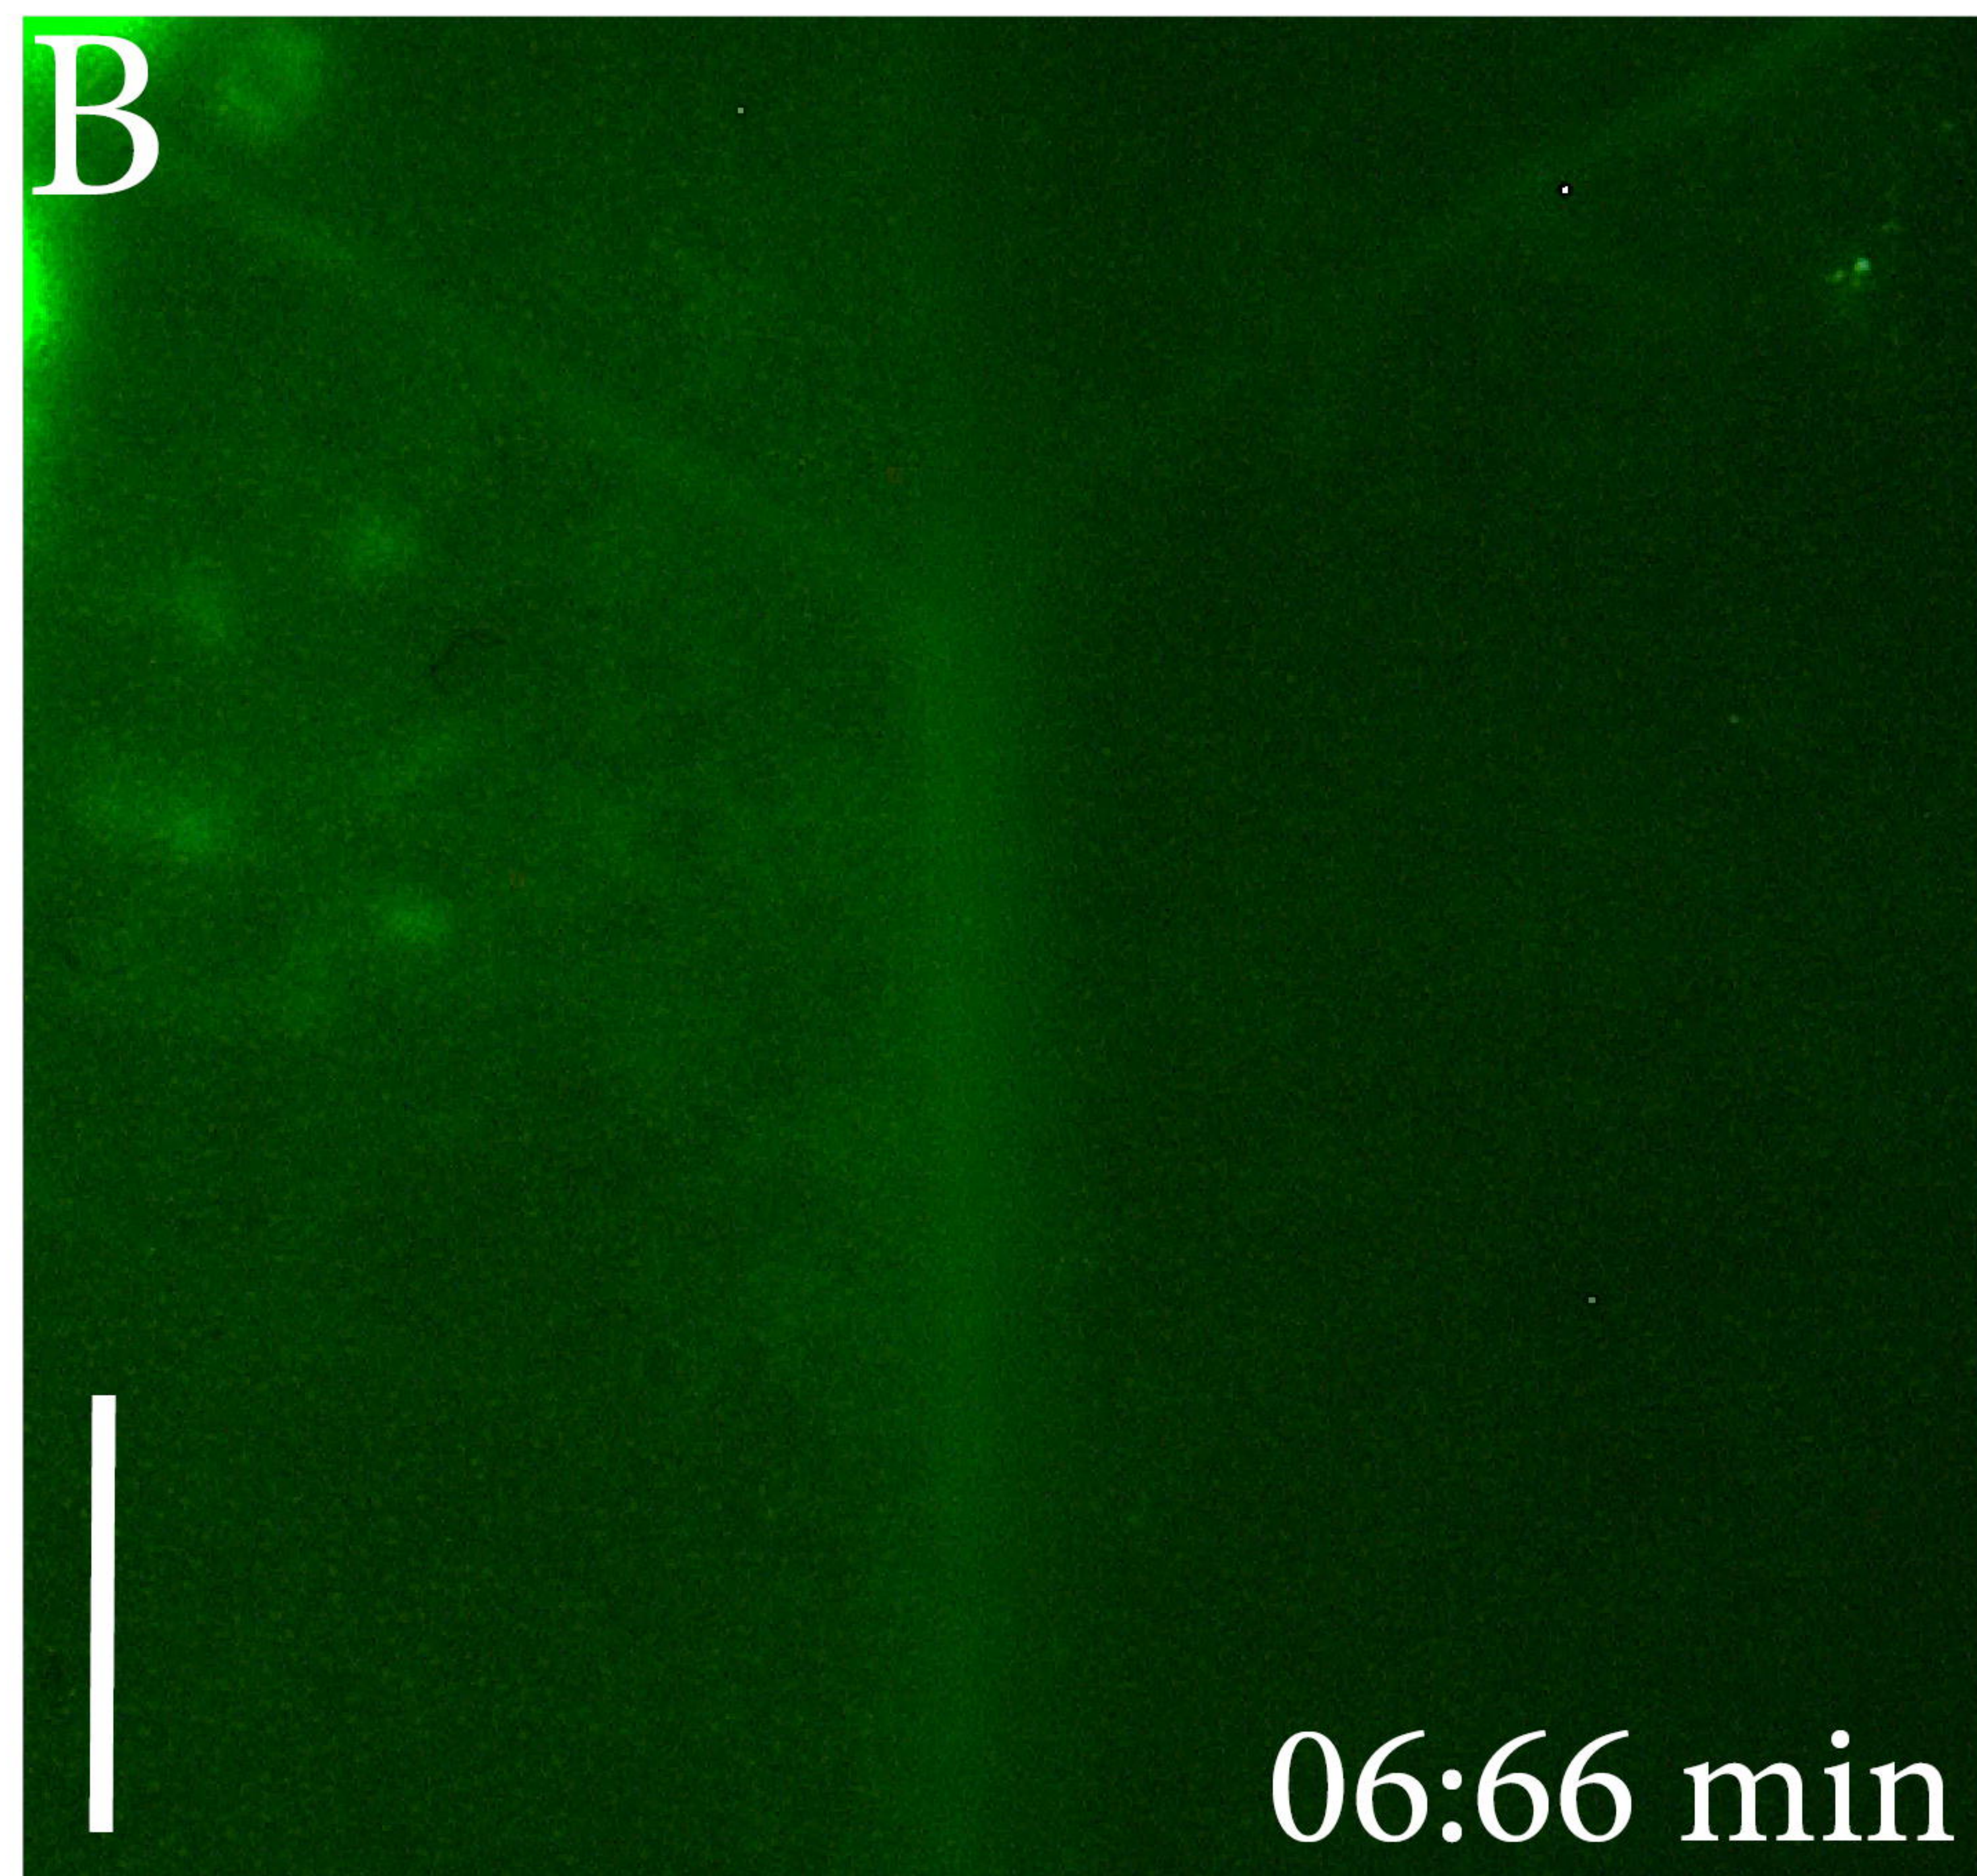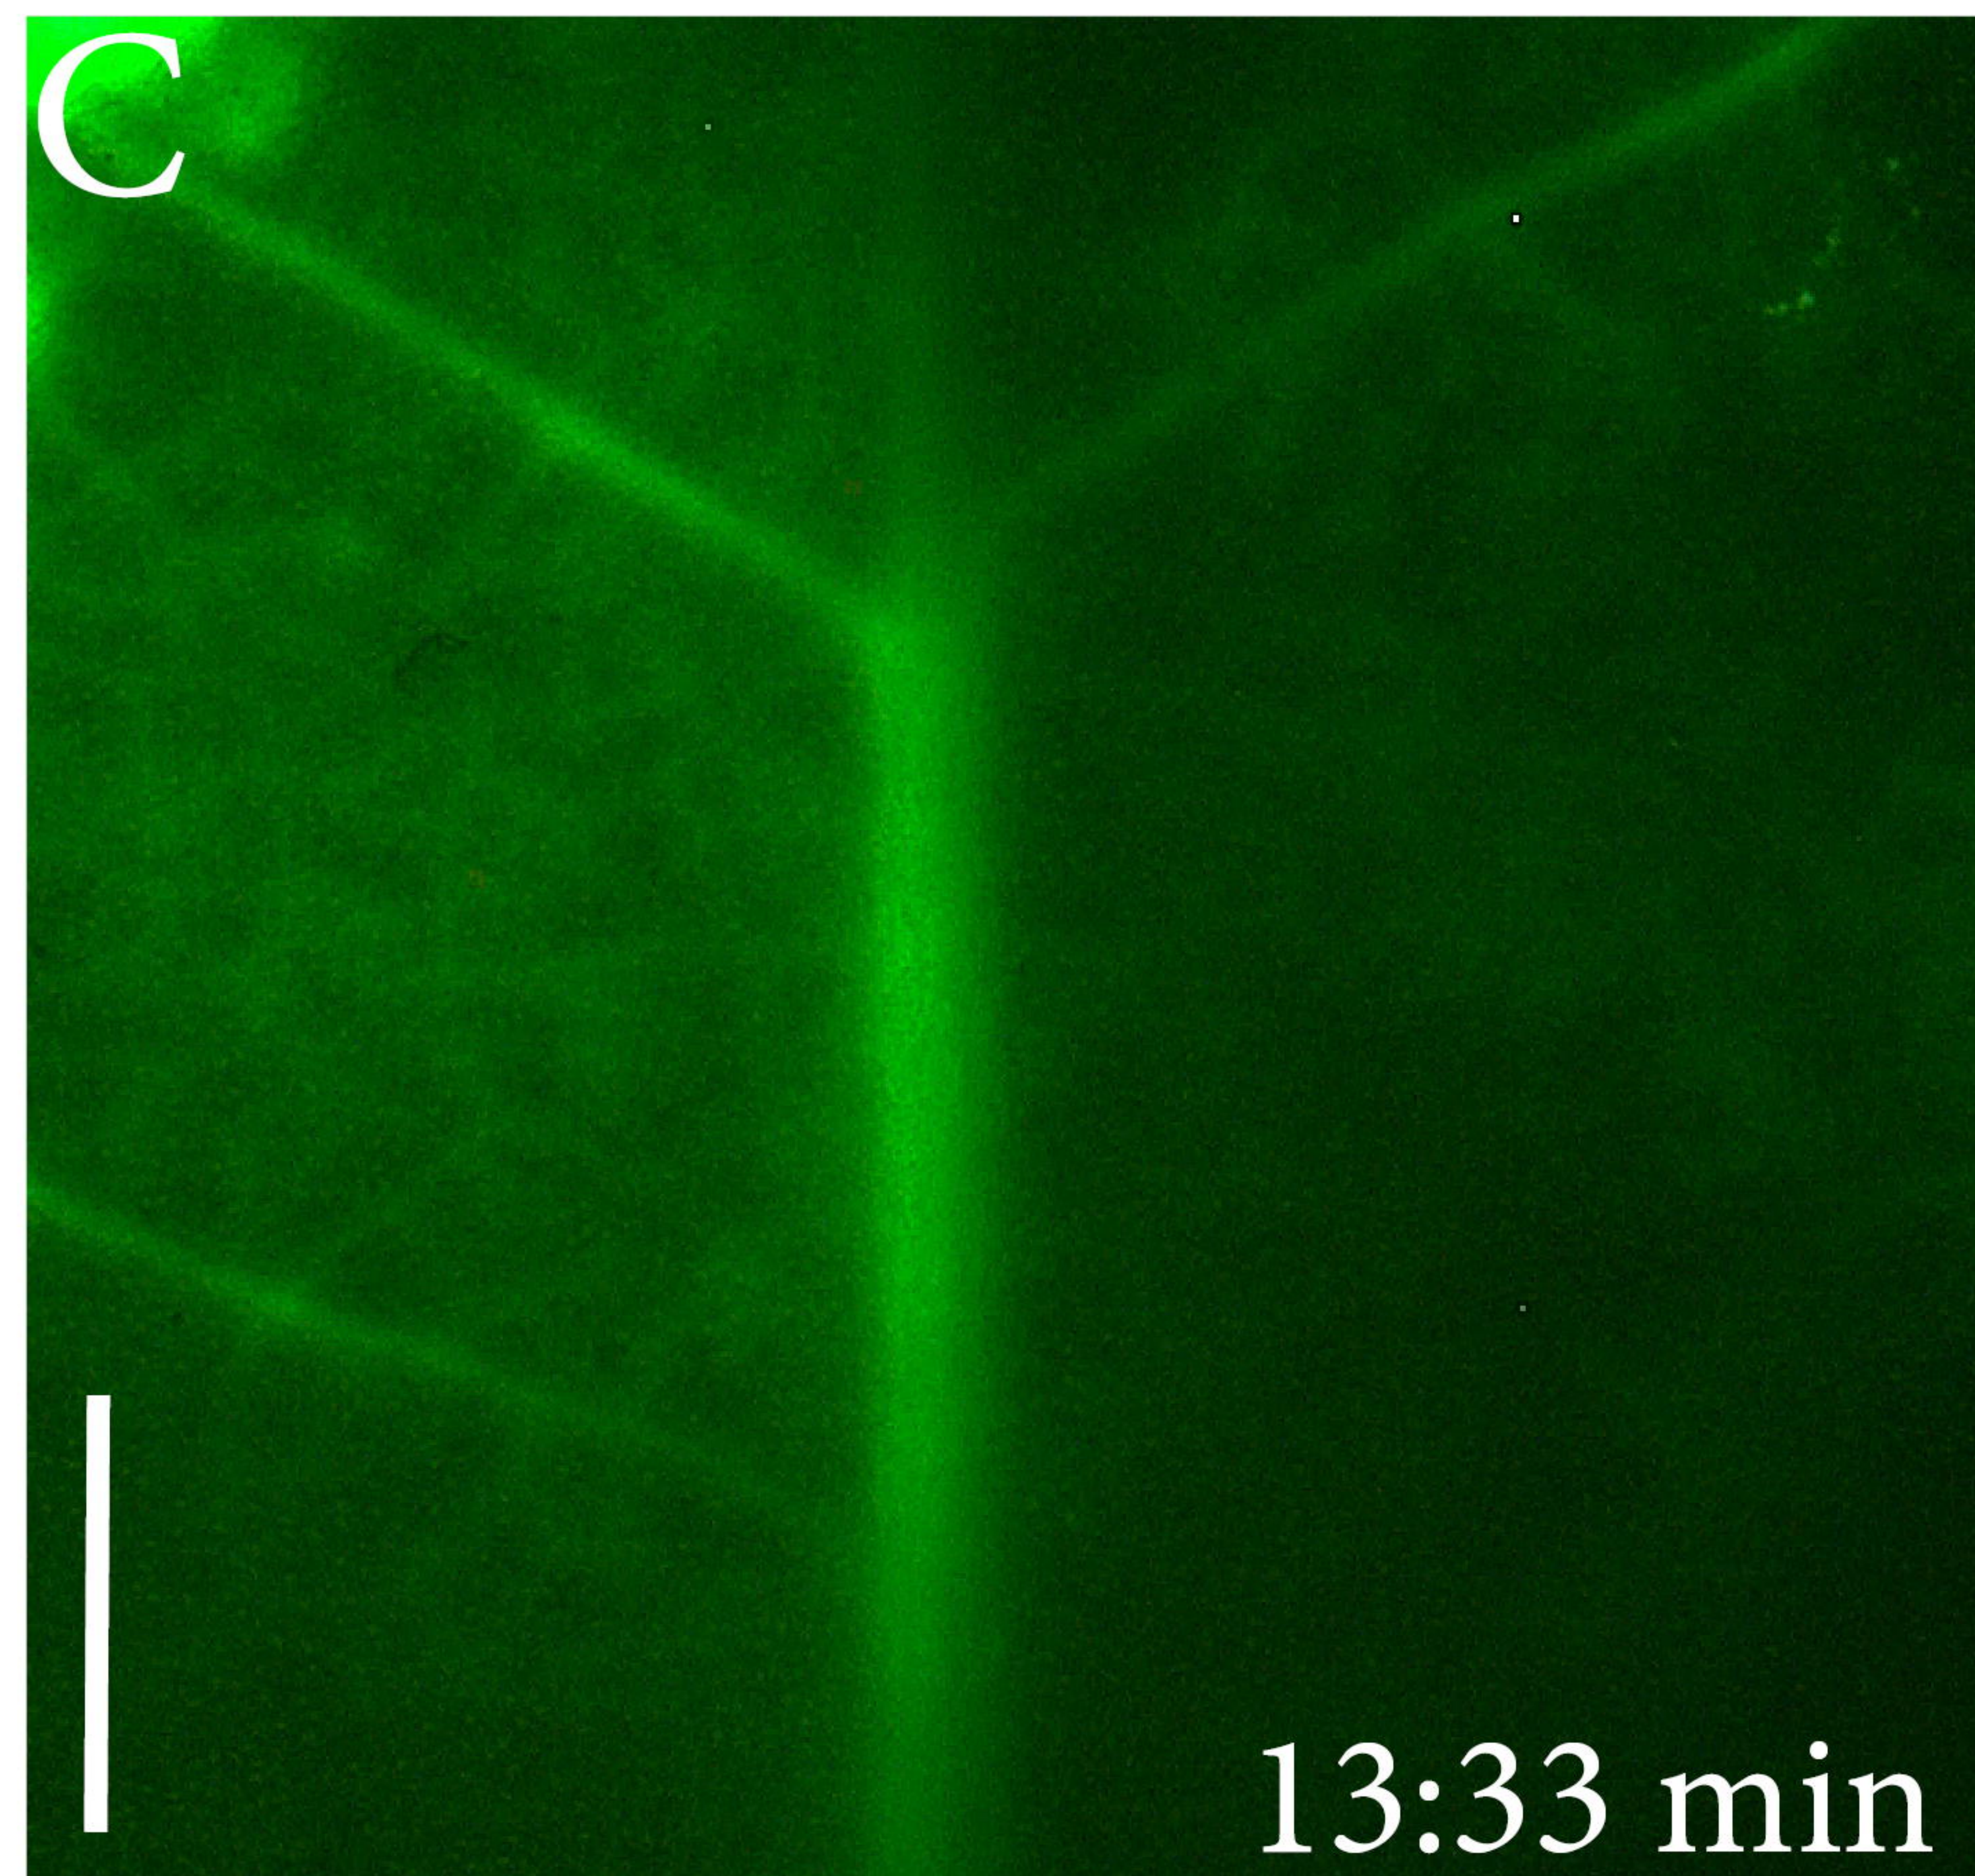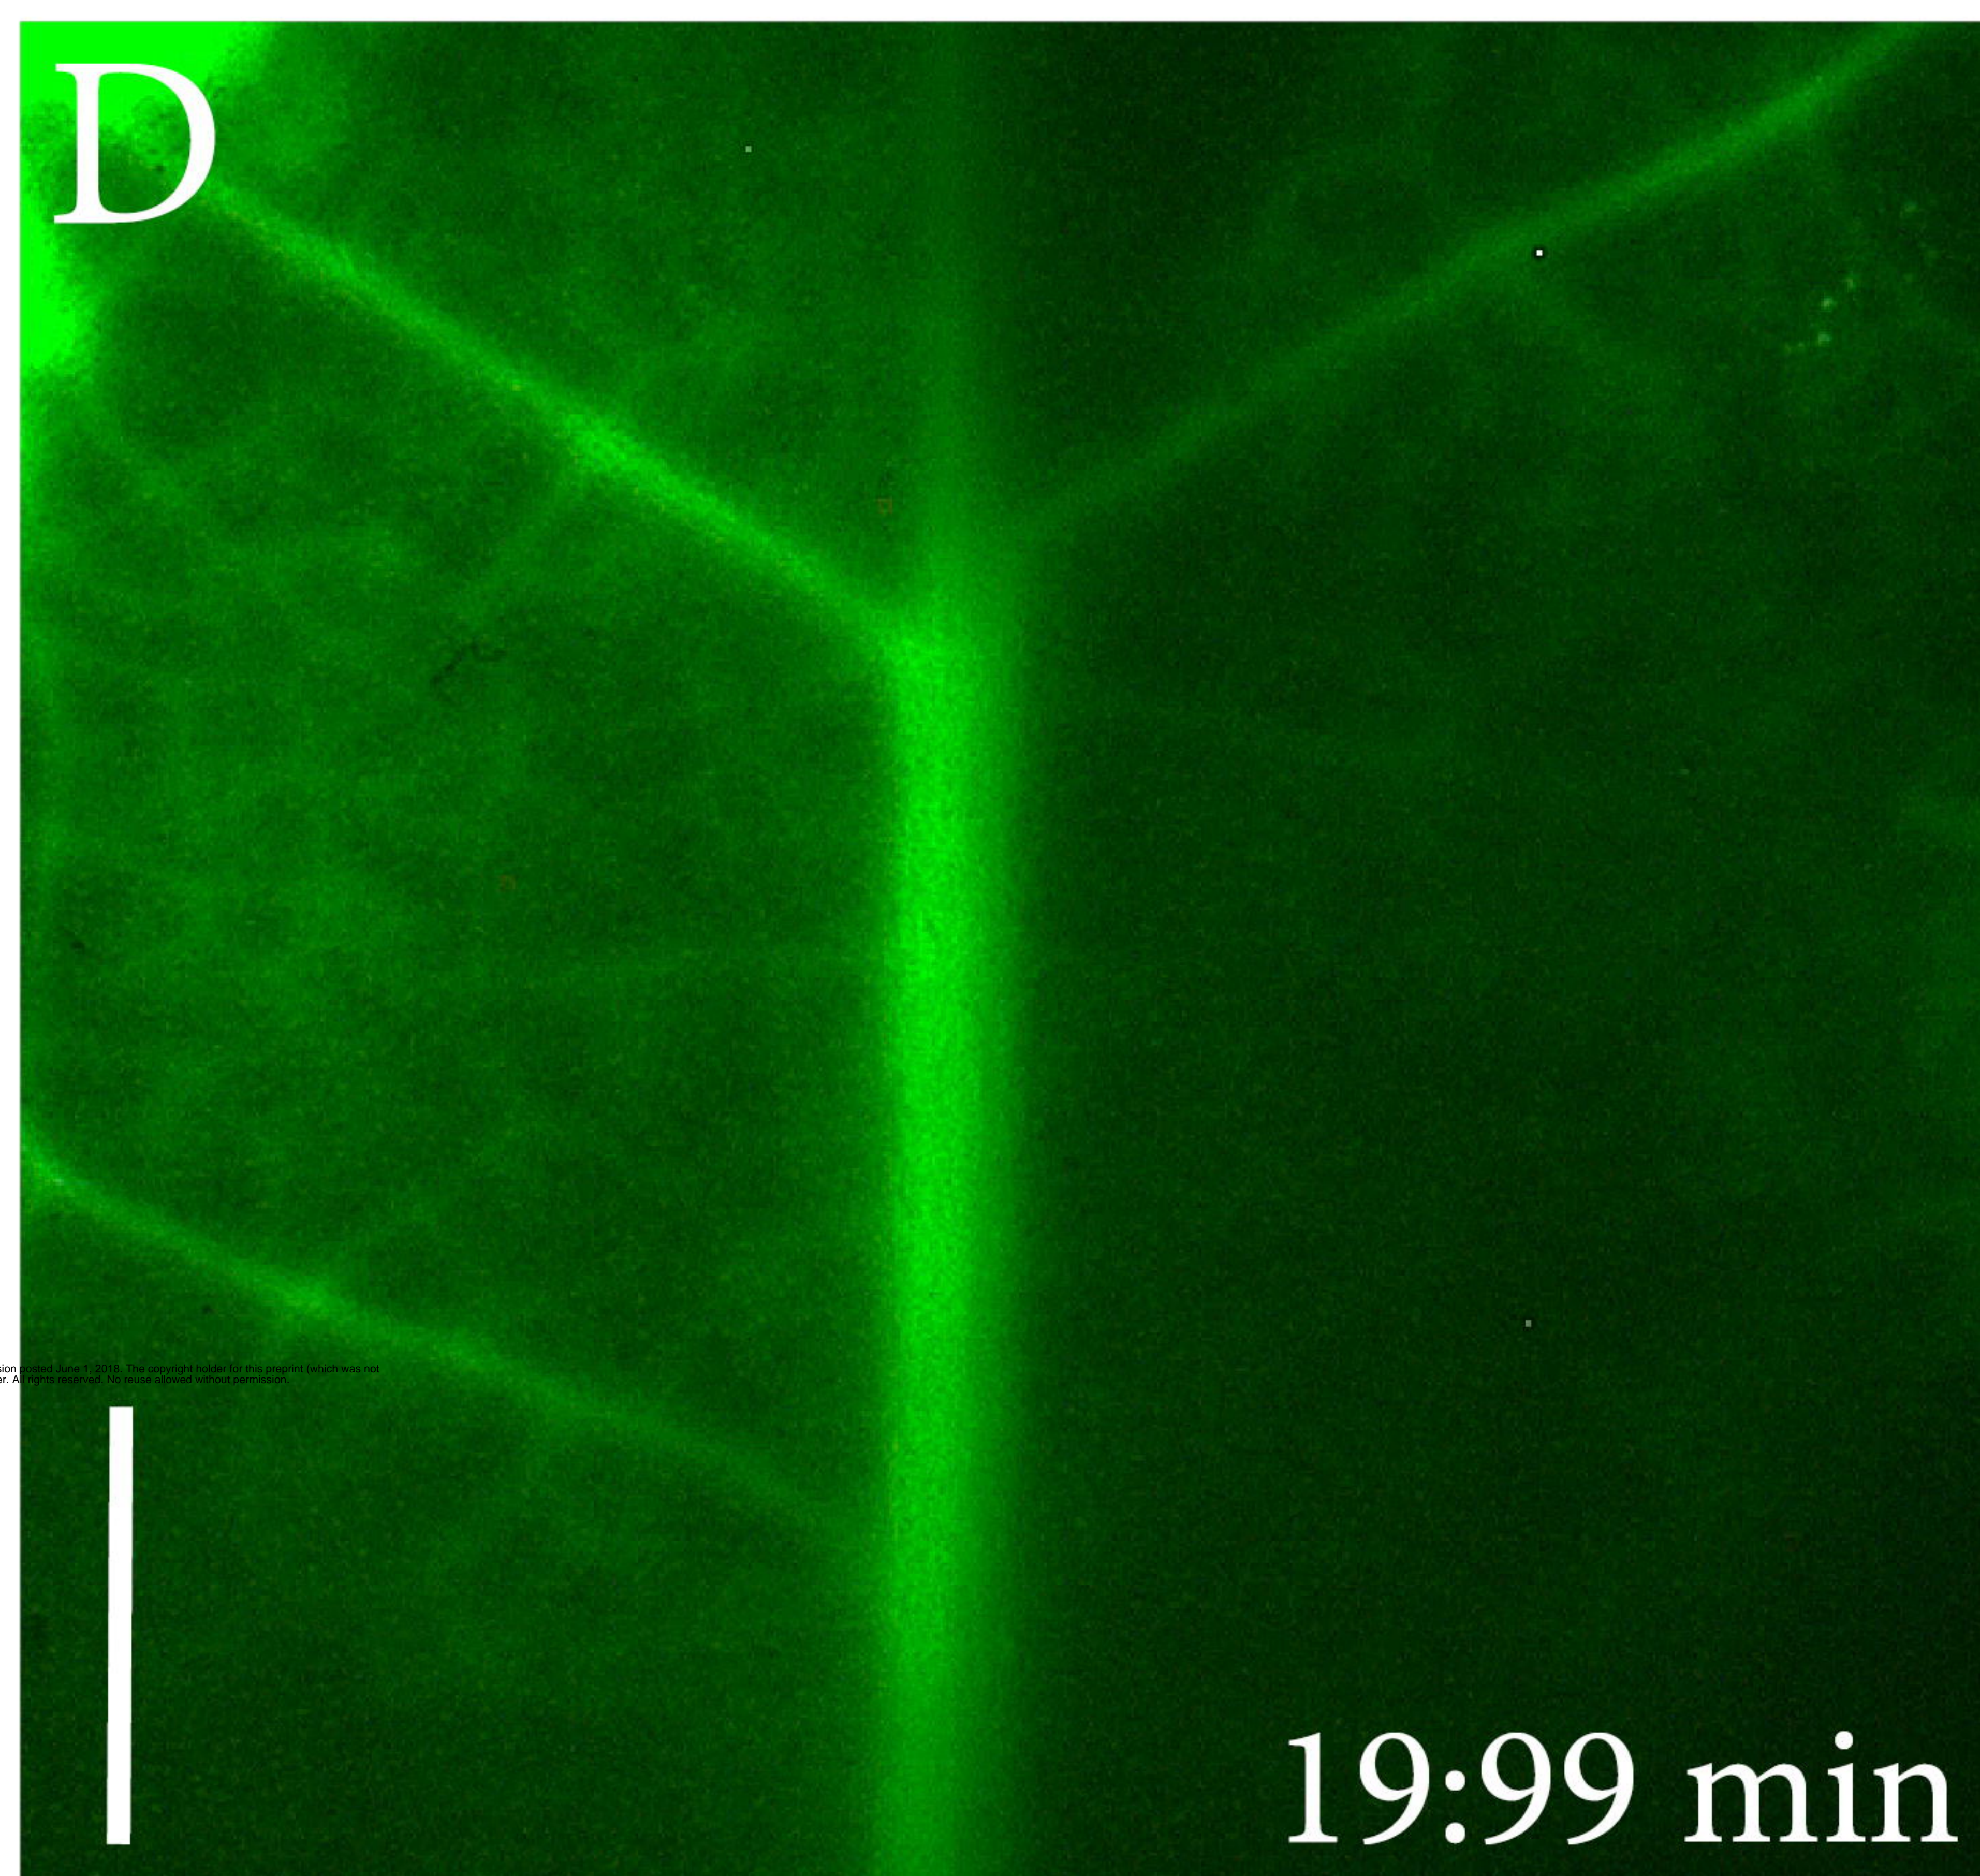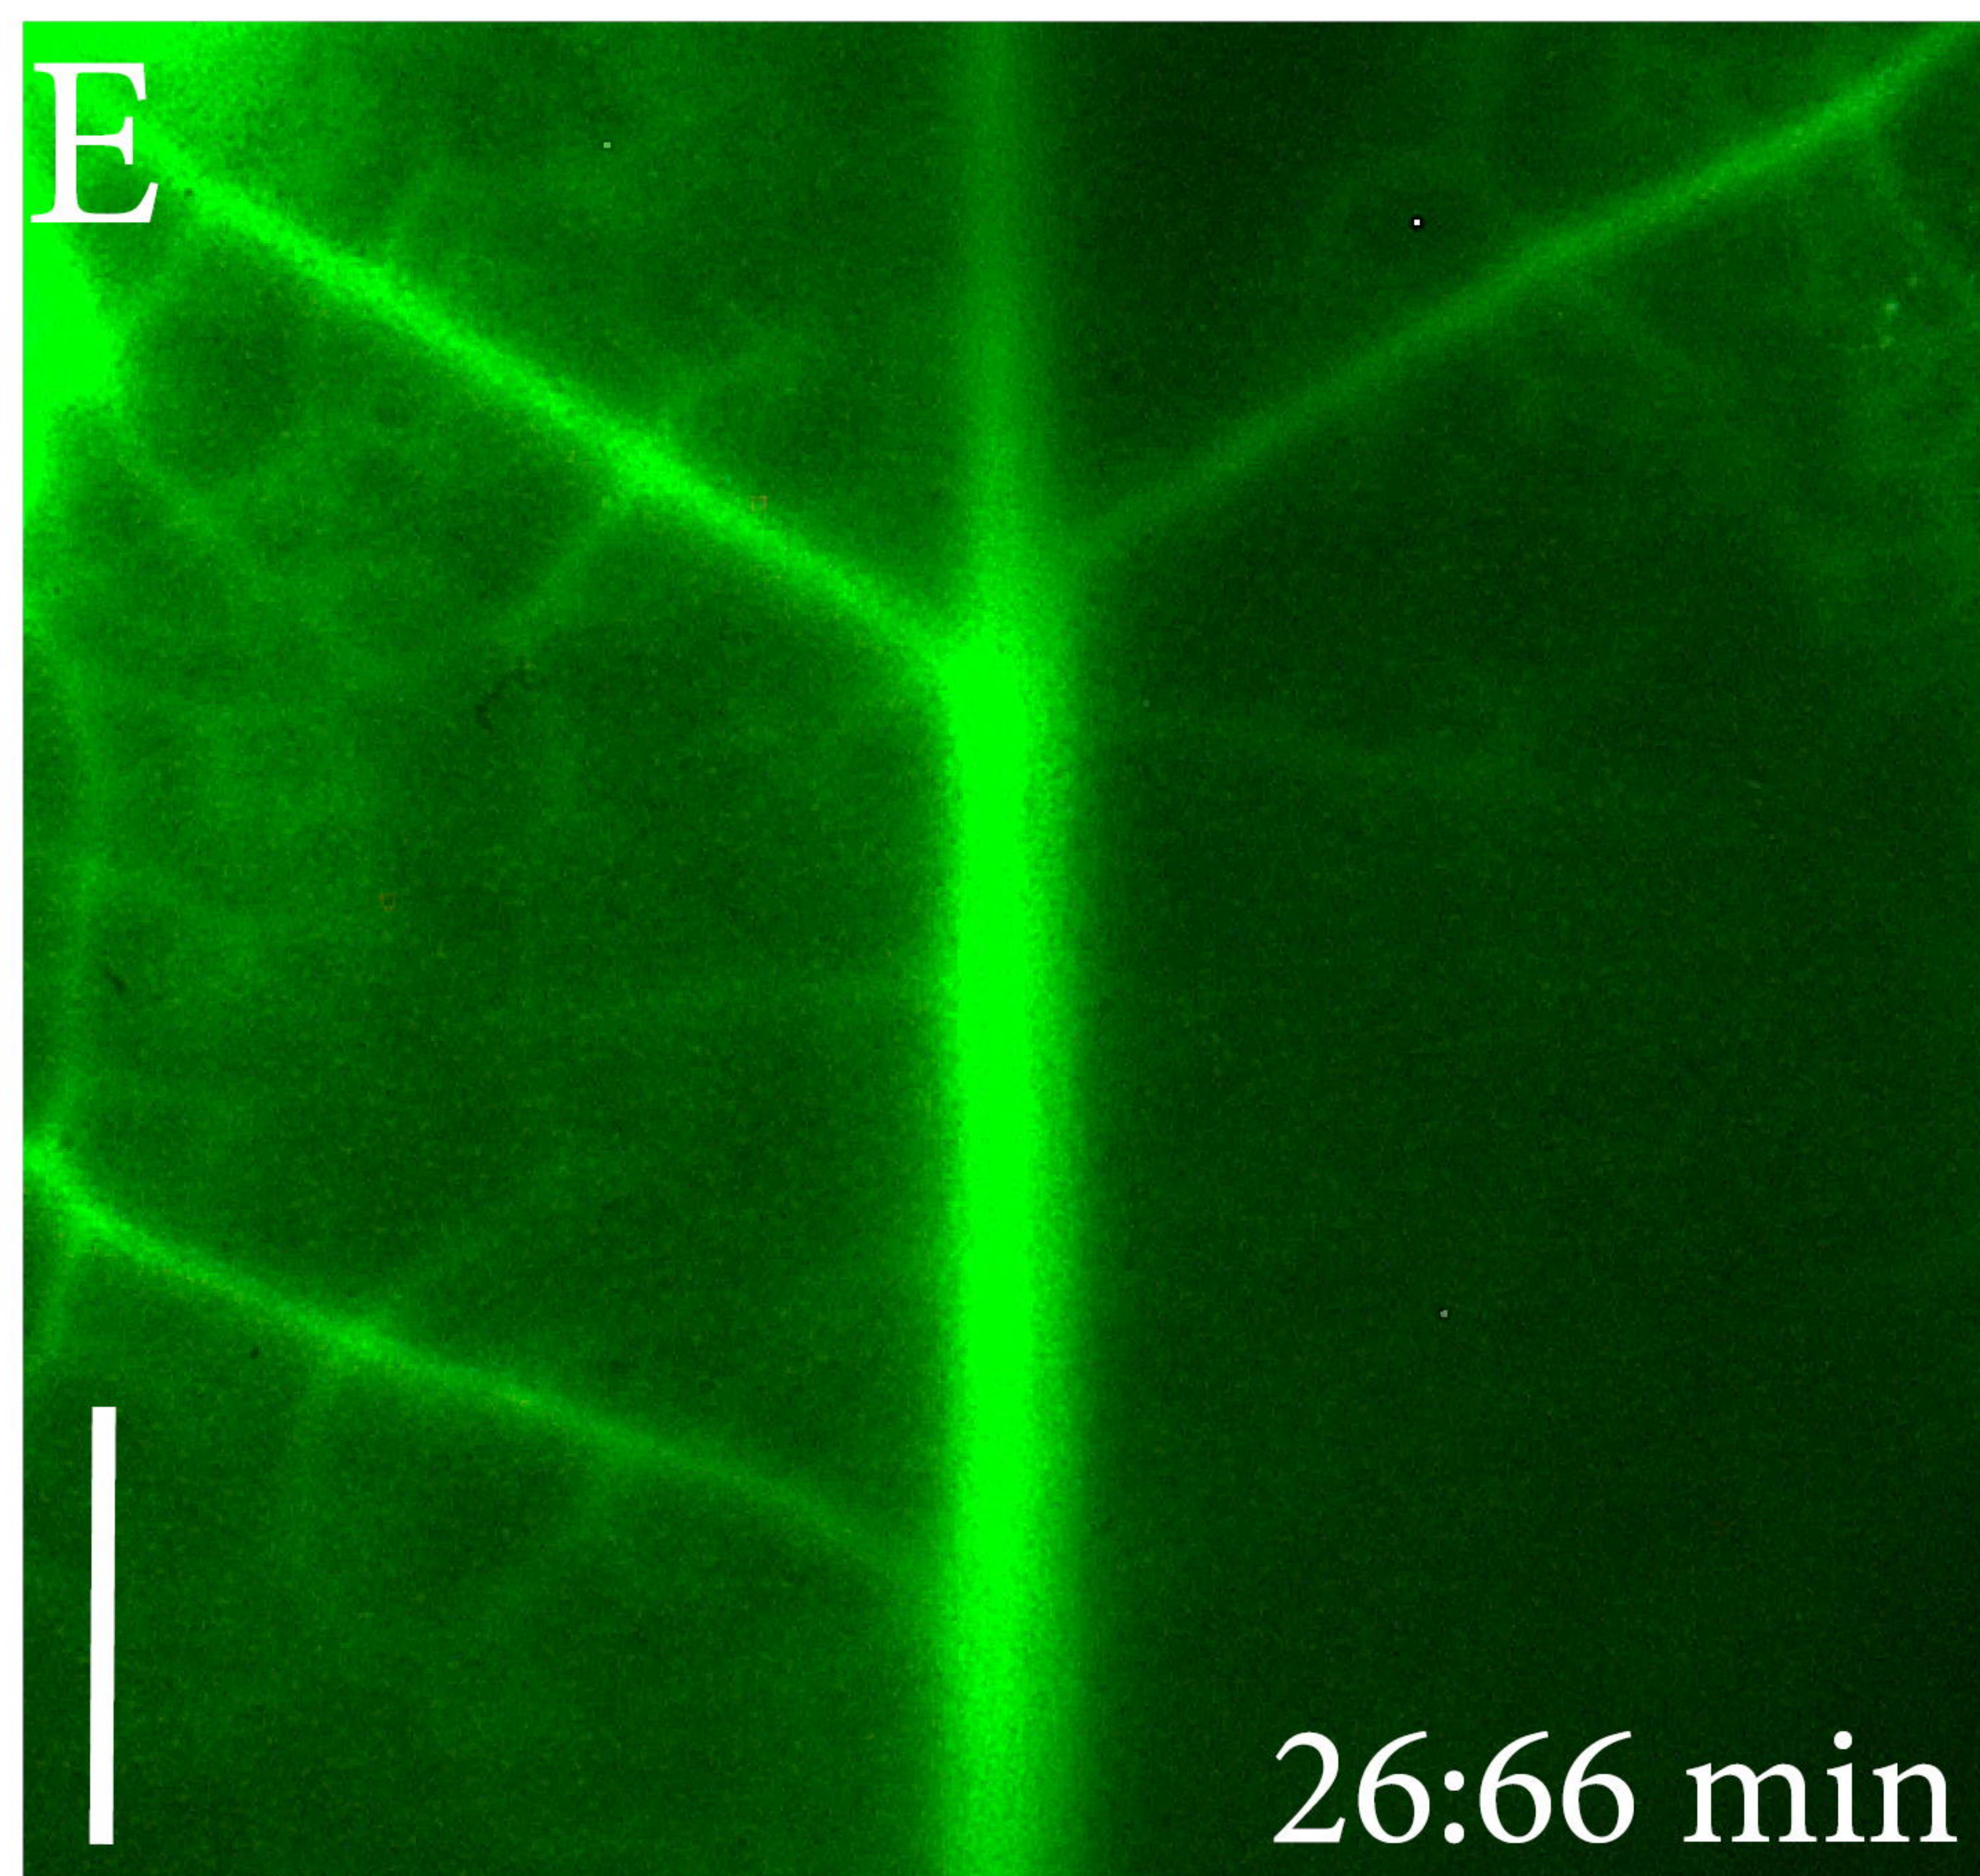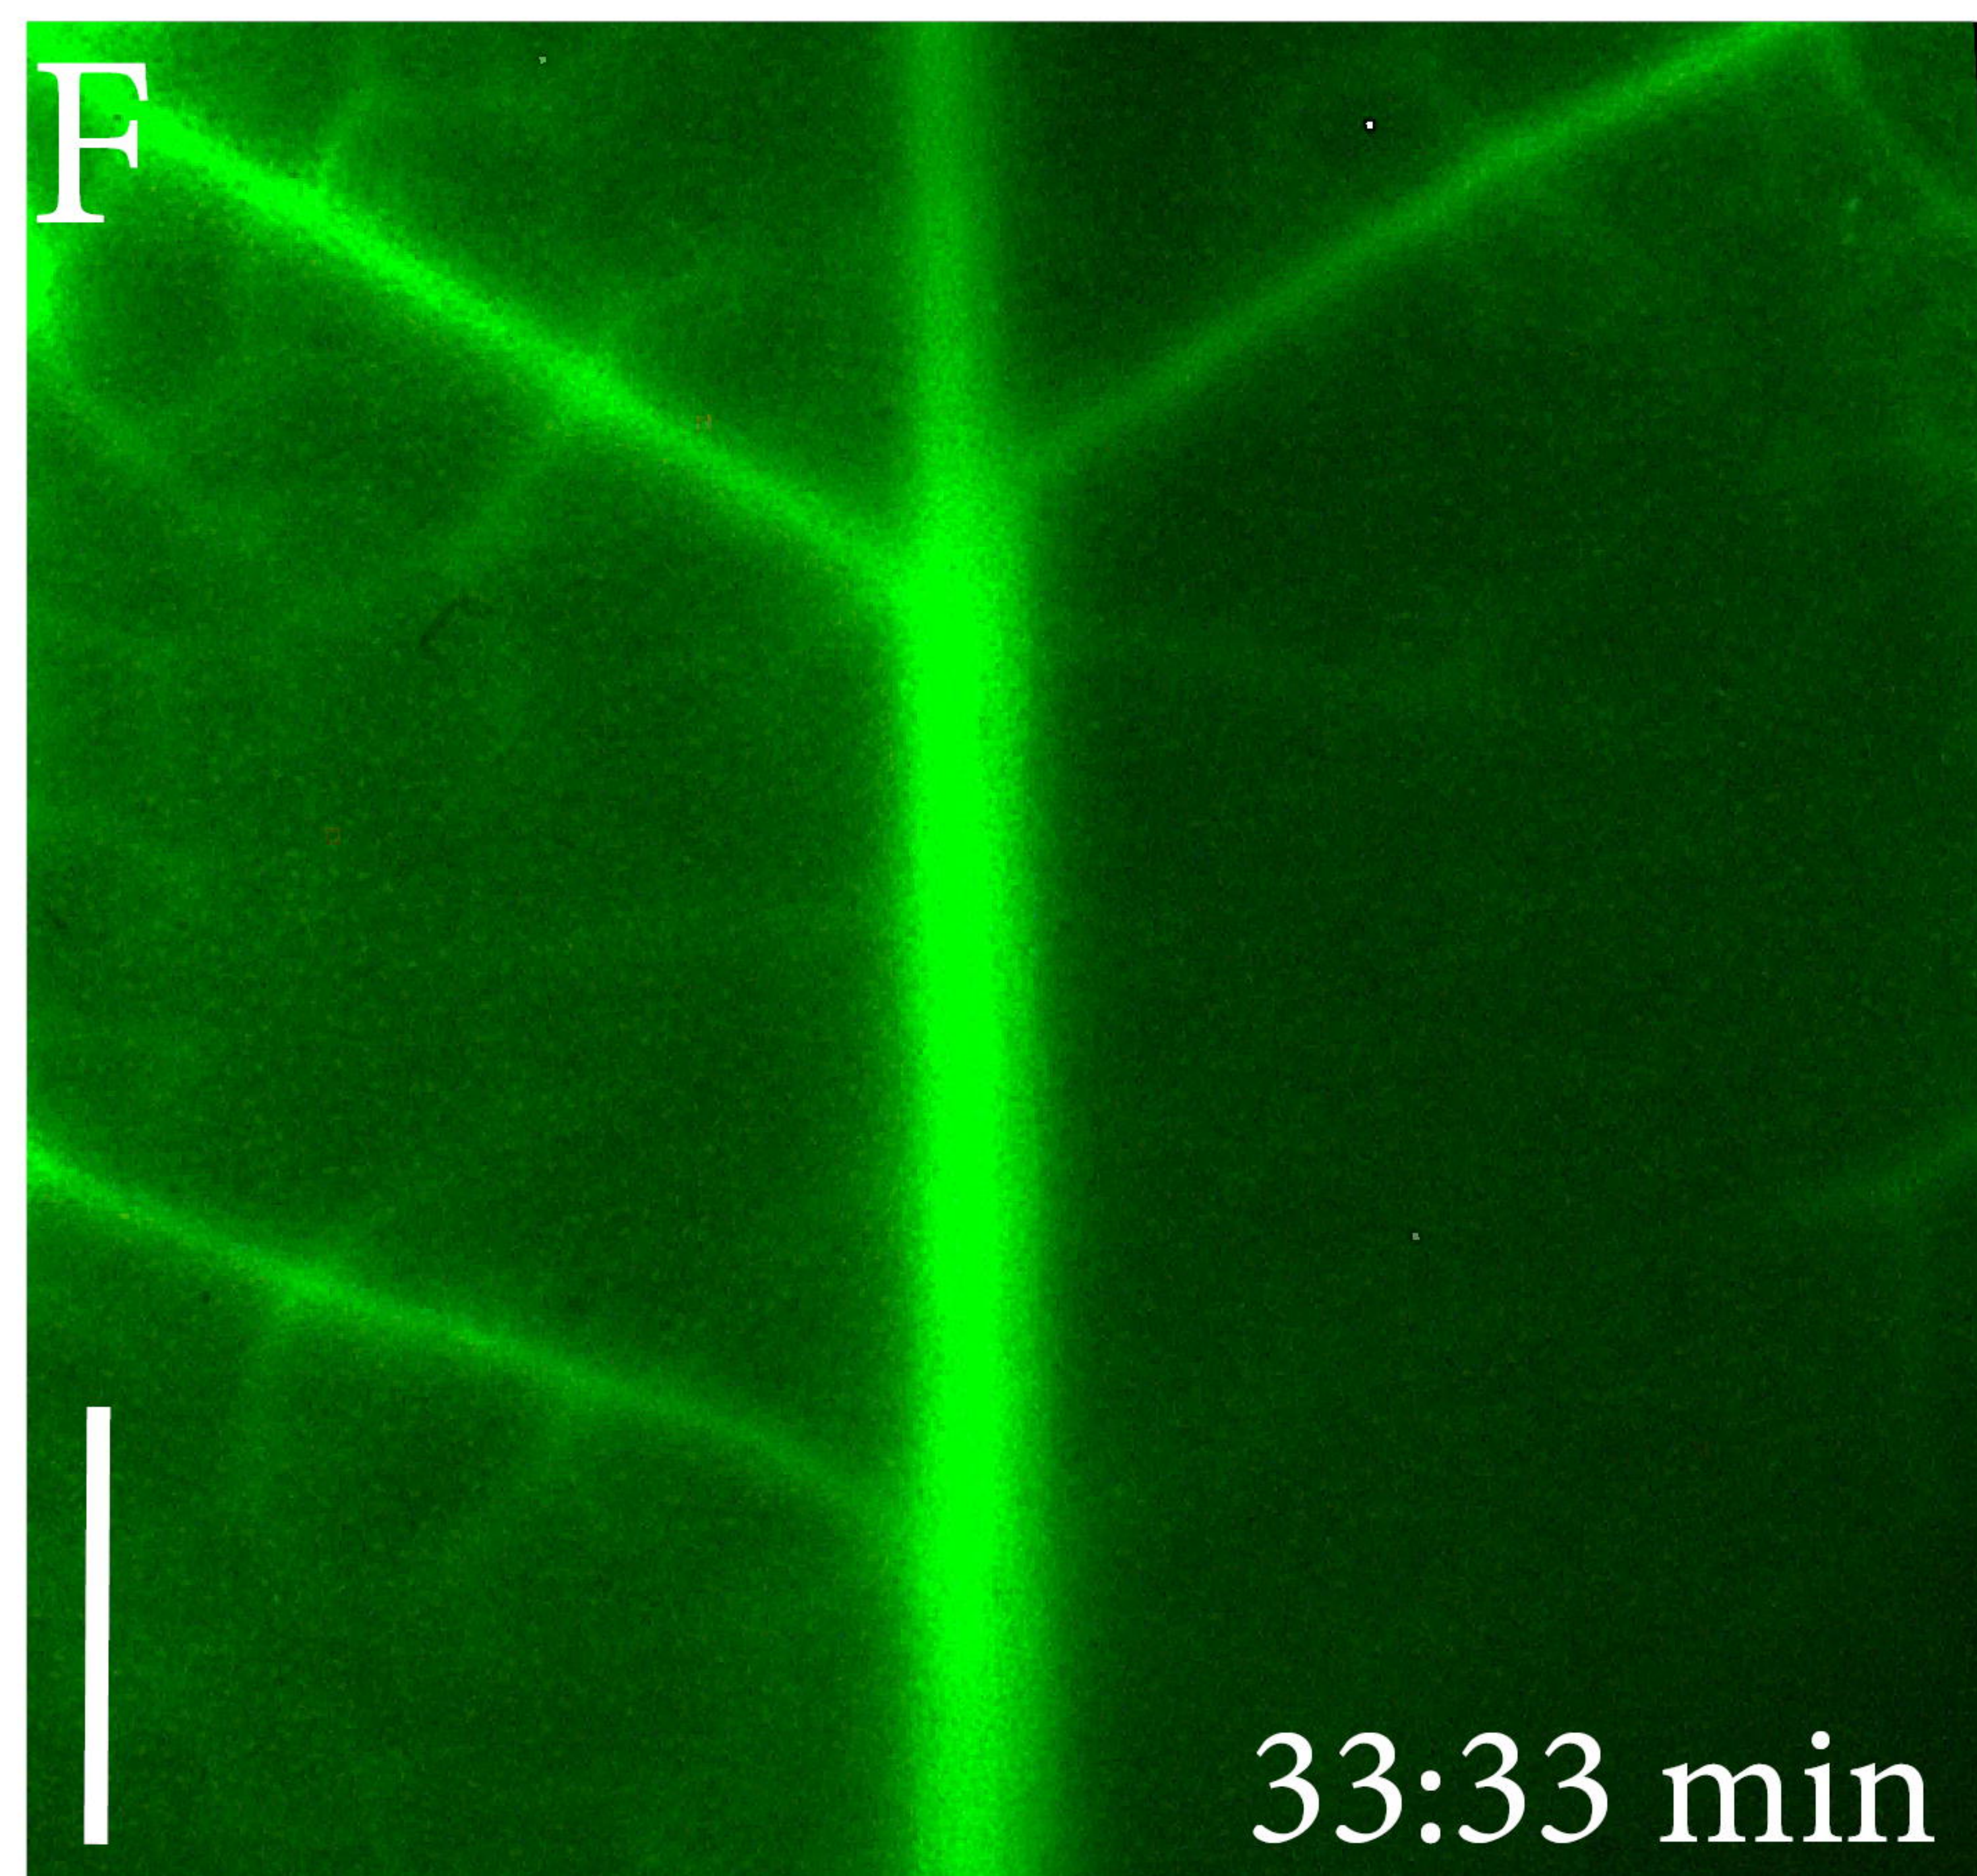

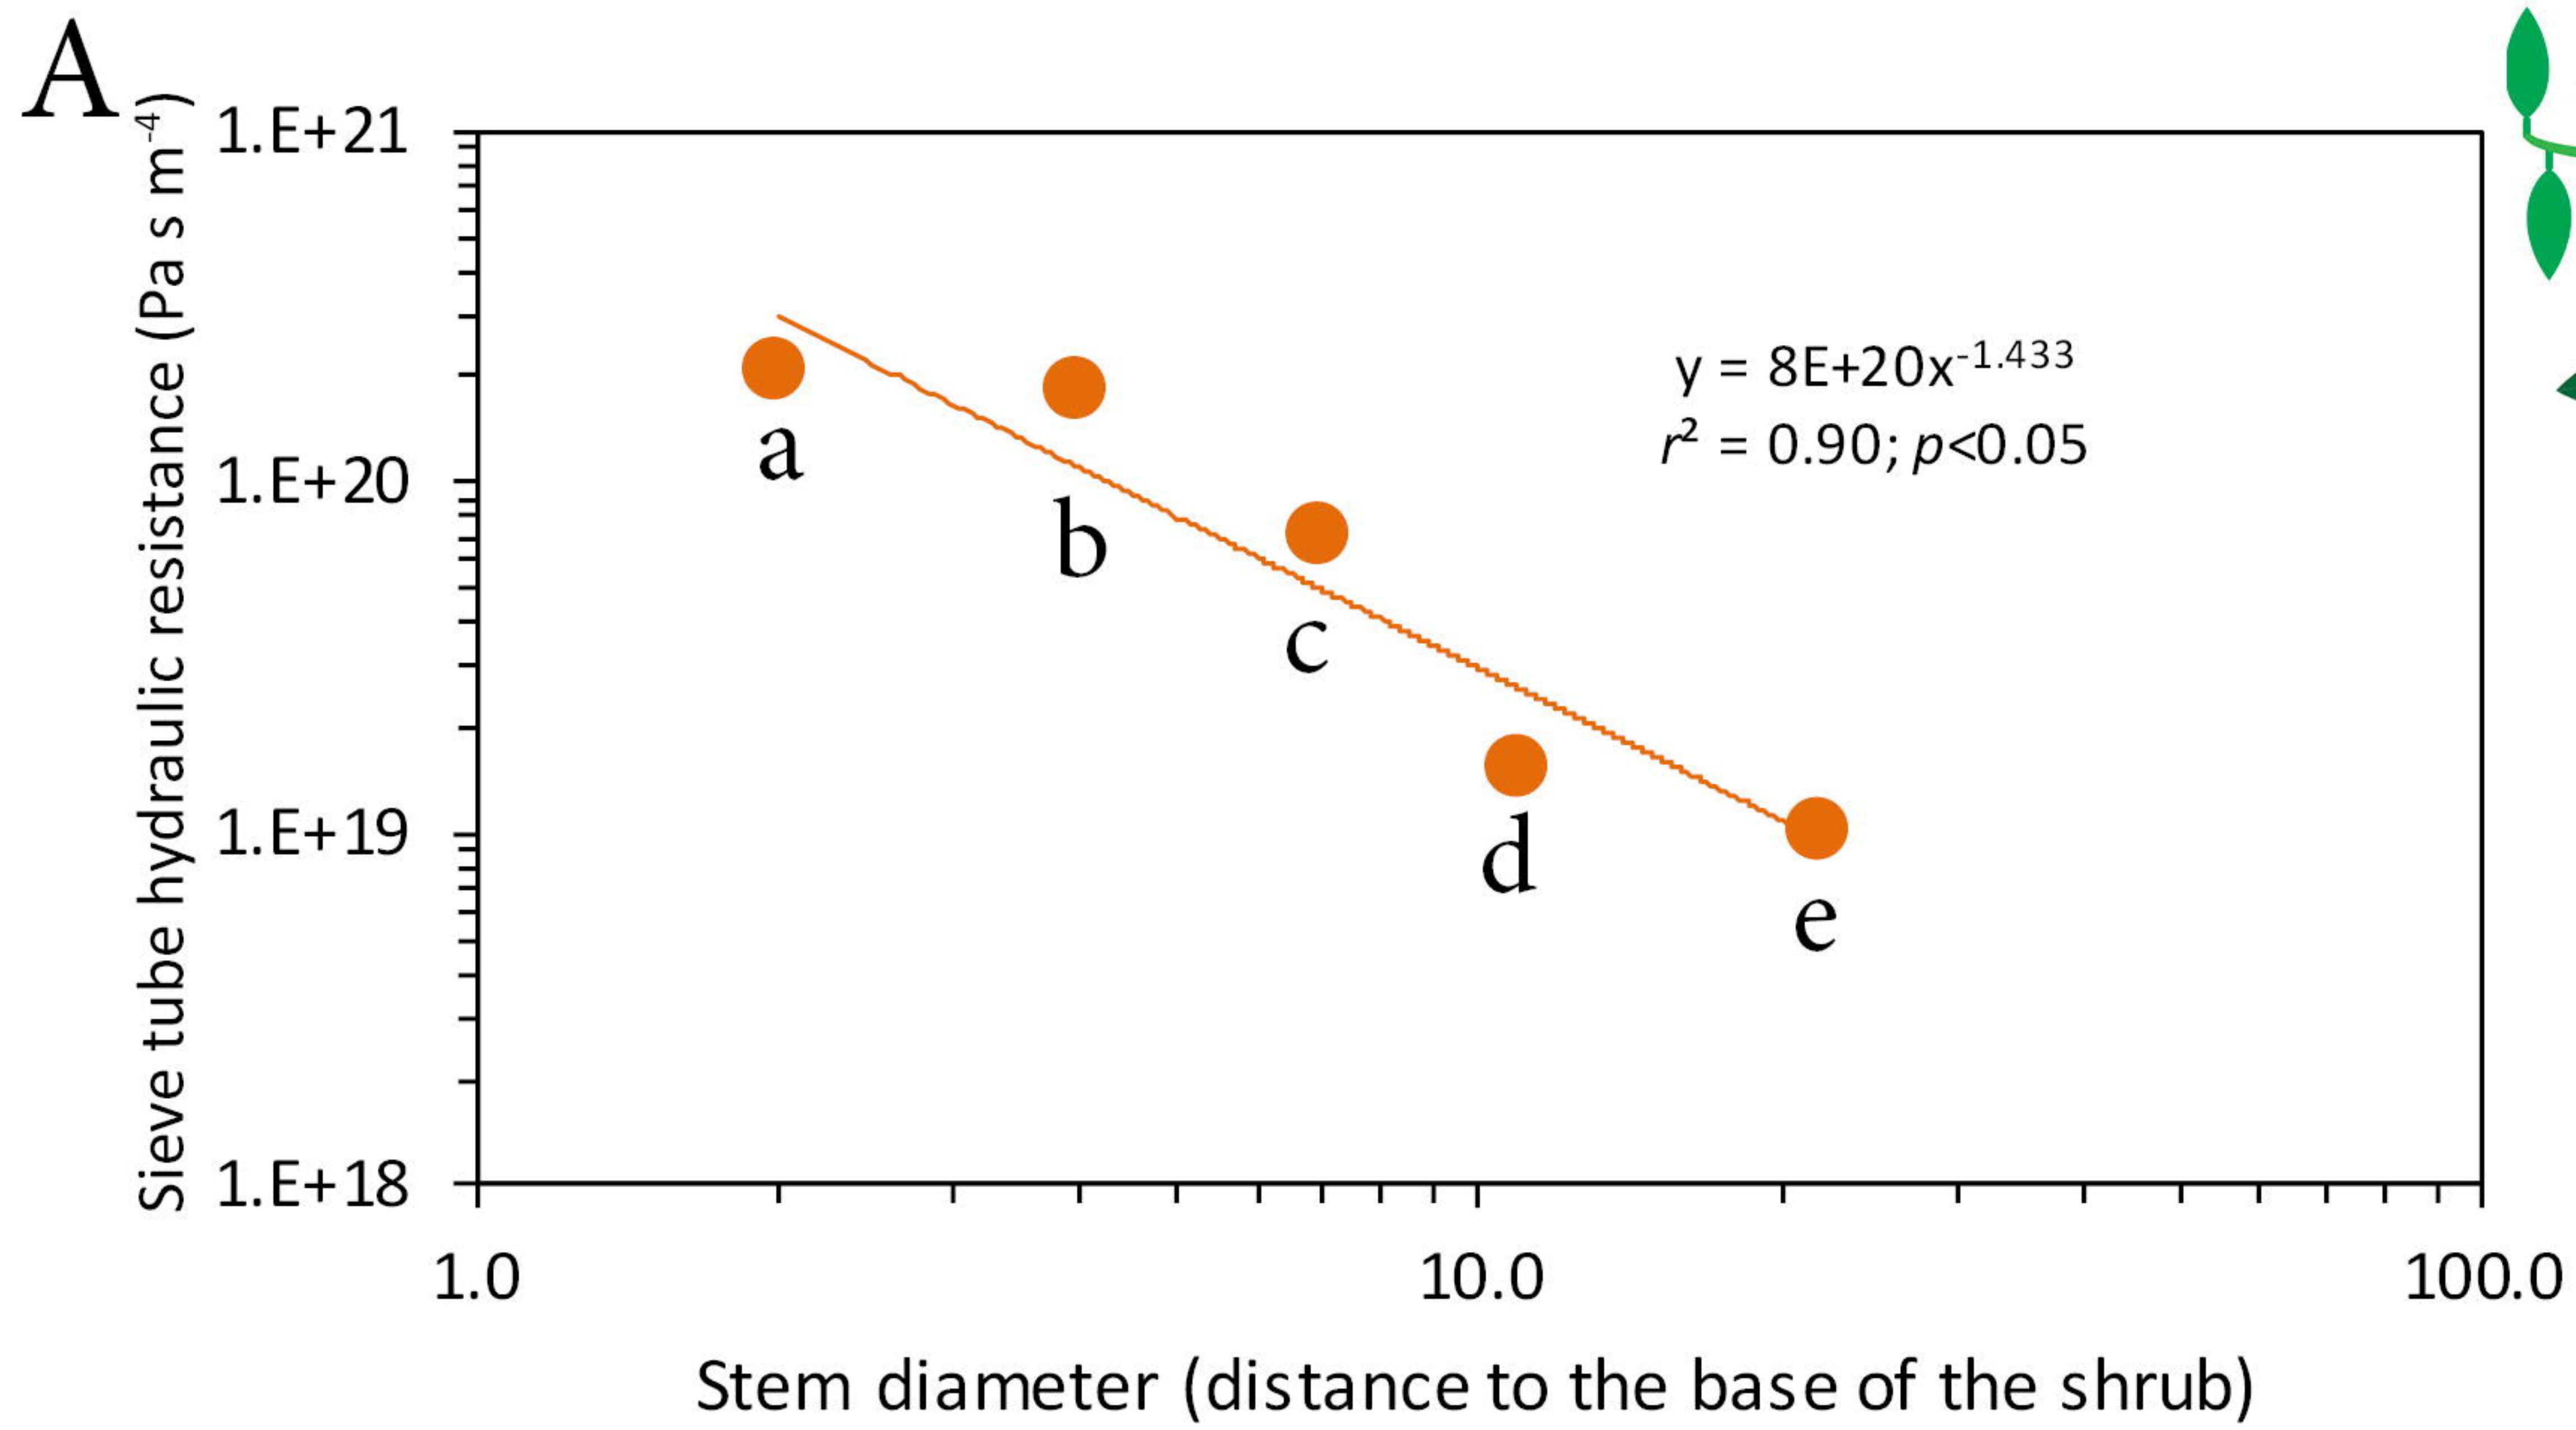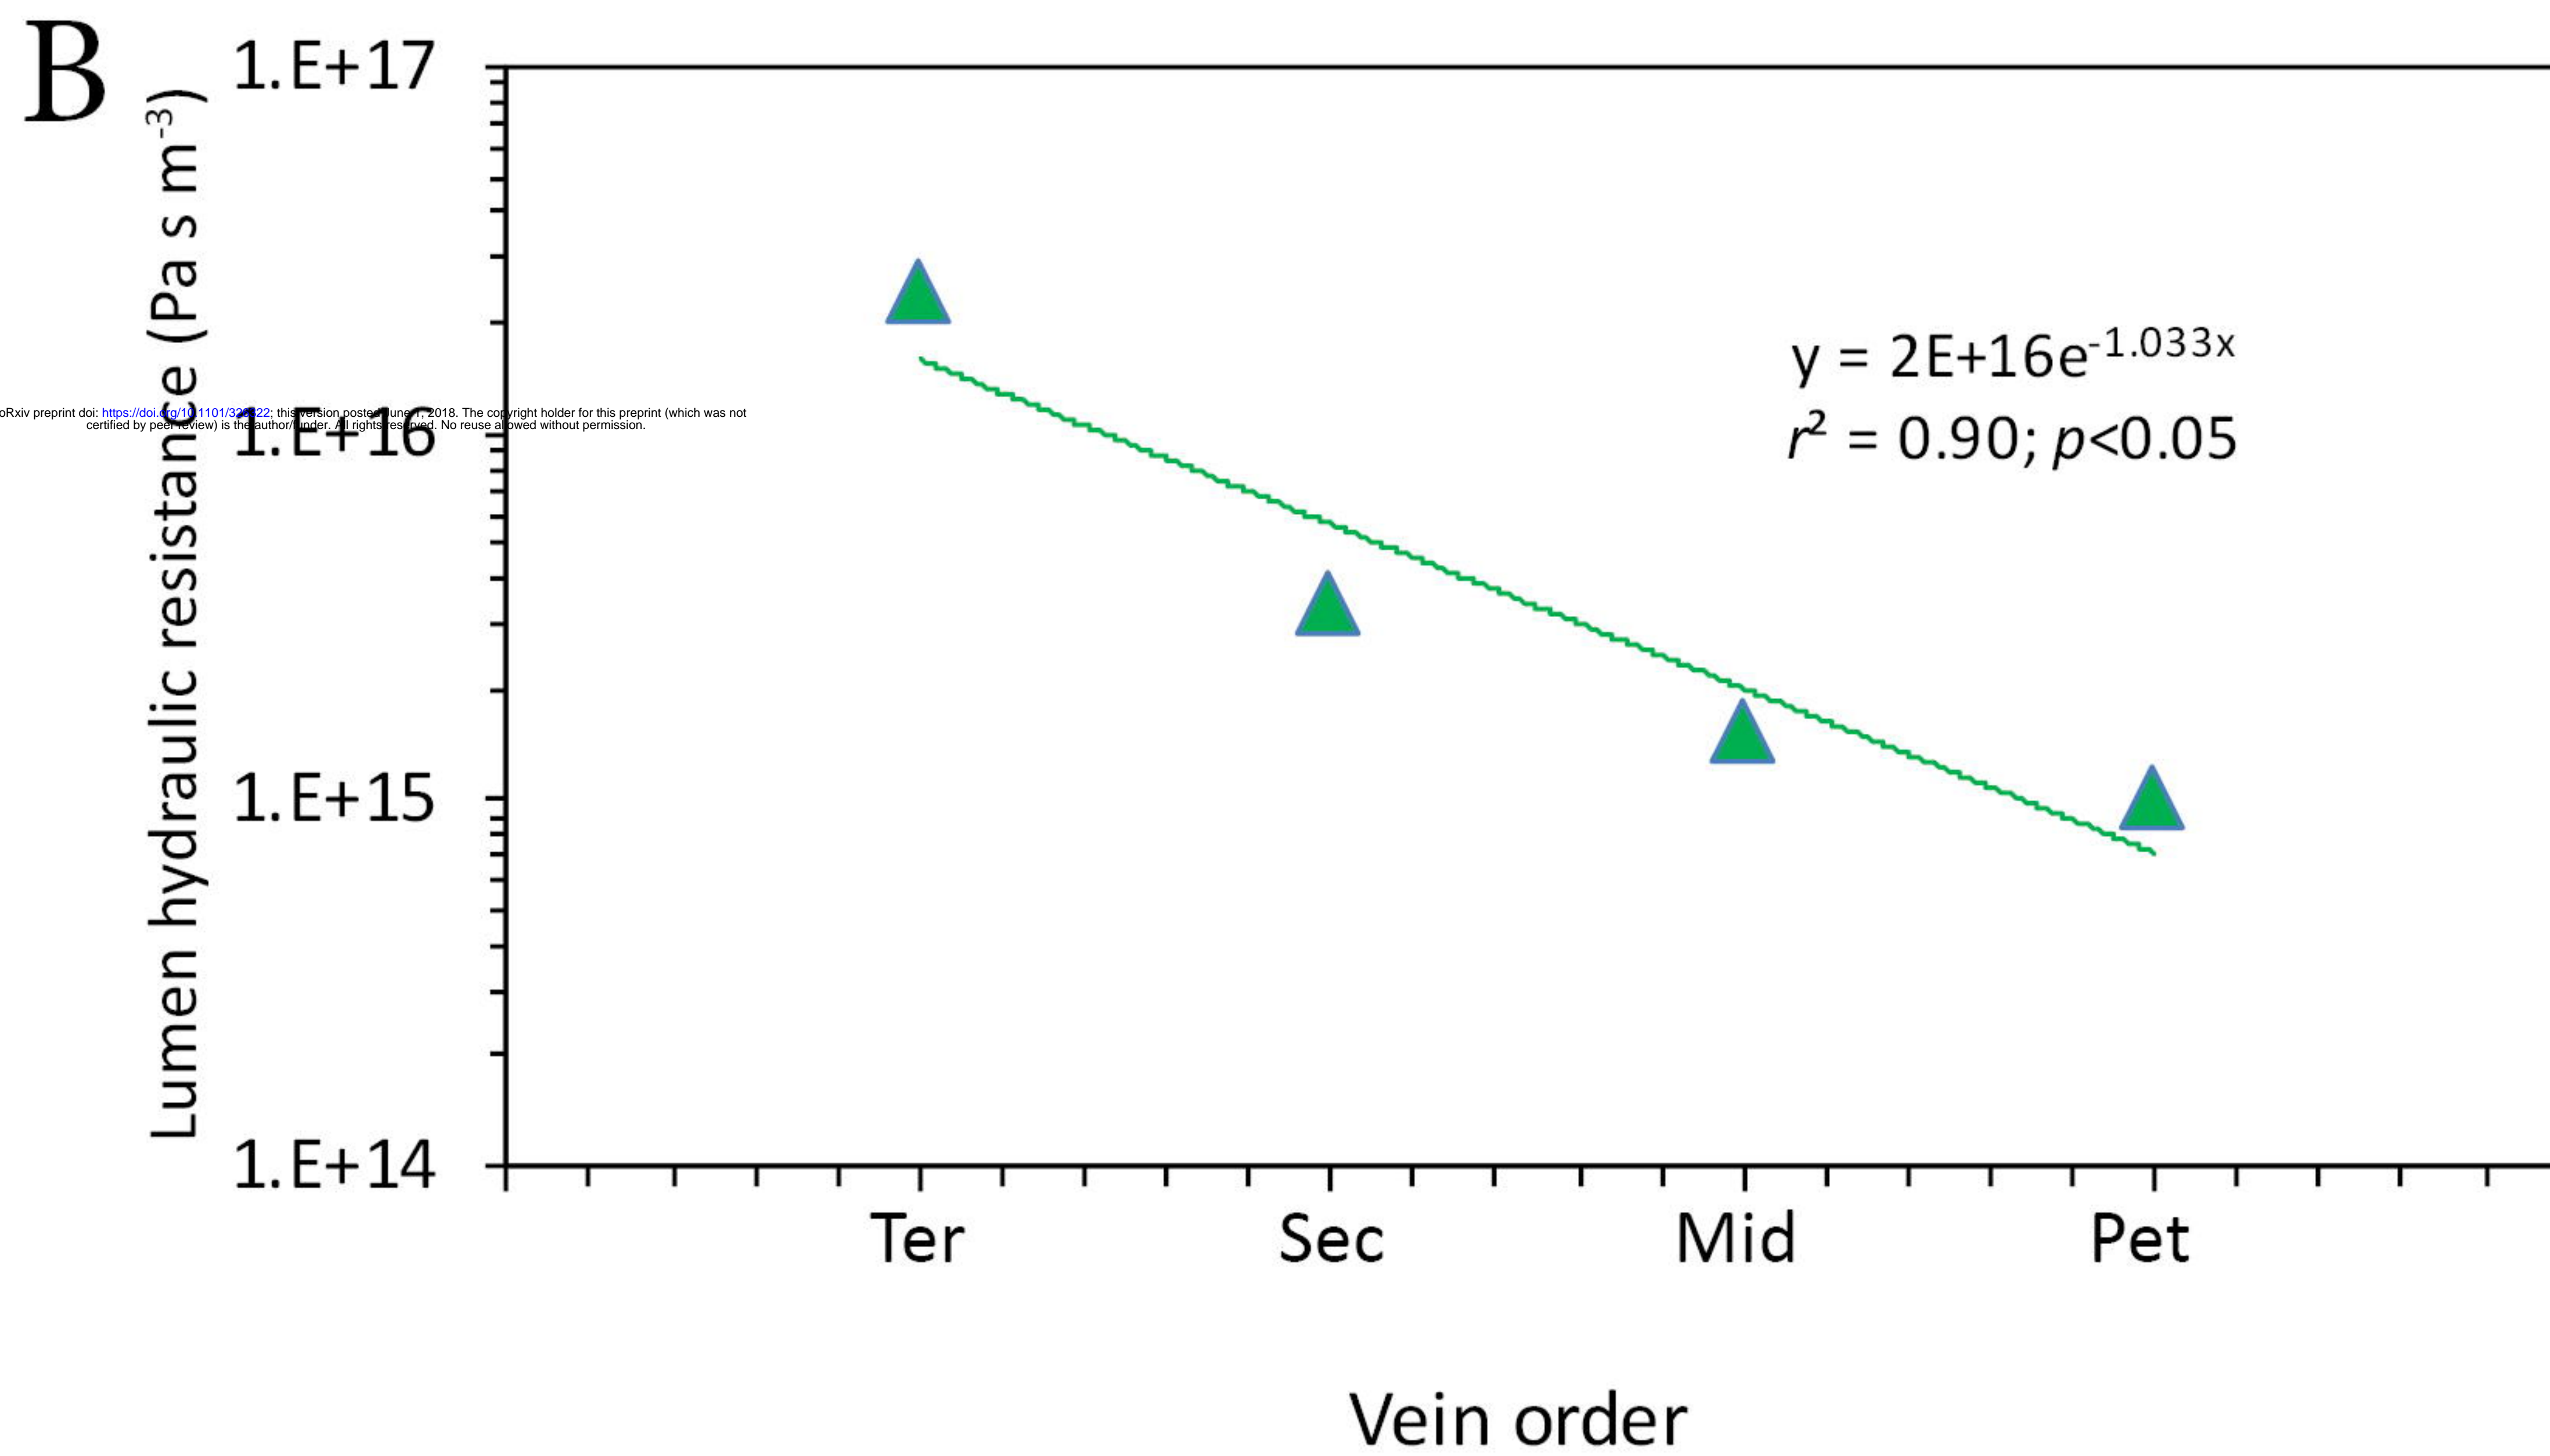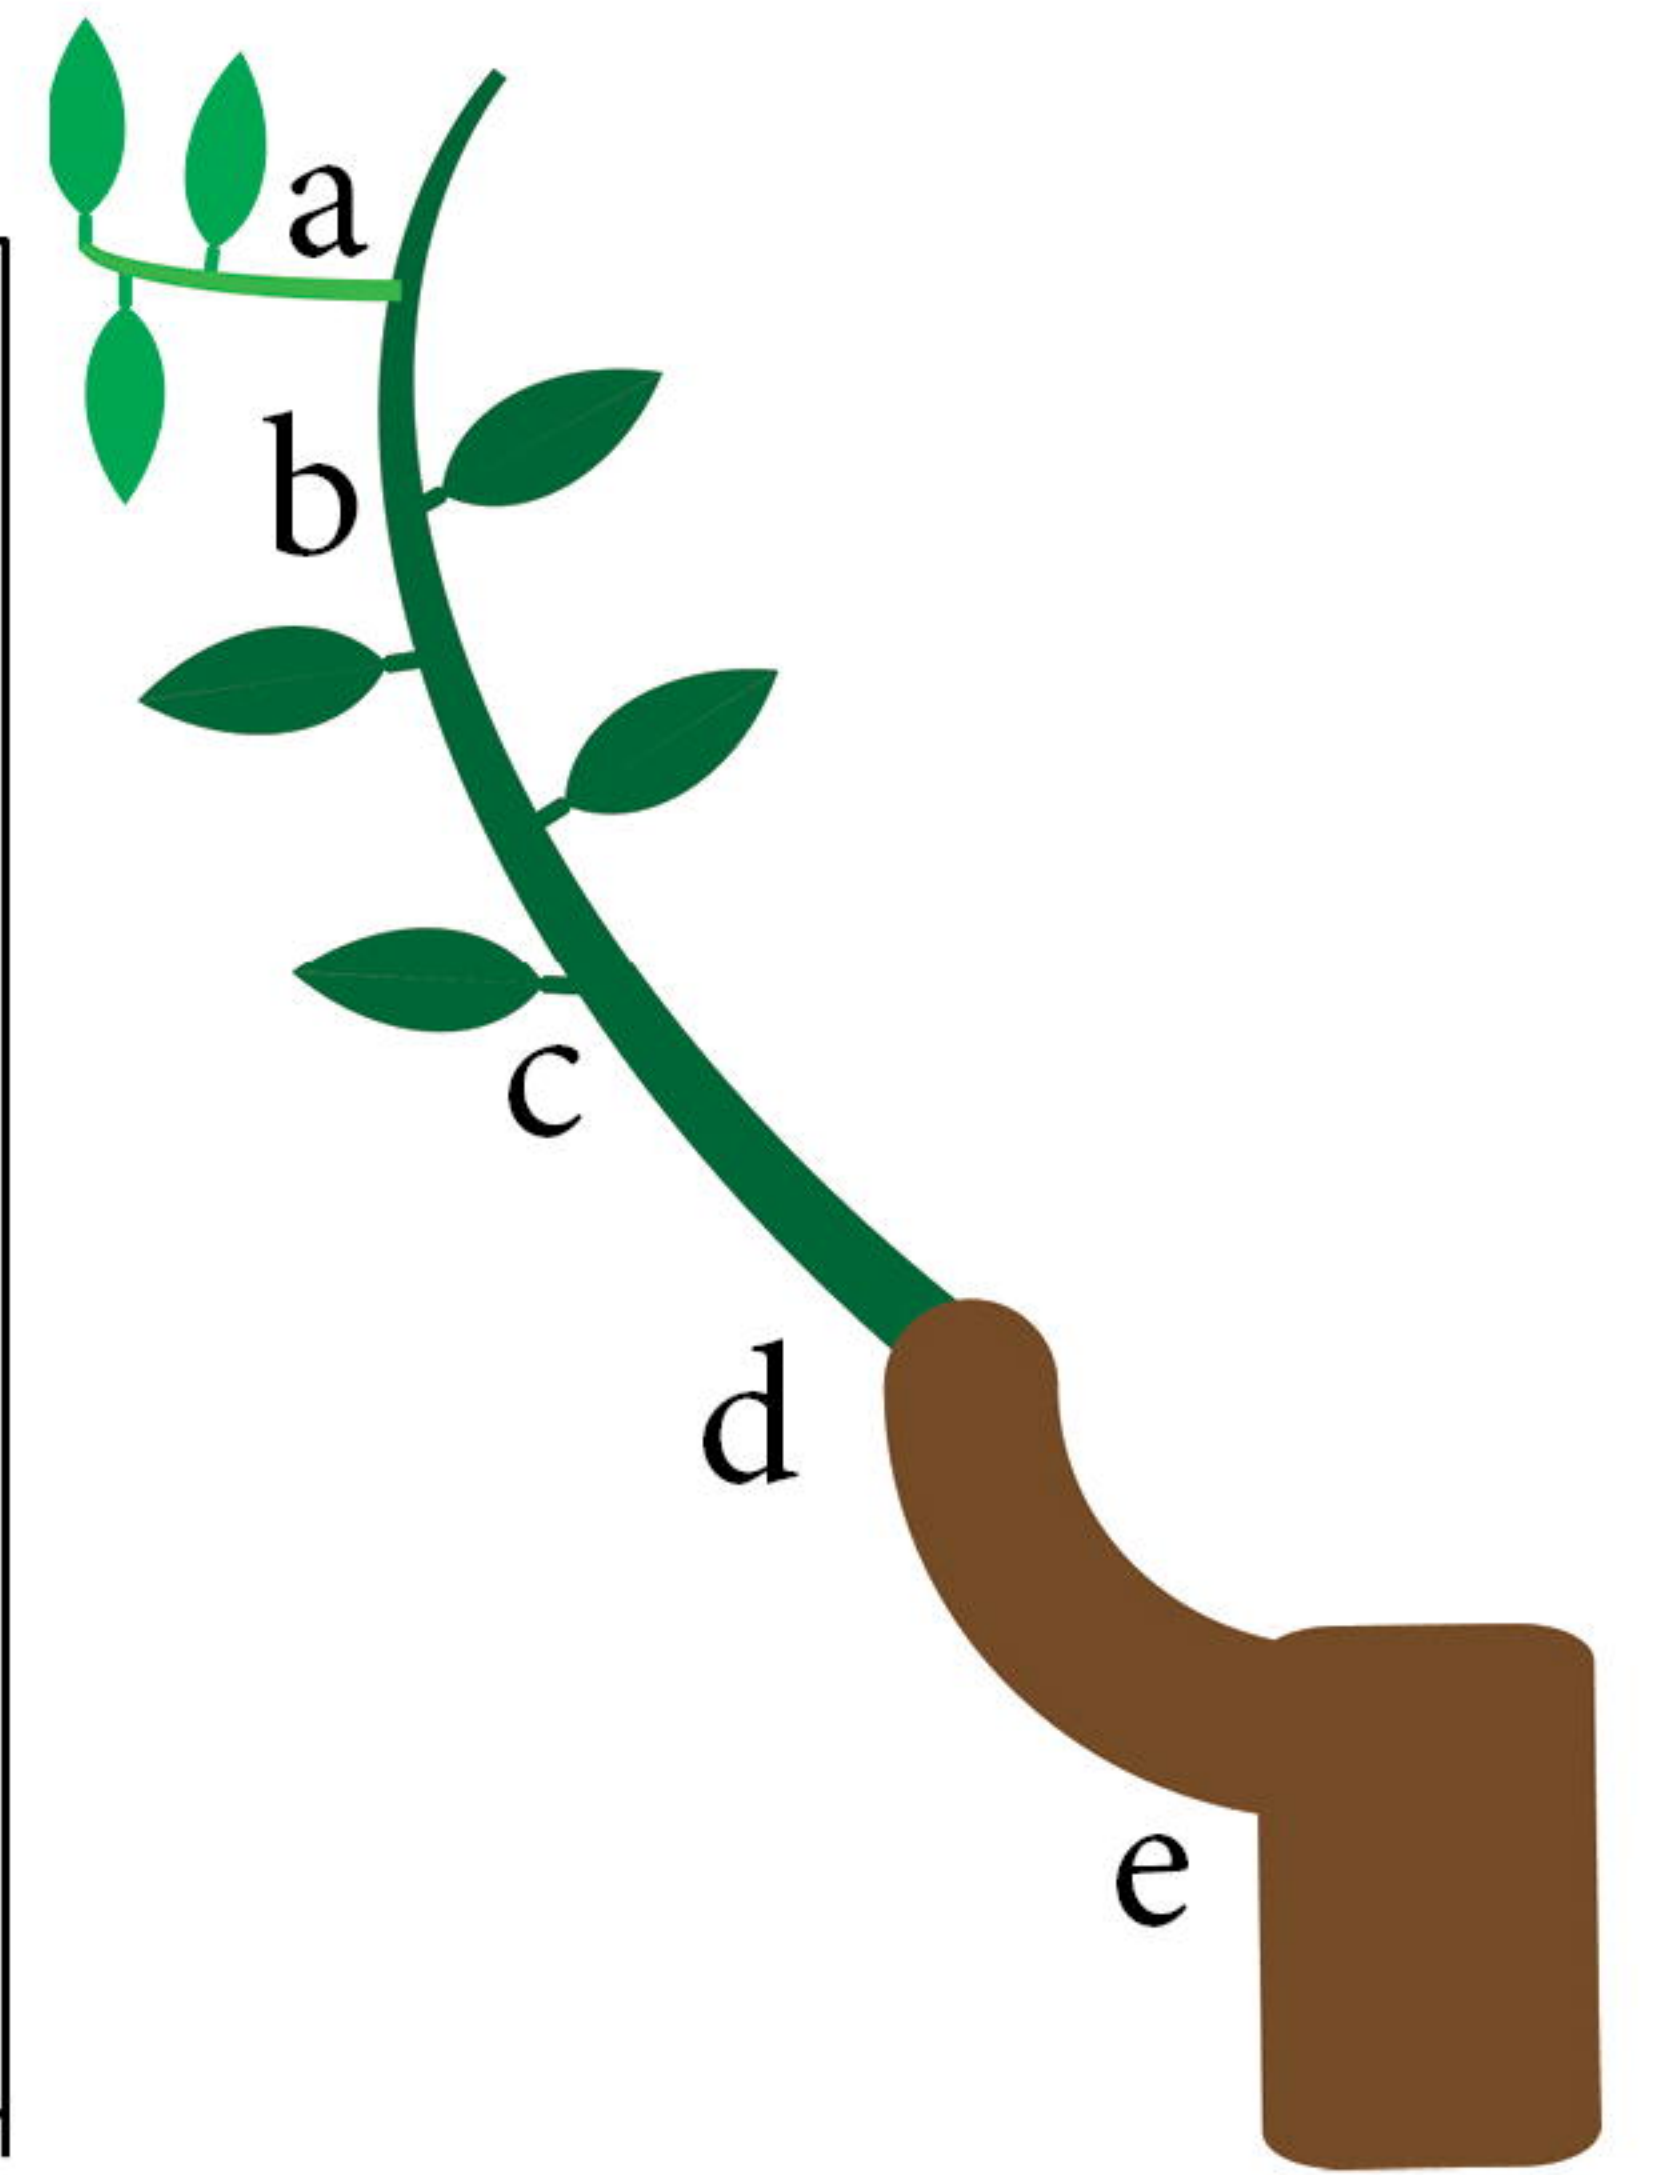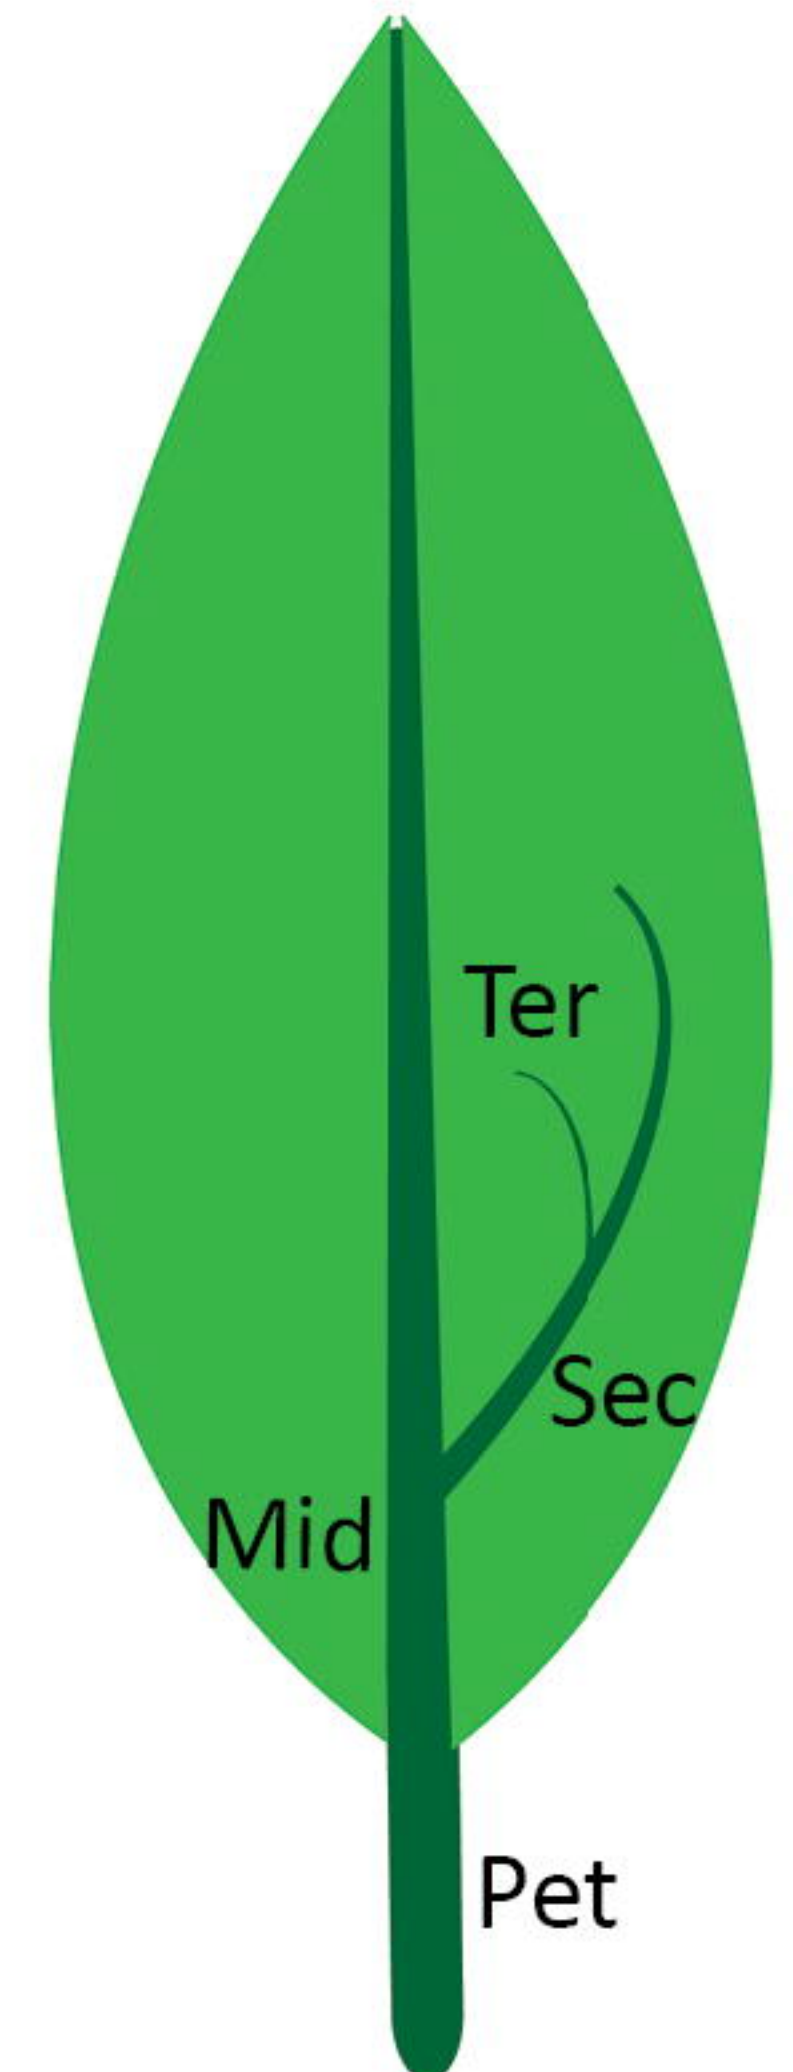

Source: https://www.biorxiv.org/content/10.1101/326322v1.full.pdf
